# Supplementary material for: N-Heterocyclic carbene-catalyzed enantioselective dearomatizing annulation of benzoxazoles with enals
Source: Royal Society of Chemistry journal article supplement (doi:10.1039/d1qo01861b), 2022-01-01
Supplement: d1qo01861b2.pdf [file d1qo01861b2.pdf]

*Supporting Information*

***N*-Heterocyclic Carbene-Catalyzed Enantioselective Dearomatizing  
Annulation of Benzoxazoles with Enals**

Yunpeng Chu, Fang Hu, Peng Feng, and Xin-Ping Hui\*

*State Key Laboratory of Applied Organic Chemistry, College of Chemistry and Chemical Engineering,  
Lanzhou University, Lanzhou 730000, P. R. China*

\*Corresponding authors: Prof. Xin-Ping Hui

E-mail: huixp@lzu.edu.cn

**Contents**

|                                                                                     |    |
|-------------------------------------------------------------------------------------|----|
| 1. General information.....                                                         | 2  |
| 2. General procedure for the NHC-catalyzed asymmetric dearomatization reaction..... | 2  |
| 3. Scale-up synthesis of product <b>3aa</b> .....                                   | 18 |
| 4. Synthetic transformations of products <b>3aa</b> .....                           | 19 |
| 5. Single crystal XRD data of compound <b>3aa</b> .....                             | 20 |
| 6. References.....                                                                  | 22 |
| 7. NMR spectra of compounds <b>3aa–3bl</b> and <b>4a</b> .....                      | 23 |
| 8. HPLC spectra of compounds <b>3aa–3bl</b> and <b>4a</b> .....                     | 62 |

## 1. General information

$^1\text{H}$  NMR and  $^{13}\text{C}$  NMR spectra were recorded on a Bruker AVANCE III 400 spectrometer using tetramethylsilane as internal reference, and chemical shifts ( $\delta$ ) and coupling constants ( $J$ ) were expressed in ppm and Hz, respectively. Optical rotation was measured by the Perkin Elmer 341 polarimeter. The HRMS analysis was obtained on a Bruker Apex II FT-ICR mass spectrometer with ESI ionization method. The *ee* value determination was carried out using HPLC with chiral Chirapak column on Agilent 1260 with a UV-detector. Melting points were taken on an XT-4 melting point apparatus and were uncorrected. Dichloromethane was freshly distilled from phosphorous pentoxide. THF and diethyl ether were freshly distilled from a deep-blue solution of sodium-benzophenone under nitrogen. Acetonitrile was dried by calcium hydride and freshly distilled. Other chemicals were purchased from commercial suppliers and used directly. All syntheses and manipulations were carried out under a dry nitrogen atmosphere. Flash column chromatography was carried out utilizing 200–300 mesh silica gel.

*N*-Heterocyclic carbene precatalysts **C1–C5**<sup>1</sup>, benzoxazole derivatives **1a–1l**<sup>2</sup>, benzoxazole derivatives **1m–1n**<sup>2</sup> and enals **2b–2y**<sup>3</sup> were prepared according to literatures, respectively.

## 2. General procedure for the NHC-catalyzed asymmetric dearomatization reaction

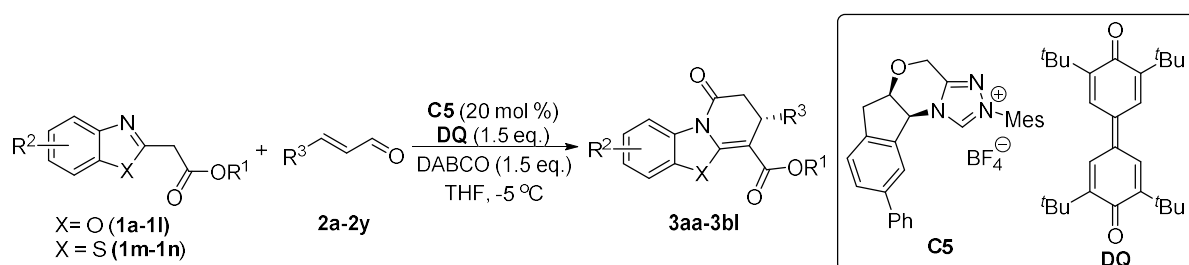

A dried and nitrogen-filled Schlenk tube was charged with benzoxazole derivatives **1** (0.1 mmol), enals **2** (0.15 mmol, 1.5 eq.), NHC precatalyst **C5** (0.02 mmol, 9.9 mg, 0.2 eq.), **DABCO** (0.15 mmol, 16.8 mg, 1.5 eq.) and **DQ** (0.15 mmol, 61.2 mg, 1.5 eq.) in dry THF (2 mL). The reaction mixture was stirred at  $-5\text{ }^\circ\text{C}$  until the consumption of benzoxazole derivatives **1** as monitored by TLC. The solvent was removed in vacuo and the residue was purified by chromatography on silica gel using hexanes/EtOAc (10:1) as eluent to afford the desired products **3**.

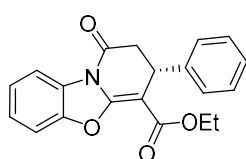

**ethyl (R)-1-oxo-3-phenyl-2,3-dihydro-1H-benzo[4,5]oxazolo[3,2-a]pyridine-4-carboxylate (3aa).** 23.8 mg, yield 71%, white solid, mp 153.9–155.1 °C,  $[\alpha]_D^{24}$  –207 (10 mg/mL in CH<sub>2</sub>Cl<sub>2</sub>). <sup>1</sup>H NMR (400 MHz, CDCl<sub>3</sub>)  $\delta$  7.97 – 7.95 (m, 1H), 7.32 – 7.20 (m, 8H), 4.38 (d, *J* = 6.8 Hz, 1H), 4.23 (q, *J* = 7.2 Hz, 2H), 3.17 (dd, *J* = 16.8, 8.0 Hz, 1H), 2.97 (dd, *J* = 16.8, 1.6 Hz, 1H), 1.27 (t, *J* = 7.2 Hz, 3H). <sup>13</sup>C NMR (100 MHz, CDCl<sub>3</sub>)  $\delta$  166.7, 165.0, 155.5, 147.3, 141.9, 128.9, 127.2, 126.8, 126.4, 125.4, 124.6, 114.7, 110.2, 84.6, 60.2, 39.3, 36.3, 14.4. HRMS (ESI): Exact Mass Calcd for C<sub>20</sub>H<sub>18</sub>NO<sub>4</sub> [M+H]: 336.1230, Found: 336.1236. HPLC (Chiralpak IG column, *n*-hexane/*i*-PrOH = 90/10, flow rate = 1.0 mL/min, retention time: *t*<sub>minor</sub> = 20.307 min, *t*<sub>major</sub> = 30.793 min, 93% ee).

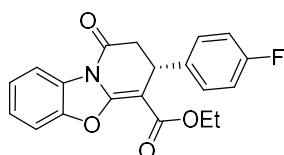

**ethyl (R)-3-(4-fluorophenyl)-1-oxo-2,3-dihydro-1H-benzo[4,5]oxazolo[3,2-a]pyridine-4-carboxylate (3ab).** 21.2 mg, yield 60%, white solid, mp 185.5–186.3 °C,  $[\alpha]_D^{24}$  –148 (10 mg/mL in CH<sub>2</sub>Cl<sub>2</sub>). <sup>1</sup>H NMR (400 MHz, CDCl<sub>3</sub>)  $\delta$  7.98 – 7.96 (m, 1H), 7.34 – 7.31 (m, 1H), 7.25 – 7.20 (m, 4H), 6.99 – 6.93 (m, 2H), 4.37 (dd, *J* = 8.0, 1.6 Hz, 1H), 4.27 – 4.21 (m, 2H), 3.17 (dd, *J* = 16.8, 8.0 Hz, 1H), 2.94 (dd, *J* = 16.8, 2.0 Hz, 1H), 1.28 (t, *J* = 7.2 Hz, 3H). <sup>13</sup>C NMR (100 MHz, CDCl<sub>3</sub>)  $\delta$  166.5, 165.0, 155.5, 147.3, 137.62, 137.59, 128.1, 128.0, 126.8, 125.6, 124.7, 115.8, 115.6, 114.8, 110.3, 84.5, 60.3, 39.4, 35.7, 14.4. HRMS (ESI): Exact Mass Calcd for C<sub>20</sub>H<sub>17</sub>FNO<sub>4</sub> [M+H]: 354.1136, Found: 354.1140. HPLC (Chiralpak IG column, *n*-hexane/*i*-PrOH = 90/10, flow rate = 1.0 mL/min, retention time: *t*<sub>minor</sub> = 20.408 min, *t*<sub>major</sub> = 28.376 min, 94% ee).

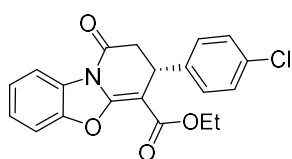

**ethyl (R)-3-(4-chlorophenyl)-1-oxo-2,3-dihydro-1H-benzo[4,5]oxazolo[3,2-a]pyridine-4-carboxylate (3ac).** 23.2 mg, yield 63%, white solid, mp 138.4–139.1 °C,  $[\alpha]_D^{24}$  –218 (10 mg/mL in CH<sub>2</sub>Cl<sub>2</sub>). <sup>1</sup>H NMR (400 MHz, CDCl<sub>3</sub>)  $\delta$  7.97 – 7.95 (m, 1H), 7.33 – 7.31 (m, 1H), 7.26 – 7.21 (m, 4H), 7.20 – 7.17 (m, 2H), 4.36 (dd, *J* = 8.0, 2.0 Hz, 1H), 4.23 (q, *J* = 7.2 Hz, 2H), 3.17 (dd, *J* = 16.8, 8.0 Hz, 1H), 2.93 (dd, *J* = 16.8, 2.0 Hz, 1H), 1.27 (t, *J* = 7.2 Hz, 3H). <sup>13</sup>C NMR (100 MHz, CDCl<sub>3</sub>)  $\delta$  166.4, 164.9, 155.6, 147.3, 140.4, 133.1, 129.0, 127.9, 126.7, 125.6, 124.7, 114.8, 110.3, 84.2, 60.3, 39.2, 35.8, 14.4. HRMS (ESI): Exact Mass Calcd

for C<sub>20</sub>H<sub>17</sub>ClNO<sub>4</sub> [M+H]: 370.0841, Found: 370.0844. HPLC (Chiralpak IG column, *n*-hexane/*i*-PrOH = 90/10, flow rate = 1.0 mL/min, retention time: *t*<sub>minor</sub> = 20.080 min, *t*<sub>major</sub> = 29.650 min, 93% ee).

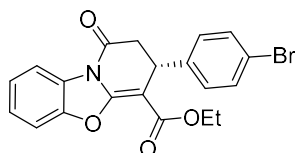

**ethyl (R)-3-(4-bromophenyl)-1-oxo-2,3-dihydro-1H-benzo[4,5]oxazolo[3,2-a]pyridine-4-carboxylate (3ad).** 25.2 mg, yield 61%, white solid, mp 122.6–123.4 °C, [ $\alpha$ ]<sub>D</sub><sup>24</sup> –234 (10 mg/mL in CH<sub>2</sub>Cl<sub>2</sub>). <sup>1</sup>H NMR (400 MHz, CDCl<sub>3</sub>)  $\delta$  7.96 (dd, *J* = 7.2, 1.6 Hz, 1H), 7.39 (d, *J* = 8.4 Hz, 2H), 7.33 – 7.31 (m, 1H), 7.25 – 7.20 (m, 2H), 7.13 (d, *J* = 8.0 Hz, 2H), 4.34 (d, *J* = 6.8 Hz, 1H), 4.23 (q, *J* = 7.2 Hz, 2H), 3.16 (dd, *J* = 16.8, 8.0 Hz, 1H), 2.93 (dd, *J* = 16.8, 2.0 Hz, 1H), 1.27 (t, *J* = 7.2 Hz, 3H). <sup>13</sup>C NMR (100 MHz, CDCl<sub>3</sub>)  $\delta$  166.3, 164.9, 155.6, 147.3, 141.0, 132.0, 128.3, 126.7, 125.6, 124.7, 121.1, 114.8, 110.3, 84.1, 60.4, 39.2, 35.9, 14.4. HRMS (ESI): Exact Mass Calcd for C<sub>20</sub>H<sub>17</sub>BrNO<sub>4</sub> [M+H]: 414.0335, Found: 414.0334. HPLC (Chiralpak IG column, *n*-hexane/*i*-PrOH = 90/10, flow rate = 1.0 mL/min, retention time: *t*<sub>minor</sub> = 21.596 min, *t*<sub>major</sub> = 31.631 min, 93% ee).

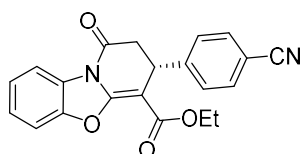

**ethyl (R)-3-(4-cyanophenyl)-1-oxo-2,3-dihydro-1H-benzo[4,5]oxazolo[3,2-a]pyridine-4-carboxylate (3ae).** 21.2 mg, yield 59%, pale yellow oil, [ $\alpha$ ]<sub>D</sub><sup>24</sup> –236 (10 mg/mL in CH<sub>2</sub>Cl<sub>2</sub>). <sup>1</sup>H NMR (400 MHz, CDCl<sub>3</sub>)  $\delta$  7.98 – 7.96 (m, 1H), 7.58 (d, *J* = 8.0 Hz, 2H), 7.38 – 7.32 (m, 3H), 7.29 – 7.21 (m, 2H), 4.43 (d, *J* = 6.8 Hz, 1H), 4.27 – 4.21 (m, 2H), 3.22 (dd, *J* = 16.8, 8.4 Hz, 1H), 2.94 (dd, *J* = 16.8, 2.0 Hz, 1H), 1.27 (t, *J* = 7.2 Hz, 3H). <sup>13</sup>C NMR (100 MHz, CDCl<sub>3</sub>)  $\delta$  165.9, 164.7, 155.8, 147.4, 147.2, 132.8, 127.4, 126.6, 125.8, 124.9, 118.6, 114.8, 111.4, 110.4, 83.5, 60.5, 38.8, 36.5, 14.4. HRMS (ESI): Exact Mass Calcd for C<sub>21</sub>H<sub>17</sub>N<sub>2</sub>O<sub>4</sub> [M+H]: 361.1183, Found: 361.1182. HPLC (Chiralpak IG column, *n*-hexane/*i*-PrOH = 70/30, flow rate = 1.0 mL/min, retention time: *t*<sub>minor</sub> = 21.171 min, *t*<sub>major</sub> = 23.415 min, 89% ee).

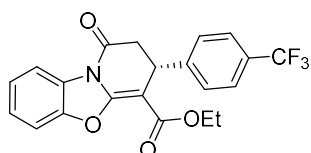

ethyl (*R*)-1-oxo-3-(4-(trifluoromethyl)phenyl)-2,3-dihydro-1*H*-benzo[4,5]oxazolo[3,2-*a*]pyridine-4-carboxylate (**3af**). 21.4 mg, yield 53%, yellow oil,  $[\alpha]_D^{24}$   $-142$  (10 mg/mL in  $\text{CH}_2\text{Cl}_2$ ).  $^1\text{H}$  NMR (400 MHz,  $\text{CDCl}_3$ )  $\delta$  7.98 – 7.96 (m, 1H), 7.54 (d,  $J = 8.0$  Hz, 2H), 7.39 – 7.32 (m, 3H), 7.26 – 7.21 (m, 2H), 4.45 (d,  $J = 7.2$  Hz, 1H), 4.24 (q,  $J = 7.2$  Hz, 2H), 3.21 (dd,  $J = 16.8, 8.0$  Hz, 1H), 2.96 (dd,  $J = 16.8, 2.0$  Hz, 1H), 1.28 (t,  $J = 7.2$  Hz, 3H).  $^{13}\text{C}$  NMR (100 MHz,  $\text{CDCl}_3$ )  $\delta$  166.2, 164.9, 155.7, 147.2, 146.0, 129.8, 129.5, 126.9, 126.7, 126.0, 125.92, 125.89, 125.7, 124.8, 114.8, 110.4, 83.9, 60.4, 39.0, 36.3, 14.4. HRMS (ESI): Exact Mass Calcd for  $\text{C}_{21}\text{H}_{17}\text{F}_3\text{NO}_4$   $[\text{M}+\text{H}]$ : 404.1104, Found: 404.1107. HPLC (Chiralpak IG column, *n*-hexane/*i*-PrOH = 90/10, flow rate = 1.0 mL/min, retention time:  $t_{\text{minor}} = 14.057$  min,  $t_{\text{major}} = 17.808$  min, 91% ee).

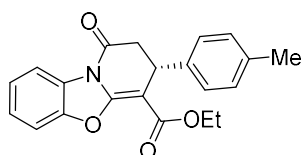

ethyl (*R*)-1-oxo-3-(*p*-tolyl)-2,3-dihydro-1*H*-benzo[4,5]oxazolo[3,2-*a*]pyridine-4-carboxylate (**3ag**). 11.6 mg, yield 33%, yellow oil,  $[\alpha]_D^{24}$   $-156$  (5 mg/mL in  $\text{CH}_2\text{Cl}_2$ ).  $^1\text{H}$  NMR (400 MHz,  $\text{CDCl}_3$ )  $\delta$  7.97 – 7.95 (m, 1H), 7.32 – 7.29 (m, 1H), 7.25 – 7.18 (m, 2H), 7.14 (d,  $J = 8.0$  Hz, 2H), 7.07 (d,  $J = 8.0$  Hz, 2H), 4.35 (d,  $J = 6.4$  Hz, 1H), 4.23 (q,  $J = 7.2$  Hz, 2H), 3.14 (dd,  $J = 16.8, 8.0$  Hz, 1H), 2.95 (dd,  $J = 16.8, 2.0$  Hz, 1H), 2.29 (s, 3H), 1.28 (t,  $J = 7.2$  Hz, 3H).  $^{13}\text{C}$  NMR (100 MHz,  $\text{CDCl}_3$ )  $\delta$  166.8, 165.1, 155.5, 147.3, 138.8, 136.9, 129.5, 126.9, 126.3, 125.4, 124.6, 114.7, 110.2, 84.8, 60.2, 39.4, 35.9, 21.0, 14.4. HRMS (ESI): Exact Mass Calcd for  $\text{C}_{21}\text{H}_{20}\text{NO}_4$   $[\text{M}+\text{H}]$ : 350.1387, Found: 350.1386. HPLC (Chiralpak IG column, *n*-hexane/*i*-PrOH = 90/10, flow rate = 1.0 mL/min, retention time:  $t_{\text{minor}} = 19.185$  min,  $t_{\text{major}} = 37.450$  min, 91% ee).

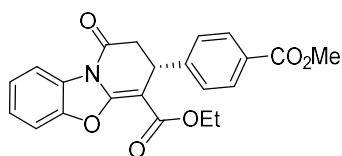

ethyl (*R*)-3-(4-(methoxycarbonyl)phenyl)-1-oxo-2,3-dihydro-1*H*-benzo[4,5]oxazolo[3,2-*a*]pyridine-4-carboxylate (**3ah**). 23.5 mg, yield 60%, white solid, mp 102.8–103.5 °C,  $[\alpha]_D^{24}$   $-187$  (10 mg/mL in  $\text{CH}_2\text{Cl}_2$ ).  $^1\text{H}$  NMR (400 MHz,  $\text{CDCl}_3$ )  $\delta$  7.98 – 7.94 (m, 3H), 7.34 – 7.32 (m, 3H), 7.26 – 7.21 (m, 2H), 4.43 (d,  $J = 6.8$  Hz, 1H), 4.22 (q,  $J = 6.8$  Hz, 2H), 3.88 (s, 3H), 3.21 (dd,  $J = 16.8, 8.0$  Hz, 1H), 2.96 (dd,  $J = 16.8, 1.6$  Hz, 1H), 1.26 (t,  $J = 7.2$  Hz, 3H).  $^{13}\text{C}$  NMR (100 MHz,  $\text{CDCl}_3$ )  $\delta$  166.7, 166.2, 164.8, 155.7, 147.2, 147.1, 130.3, 129.3, 126.7, 126.6, 125.6, 124.7, 114.8, 110.3, 83.9, 60.3, 52.1, 39.0, 36.4, 14.4. HRMS (ESI): Exact

Mass Calcd for C<sub>22</sub>H<sub>20</sub>NO<sub>6</sub> [M+H]: 394.1285, Found: 394.1285. HPLC (Chiralpak IG column, *n*-hexane/*i*-PrOH = 70/30, flow rate = 1.0 mL/min, retention time: *t*<sub>minor</sub> = 12.304 min, *t*<sub>major</sub> = 25.529 min, 94% ee).

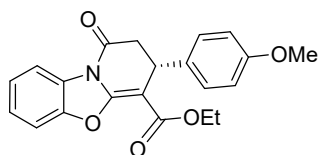

**ethyl (R)-3-(4-methoxyphenyl)-1-oxo-2,3-dihydro-1H-benzo[4,5]oxazolo[3,2-a]pyridine-4-carboxylate (3ai).** 12.1 mg, yield 33%, pale yellow solid, mp 116.7–117.4 °C, [ $\alpha$ ]<sub>D</sub><sup>24</sup> –111 (10 mg/mL in CH<sub>2</sub>Cl<sub>2</sub>). <sup>1</sup>H NMR (400 MHz, CDCl<sub>3</sub>)  $\delta$  7.98 – 7.95 (m, 1H), 7.32 – 7.30 (m, 1H), 7.25 – 7.15 (m, 4H), 6.82 – 6.78 (m, 2H), 4.34 (dd, *J* = 8.0, 1.6 Hz, 1H), 4.24 (q, *J* = 7.2 Hz, 2H), 3.76 (s, 3H), 3.14 (dd, *J* = 16.8, 7.6 Hz, 1H), 2.95 (dd, *J* = 16.8, 2.0 Hz, 1H), 1.28 (t, *J* = 7.2 Hz, 3H). <sup>13</sup>C NMR (100 MHz, CDCl<sub>3</sub>)  $\delta$  166.9, 165.1, 158.7, 155.4, 147.3, 133.9, 127.5, 126.9, 125.4, 124.6, 114.7, 114.2, 110.3, 84.9, 60.3, 55.3, 39.5, 35.5, 14.4. HRMS (ESI): Exact Mass Calcd for C<sub>21</sub>H<sub>20</sub>NO<sub>5</sub> [M+H]: 366.1336, Found: 366.1342. HPLC (Chiralpak IG column, *n*-hexane/*i*-PrOH = 90/10, flow rate = 1.0 mL/min, retention time: *t*<sub>minor</sub> = 38.290 min, *t*<sub>major</sub> = 53.857 min, 86% ee).

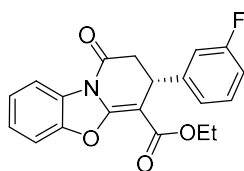

**ethyl (R)-3-(3-fluorophenyl)-1-oxo-2,3-dihydro-1H-benzo[4,5]oxazolo[3,2-a]pyridine-4-carboxylate (3aj).** 29.2 mg, yield 83%, white solid, mp 124.5–125.3 °C, [ $\alpha$ ]<sub>D</sub><sup>24</sup> –305 (10 mg/mL in CH<sub>2</sub>Cl<sub>2</sub>). <sup>1</sup>H NMR (400 MHz, CDCl<sub>3</sub>)  $\delta$  7.98 – 7.96 (m, 1H), 7.33 – 7.32 (m, 1H), 7.25 – 7.20 (m, 3H), 7.03 (d, *J* = 7.6 Hz, 1H), 6.97 – 6.89 (m, 2H), 4.38 (d, *J* = 8.0 Hz, 1H), 4.24 (q, *J* = 7.2 Hz, 2H), 3.18 (dd, *J* = 16.8, 8.0 Hz, 1H), 2.96 (dd, *J* = 16.8, 1.6 Hz, 1H), 1.28 (t, *J* = 7.2 Hz, 3H). <sup>13</sup>C NMR (100 MHz, CDCl<sub>3</sub>)  $\delta$  166.4, 164.9, 164.3, 161.8, 155.7, 147.3, 144.52, 144.45, 130.5, 130.4, 126.7, 125.6, 124.7, 122.1, 122.0, 114.8, 114.4, 114.1, 113.7, 113.5, 110.3, 84.0, 60.4, 39.2, 36.1, 14.4. HRMS (ESI): Exact Mass Calcd for C<sub>20</sub>H<sub>17</sub>FNO<sub>4</sub> [M+H]: 354.1136, Found: 354.1139. HPLC (Chiralpak IG column, *n*-hexane/*i*-PrOH = 90/10, flow rate = 1.0 mL/min, retention time: *t*<sub>minor</sub> = 19.569 min, *t*<sub>major</sub> = 25.974 min, 98% ee).

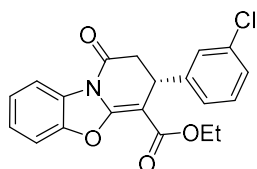

**ethyl (R)-3-(3-chlorophenyl)-1-oxo-2,3-dihydro-1H-benzo[4,5]oxazolo[3,2-a]pyridine-4-carboxylate (3ak).** 23.1 mg, yield 63%, white solid, mp 171.3–172.6 °C,  $[\alpha]_D^{24}$  –257 (10 mg/mL in CH<sub>2</sub>Cl<sub>2</sub>). <sup>1</sup>H NMR (400 MHz, CDCl<sub>3</sub>)  $\delta$  7.98 – 7.96 (m, 1H), 7.34 – 7.32 (m, 1H), 7.27 – 7.19 (m, 5H), 7.16 – 7.11 (m, 1H), 4.36 (dd,  $J$  = 8.0, 2.0 Hz, 1H), 4.28 – 4.20 (m, 2H), 3.18 (dd,  $J$  = 16.8, 8.0 Hz, 1H), 2.95 (dd,  $J$  = 16.8, 2.0 Hz, 1H), 1.28 (t,  $J$  = 7.2 Hz, 3H). <sup>13</sup>C NMR (100 MHz, CDCl<sub>3</sub>)  $\delta$  166.3, 164.8, 155.7, 147.3, 144.0, 134.7, 130.2, 127.6, 126.9, 126.7, 125.6, 124.7, 124.6, 114.8, 110.4, 83.9, 60.4, 39.1, 36.1, 14.4. HRMS (ESI): Exact Mass Calcd for C<sub>20</sub>H<sub>17</sub>ClNO<sub>4</sub> [M+H]: 370.0841, Found: 370.0840. HPLC (Chiralpak IG column, *n*-hexane/*i*-PrOH = 95/5, flow rate = 1.0 mL/min, retention time:  $t_{\text{minor}}$  = 31.729 min,  $t_{\text{major}}$  = 34.777 min, 96% ee).

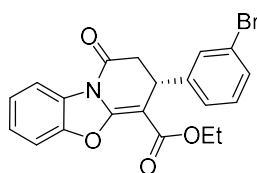

**ethyl (R)-3-(3-bromophenyl)-1-oxo-2,3-dihydro-1H-benzo[4,5]oxazolo[3,2-a]pyridine-4-carboxylate (3al).** 24.1 mg, yield 58%, white solid, mp 187.6–188.4 °C,  $[\alpha]_D^{24}$  –180 (10 mg/mL in CH<sub>2</sub>Cl<sub>2</sub>). <sup>1</sup>H NMR (400 MHz, CDCl<sub>3</sub>)  $\delta$  7.98 – 7.96 (m, 1H), 7.40 (s, 1H), 7.37 – 7.31 (m, 2H), 7.28 – 7.20 (m, 2H), 7.18 – 7.12 (m, 2H), 4.36 (dd,  $J$  = 8.0, 1.6 Hz, 1H), 4.28 – 4.20 (m, 2H), 3.18 (dd,  $J$  = 16.8, 8.0 Hz, 1H), 2.95 (dd,  $J$  = 16.8, 2.0 Hz, 1H), 1.28 (t,  $J$  = 7.2 Hz, 3H). <sup>13</sup>C NMR (100 MHz, CDCl<sub>3</sub>)  $\delta$  166.3, 164.8, 155.7, 147.3, 144.2, 130.53, 130.51, 129.9, 126.7, 125.6, 125.0, 124.8, 123.0, 114.8, 110.4, 83.8, 60.4, 39.2, 36.1, 14.4. HRMS (ESI): Exact Mass Calcd for C<sub>20</sub>H<sub>17</sub>BrNO<sub>4</sub> [M+H]: 414.0335, Found: 414.0334. HPLC (Chiralpak IG column, *n*-hexane/*i*-PrOH = 95/5, flow rate = 1.0 mL/min, retention time:  $t_{\text{minor}}$  = 34.850 min,  $t_{\text{major}}$  = 37.228 min, 92% ee).

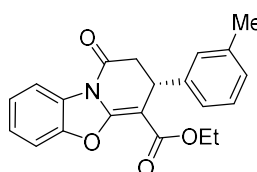

ethyl (*R*)-1-oxo-3-(*m*-tolyl)-2,3-dihydro-1*H*-benzo[4,5]oxazolo[3,2-*a*]pyridine-4-carboxylate (**3am**).

16.8 mg, yield 48%, white solid, mp 139.7–140.5 °C,  $[\alpha]_D^{24}$  –146 (10 mg/mL in CH<sub>2</sub>Cl<sub>2</sub>). <sup>1</sup>H NMR (400 MHz, CDCl<sub>3</sub>)  $\delta$  7.98 – 7.96 (m, 1H), 7.33 – 7.31 (m, 1H), 7.25 – 7.18 (m, 2H), 7.17 – 7.13 (m, 1H), 7.04 – 7.02 (m, 3H), 4.35 (dd, *J* = 8.0, 2.0 Hz, 1H), 4.23 (q, *J* = 7.2 Hz, 2H), 3.15 (dd, *J* = 16.8, 8.0 Hz, 1H), 2.97 (dd, *J* = 16.4, 2.0 Hz, 1H), 2.29 (s, 3H), 1.28 (t, *J* = 7.2 Hz, 3H). <sup>13</sup>C NMR (100 MHz, CDCl<sub>3</sub>)  $\delta$  166.8, 165.1, 155.5, 147.3, 141.8, 138.5, 128.8, 128.1, 127.3, 126.9, 125.4, 124.6, 123.4, 114.7, 110.3, 84.6, 60.2, 39.4, 36.2, 21.5, 14.4. HRMS (ESI): Exact Mass Calcd for C<sub>21</sub>H<sub>20</sub>NO<sub>4</sub> [M+H]: 350.1387, Found: 350.1387. HPLC (Chiralpak IG column, *n*-hexane/*i*-PrOH = 80/20, flow rate = 1.0 mL/min, retention time: *t*<sub>minor</sub> = 12.016 min, *t*<sub>major</sub> = 13.472 min, 94% ee).

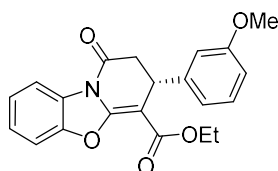

ethyl (*R*)-3-(3-methoxyphenyl)-1-oxo-2,3-dihydro-1*H*-benzo[4,5]oxazolo[3,2-*a*]pyridine-4-carboxylate

(**3an**). 15.3 mg, yield 42%, colorless oil,  $[\alpha]_D^{24}$  –175 (10 mg/mL in CH<sub>2</sub>Cl<sub>2</sub>). <sup>1</sup>H NMR (400 MHz, CDCl<sub>3</sub>)  $\delta$  7.97 – 7.94 (m, 1H), 7.32 – 7.30 (m, 1H), 7.25 – 7.17 (m, 3H), 6.84 – 6.80 (m, 2H), 6.77 – 6.74 (m, 1H), 4.36 (dd, *J* = 8.0, 2.0 Hz, 1H), 4.24 (q, *J* = 7.2 Hz, 2H), 3.75 (s, 3H), 3.15 (dd, *J* = 16.8, 8.0 Hz, 1H), 2.97 (dd, *J* = 16.8, 2.0 Hz, 1H), 1.28 (t, *J* = 7.2 Hz, 3H). <sup>13</sup>C NMR (100 MHz, CDCl<sub>3</sub>)  $\delta$  166.7, 165.0, 159.9, 155.6, 147.3, 143.5, 129.9, 126.8, 125.4, 124.6, 118.7, 114.7, 112.9, 112.1, 110.3, 84.4, 60.3, 55.2, 39.3, 36.3, 14.4. HRMS (ESI): Exact Mass Calcd for C<sub>21</sub>H<sub>20</sub>NO<sub>5</sub> [M+H]: 366.1336, Found: 366.1336. HPLC (Chiralpak IG column, *n*-hexane/*i*-PrOH = 80/20, flow rate = 1.0 mL/min, retention time: *t*<sub>minor</sub> = 17.734 min, *t*<sub>major</sub> = 23.561 min, 95% ee).

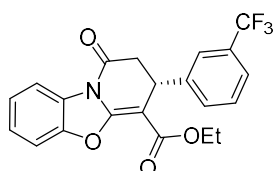

ethyl (*R*)-1-oxo-3-(3-(trifluoromethyl)phenyl)-2,3-dihydro-1*H*-benzo[4,5]oxazolo[3,2-*a*]pyridine-4-

carboxylate (**3ao**). 34.7 mg, yield 86%, white solid, mp 126.5–127.2 °C,  $[\alpha]_D^{24}$  –201 (10 mg/mL in CH<sub>2</sub>Cl<sub>2</sub>). <sup>1</sup>H NMR (400 MHz, CDCl<sub>3</sub>)  $\delta$  7.98 – 7.96 (m, 1H), 7.53 – 7.49 (m, 2H), 7.43 – 7.37 (m, 2H), 7.35 – 7.32 (m,



1H), 7.28 – 7.20 (m, 2H), 4.45 (dd,  $J = 8.0, 1.6$  Hz, 1H), 4.28 – 4.19 (m, 2H), 3.22 (dd,  $J = 16.8, 8.0$  Hz, 1H), 2.98 (dd,  $J = 16.8, 2.0$  Hz, 1H), 1.27 (t,  $J = 7.2$  Hz, 3H).  $^{13}\text{C}$  NMR (100 MHz,  $\text{CDCl}_3$ )  $\delta$  165.1, 163.7, 154.7, 146.2, 142.0, 130.3, 130.0, 128.5, 125.6, 124.6, 124.3, 123.8, 123.24, 123.20, 122.80, 122.77, 113.8, 109.4, 82.8, 59.4, 38.0, 35.2, 13.3. HRMS (ESI): Exact Mass Calcd for  $\text{C}_{21}\text{H}_{17}\text{F}_3\text{NO}_4$  [ $\text{M}+\text{H}$ ]: 404.1104, Found: 404.1103. HPLC (Chiralpak OD–H column,  $n$ -hexane/ $i$ -PrOH = 80/20, flow rate = 1.0 mL/min, retention time:  $t_{\text{minor}} = 8.784$  min,  $t_{\text{major}} = 18.067$  min, 96% ee).

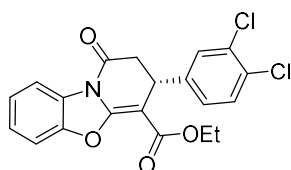

**ethyl (R)-3-(3,4-dichlorophenyl)-1-oxo-2,3-dihydro-1H-benzo[4,5]oxazolo[3,2-a]pyridine-4-carboxylate (3ap).** 32.2 mg, yield 80%, white solid, mp 119.7–120.6 °C,  $[\alpha]_{\text{D}}^{24} -245$  (10 mg/mL in  $\text{CH}_2\text{Cl}_2$ ).  $^1\text{H}$  NMR (400 MHz,  $\text{CDCl}_3$ )  $\delta$  7.97 – 7.95 (m, 1H), 7.35 – 7.32 (m, 3H), 7.25 – 7.20 (m, 2H), 7.08 (dd,  $J = 8.4, 2.0$  Hz, 1H), 4.35 (dd,  $J = 8.0, 1.6$  Hz, 1H), 4.27 – 4.21 (m, 2H), 3.18 (dd,  $J = 16.8, 8.0$  Hz, 1H), 2.93 (dd,  $J = 16.8, 2.0$  Hz, 1H), 1.29 (t,  $J = 7.2$  Hz, 3H).  $^{13}\text{C}$  NMR (100 MHz,  $\text{CDCl}_3$ )  $\delta$  166.0, 164.7, 155.7, 147.2, 142.2, 132.9, 131.4, 130.9, 128.8, 126.7, 125.8, 125.7, 124.8, 114.8, 110.4, 83.6, 60.5, 39.0, 35.7, 14.4. HRMS (ESI): Exact Mass Calcd for  $\text{C}_{20}\text{H}_{16}\text{Cl}_2\text{NO}_4$  [ $\text{M}+\text{H}$ ]: 404.0451, Found: 404.0450. HPLC (Chiralpak IG column,  $n$ -hexane/ $i$ -PrOH = 90/10, flow rate = 1.0 mL/min, retention time:  $t_{\text{minor}} = 20.104$  min,  $t_{\text{major}} = 22.161$  min, 94% ee).

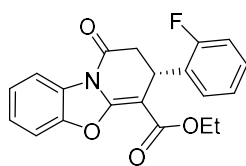

**ethyl (S)-3-(2-fluorophenyl)-1-oxo-2,3-dihydro-1H-benzo[4,5]oxazolo[3,2-a]pyridine-4-carboxylate (3aq).** 20.8 mg, yield 59%, yellow solid, mp 113.4–113.9 °C,  $[\alpha]_{\text{D}}^{24} -105$  (10 mg/mL in  $\text{CH}_2\text{Cl}_2$ ).  $^1\text{H}$  NMR (400 MHz,  $\text{CDCl}_3$ )  $\delta$  7.98 – 7.95 (m, 1H), 7.35 – 7.33 (m, 1H), 7.26 – 7.13 (m, 4H), 7.07 – 6.99 (m, 2H), 4.67 (dd,  $J = 8.4, 1.6$  Hz, 1H), 4.20 (q,  $J = 7.2$  Hz, 2H), 3.18 (dd,  $J = 16.8, 8.8$  Hz, 1H), 2.96 (dd,  $J = 16.8, 2.0$  Hz, 1H), 1.23 (t,  $J = 7.2$  Hz, 3H).  $^{13}\text{C}$  NMR (100 MHz,  $\text{CDCl}_3$ )  $\delta$  166.3, 164.7, 156.1, 147.3, 129.0, 128.9, 128.6, 128.4, 127.99, 127.95, 126.8, 125.4, 124.7, 124.32, 124.29, 116.0, 115.8, 114.7, 110.3, 82.5, 60.2, 38.3, 31.0, 14.3. HRMS (ESI): Exact Mass Calcd for  $\text{C}_{20}\text{H}_{17}\text{FNO}_4$  [ $\text{M}+\text{H}$ ]: 354.1136, Found: 354.1138.

HPLC (Chiralpak IG column, *n*-hexane/*i*-PrOH = 90/10, flow rate = 1.0 mL/min, retention time:  $t_{\text{minor}} = 18.115$  min,  $t_{\text{major}} = 23.237$  min, 90% ee).

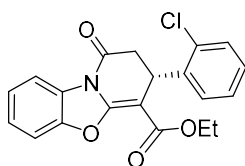

**ethyl (S)-3-(2-chlorophenyl)-1-oxo-2,3-dihydro-1H-benzo[4,5]oxazolo[3,2-a]pyridine-4-carboxylate (3ar).** 24.3 mg, yield 66%, pale yellow solid, mp 125.0–125.9 °C,  $[\alpha]_{\text{D}}^{25} -78$  (10 mg/mL in  $\text{CH}_2\text{Cl}_2$ ).  $^1\text{H}$  NMR (400 MHz,  $\text{CDCl}_3$ )  $\delta$  7.95 (d,  $J = 6.4$  Hz, 1H), 7.41 – 7.35 (m, 2H), 7.26 – 7.11 (m, 5H), 4.86 (d,  $J = 7.6$  Hz, 1H), 4.19 – 4.14 (m, 2H), 3.17 (dd,  $J = 16.8, 8.4$  Hz, 1H), 2.98 (d,  $J = 17.2$  Hz, 1H), 1.20 (t,  $J = 6.8$  Hz, 3H).  $^{13}\text{C}$  NMR (100 MHz,  $\text{CDCl}_3$ )  $\delta$  166.1, 164.6, 156.3, 147.3, 138.4, 133.3, 130.3, 128.6, 127.3, 126.9, 126.7, 125.5, 124.7, 114.7, 110.4, 83.2, 60.3, 38.0, 33.6, 14.2. HRMS (ESI): Exact Mass Calcd for  $\text{C}_{20}\text{H}_{17}\text{ClNO}_4$   $[\text{M}+\text{H}]$ : 370.0841, Found: 370.0844. HPLC (Chiralpak IG column, *n*-hexane/*i*-PrOH = 90/10, flow rate = 1.0 mL/min, retention time:  $t_{\text{minor}} = 18.760$  min,  $t_{\text{major}} = 20.915$  min, 86% ee).

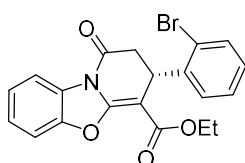

**ethyl (S)-3-(2-bromophenyl)-1-oxo-2,3-dihydro-1H-benzo[4,5]oxazolo[3,2-a]pyridine-4-carboxylate (3as).** 31.0 mg, yield 75%, white solid, mp 124.9–125.3 °C,  $[\alpha]_{\text{D}}^{25} -121$  (10 mg/mL in  $\text{CH}_2\text{Cl}_2$ ).  $^1\text{H}$  NMR (400 MHz,  $\text{CDCl}_3$ )  $\delta$  7.95 (d,  $J = 7.2$  Hz, 1H), 7.60 (d,  $J = 7.6$  Hz, 1H), 7.36 (d,  $J = 7.2$  Hz, 1H), 7.28 – 7.07 (m, 5H), 4.84 (d,  $J = 7.2$  Hz, 1H), 4.19 – 4.14 (m, 2H), 3.16 (dd,  $J = 16.8, 8.8$  Hz, 1H), 2.97 (d,  $J = 16.4$  Hz, 1H), 1.20 (t,  $J = 7.2$  Hz, 3H).  $^{13}\text{C}$  NMR (100 MHz,  $\text{CDCl}_3$ )  $\delta$  166.0, 164.6, 156.3, 147.3, 140.0, 133.7, 128.9, 128.0, 127.0, 126.7, 125.6, 124.7, 123.8, 114.7, 110.4, 83.5, 60.3, 38.1, 36.1, 14.3. HRMS (ESI): Exact Mass Calcd for  $\text{C}_{20}\text{H}_{17}\text{BrNO}_4$   $[\text{M}+\text{H}]$ : 414.0335, Found: 414.0338. HPLC (Chiralpak IG column, *n*-hexane/*i*-PrOH = 90/10, flow rate = 1.0 mL/min, retention time:  $t_{\text{minor}} = 20.085$  min,  $t_{\text{major}} = 22.113$  min, 89% ee).

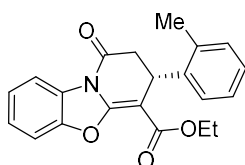

**ethyl (*R*)-1-oxo-3-(*o*-tolyl)-2,3-dihydro-1*H*-benzo[4,5]oxazolo[3,2-*a*]pyridine-4-carboxylate (3at).** 14.1 mg, yield 40%, white solid, mp 100.9–101.5 °C,  $[\alpha]_D^{25}$  –178 (10 mg/mL in CH<sub>2</sub>Cl<sub>2</sub>). <sup>1</sup>H NMR (400 MHz, CDCl<sub>3</sub>)  $\delta$  7.97 – 7.95 (m, 1H), 7.34 (d, *J* = 7.2 Hz, 1H), 7.25 – 7.17 (m, 3H), 7.13 – 7.08 (m, 1H), 7.05 – 7.04 (m, 2H), 4.60 (d, *J* = 7.2 Hz, 1H), 4.22 – 4.10 (m, 2H), 3.16 (dd, *J* = 16.4, 8.4 Hz, 1H), 2.76 (dd, *J* = 16.4, 1.2 Hz, 1H), 2.46 (s, 3H), 1.21 (t, *J* = 7.2 Hz, 3H). <sup>13</sup>C NMR (100 MHz, CDCl<sub>3</sub>)  $\delta$  166.3, 164.9, 155.9, 147.3, 139.7, 134.8, 131.1, 127.2, 126.8, 126.7, 125.4, 125.0, 124.6, 114.7, 110.3, 84.5, 60.2, 38.7, 32.6, 19.4, 14.3. HRMS (ESI): Exact Mass Calcd for C<sub>21</sub>H<sub>20</sub>NO<sub>4</sub> [M+H]: 350.1387, Found: 350.1392. HPLC (Chiralpak IG column, *n*-hexane/*i*-PrOH = 90/10, flow rate = 1.0 mL/min, retention time: *t*<sub>minor</sub> = 17.226 min, *t*<sub>major</sub> = 24.595 min, 94% ee).

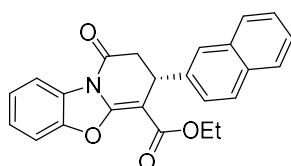

**ethyl (*R*)-3-(naphthalen-2-yl)-1-oxo-2,3-dihydro-1*H*-benzo[4,5]oxazolo[3,2-*a*]pyridine-4-carboxylate (3au).** 16.2 mg, yield 42%, pale yellow solid, mp 173.1–173.6 °C,  $[\alpha]_D^{25}$  –269 (10 mg/mL in CH<sub>2</sub>Cl<sub>2</sub>). <sup>1</sup>H NMR (400 MHz, CDCl<sub>3</sub>)  $\delta$  7.97 (d, *J* = 6.0 Hz, 1H), 7.79 – 7.77 (m, 3H), 7.66 (s, 1H), 7.44 – 7.33 (m, 4H), 7.26 – 7.19 (m, 2H), 4.56 (d, *J* = 6.8 Hz, 1H), 4.22 (q, *J* = 5.6 Hz, 2H), 3.24 (dd, *J* = 16.8, 8.0 Hz, 1H), 3.08 (dd, *J* = 16.8, 1.6 Hz, 1H), 1.26 (t, *J* = 7.2 Hz, 3H). <sup>13</sup>C NMR (100 MHz, CDCl<sub>3</sub>)  $\delta$  166.7, 165.1, 155.7, 147.4, 139.1, 133.5, 132.7, 128.9, 127.9, 127.6, 126.9, 126.2, 125.8, 125.5, 125.1, 124.69, 124.65, 114.8, 110.3, 84.4, 60.3, 39.3, 36.4, 14.4. HRMS (ESI): Exact Mass Calcd for C<sub>24</sub>H<sub>20</sub>NO<sub>4</sub> [M+H]: 386.1387, Found: 386.1387. HPLC (Chiralpak IG column, *n*-hexane/*i*-PrOH = 90/10, flow rate = 1.0 mL/min, retention time: *t*<sub>minor</sub> = 32.373 min, *t*<sub>major</sub> = 36.768 min, 94% ee).

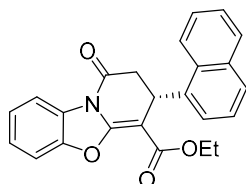

**ethyl (*R*)-3-(naphthalen-1-yl)-1-oxo-2,3-dihydro-1*H*-benzo[4,5]oxazolo[3,2-*a*]pyridine-4-carboxylate (3av).** 21.5 mg, yield 56%, pale yellow solid, mp 153.6–155.1 °C,  $[\alpha]_D^{25}$  –9 (10 mg/mL in CH<sub>2</sub>Cl<sub>2</sub>). <sup>1</sup>H NMR (400 MHz, CDCl<sub>3</sub>)  $\delta$  8.14 (d, *J* = 8.4 Hz, 1H), 7.92 – 7.88 (m, 2H), 7.77 – 7.70 (m, 1H), 7.62 – 7.58 (m, 1H), 7.54 – 7.50 (m, 1H), 7.38 – 7.36 (m, 1H), 7.33 – 7.27 (m, 2H), 7.25 – 7.19 (m, 2H), 5.25 (d, *J* = 7.2 Hz, 1H),

4.21 – 4.08 (m, 2H), 3.30 (dd,  $J = 16.4, 8.8$  Hz, 1H), 3.06 (dd,  $J = 16.8, 1.6$  Hz, 1H), 1.13 (t,  $J = 7.2$  Hz, 3H).  $^{13}\text{C}$  NMR (100 MHz,  $\text{CDCl}_3$ )  $\delta$  166.3, 164.9, 156.3, 147.4, 136.2, 134.6, 130.5, 129.3, 128.1, 126.8, 126.4, 125.7, 125.49, 125.46, 124.7, 122.7, 122.6, 114.7, 110.3, 83.7, 60.2, 39.0, 32.2, 14.3. HRMS (ESI): Exact Mass Calcd for  $\text{C}_{24}\text{H}_{20}\text{NO}_4$  [ $\text{M}+\text{H}$ ]: 386.1387, Found: 386.1389. HPLC (Chiralpak AD–H column, *n*-hexane/*i*-PrOH = 80/20, flow rate = 1.0 mL/min, retention time:  $t_{\text{major}} = 11.888$  min,  $t_{\text{minor}} = 15.341$  min, 91% ee).

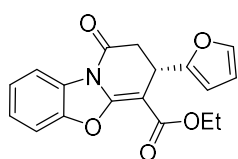

**ethyl (S)-3-(furan-2-yl)-1-oxo-2,3-dihydro-1H-benzo[4,5]oxazolo[3,2-a]pyridine-4-carboxylate (3aw).**

11.2 mg, yield 34%, yellow solid, mp 138.7–140.4 °C,  $[\alpha]_{\text{D}}^{26} -2$  (5 mg/mL in  $\text{CH}_2\text{Cl}_2$ ).  $^1\text{H}$  NMR (400 MHz,  $\text{CDCl}_3$ )  $\delta$  8.00 – 7.95 (m, 1H), 7.30 – 7.27 (m, 2H), 7.24 – 7.18 (m, 2H), 6.24 – 6.23 (m, 1H), 6.11 (d,  $J = 3.2$  Hz, 1H), 4.45 (d,  $J = 5.6$  Hz, 1H), 4.35 – 4.23 (m, 2H), 3.11 (dd,  $J = 16.8, 2.0$  Hz, 1H), 3.02 (dd,  $J = 16.8, 7.2$  Hz, 1H), 1.34 (t,  $J = 7.2$  Hz, 3H).  $^{13}\text{C}$  NMR (100 MHz,  $\text{CDCl}_3$ )  $\delta$  166.6, 164.8, 155.7, 154.4, 147.2, 142.1, 126.9, 125.4, 124.6, 114.8, 110.3, 110.2, 105.5, 82.6, 60.3, 36.3, 30.7, 14.5. HRMS (ESI): Exact Mass Calcd for  $\text{C}_{18}\text{H}_{16}\text{NO}_5$  [ $\text{M}+\text{H}$ ]: 326.1023, Found: 326.1027. HPLC (Chiralpak IG column, *n*-hexane/*i*-PrOH = 80/20, flow rate = 1.0 mL/min, retention time:  $t_{\text{minor}} = 12.520$  min,  $t_{\text{major}} = 18.410$  min, >99% ee).

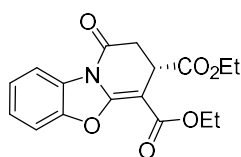

**diethyl (S)-1-oxo-2,3-dihydro-1H-benzo[4,5]oxazolo[3,2-a]pyridine-3,4-dicarboxylate (3ax).** 9.9 mg,

yield 30%, colorless oil,  $[\alpha]_{\text{D}}^{26} -20$  (5 mg/mL in  $\text{CH}_2\text{Cl}_2$ ).  $^1\text{H}$  NMR (400 MHz,  $\text{CDCl}_3$ )  $\delta$  7.99 – 7.95 (m, 1H), 7.32 – 7.27 (m, 1H), 7.25 – 7.19 (m, 2H), 4.38 – 4.24 (m, 2H), 4.19 – 4.11 (m, 2H), 4.02 (dd,  $J = 7.6, 2.0$  Hz, 1H), 3.10 (dd,  $J = 16.8, 2.0$  Hz, 1H), 2.92 (dd,  $J = 17.2, 7.6$  Hz, 1H), 1.35 (t,  $J = 7.2$  Hz, 3H), 1.23 (t,  $J = 7.2$  Hz, 3H).  $^{13}\text{C}$  NMR (100 MHz,  $\text{CDCl}_3$ )  $\delta$  172.2, 165.8, 164.6, 156.2, 147.1, 126.7, 125.5, 124.8, 114.8, 110.3, 80.1, 61.6, 60.4, 37.0, 34.2, 14.5, 14.1. HRMS (ESI): Exact Mass Calcd for  $\text{C}_{17}\text{H}_{18}\text{NO}_6$  [ $\text{M}+\text{H}$ ]: 332.1129, Found: 332.1132. HPLC (Chiralpak IG column, *n*-hexane/*i*-PrOH = 80/20, flow rate = 1.0 mL/min, retention time:  $t_{\text{minor}} = 23.353$  min,  $t_{\text{major}} = 26.005$  min, 97% ee).

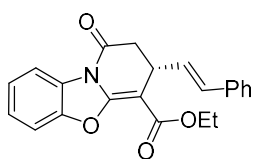

**ethyl (*R,E*)-1-oxo-3-styryl-2,3-dihydro-1*H*-benzo[4,5]oxazolo[3,2-*a*]pyridine-4-carboxylate (**3ay**).** 10.1 mg, yield 28%, yellow solid, mp 101.2–102.5 °C,  $[\alpha]_D^{26} -7$  (10 mg/mL in CH<sub>2</sub>Cl<sub>2</sub>). <sup>1</sup>H NMR (400 MHz, CDCl<sub>3</sub>)  $\delta$  7.99–7.96 (m, 1H), 7.34–7.27 (m, 4H), 7.25–7.18 (m, 4H), 6.49 (dd,  $J = 16.0, 1.2$  Hz, 1H), 6.20 (dd,  $J = 16.0, 6.4$  Hz, 1H), 4.38–4.26 (m, 2H), 3.97–3.93 (m, 1H), 3.02–2.90 (m, 2H), 1.36 (t,  $J = 7.2$  Hz, 3H). <sup>13</sup>C NMR (100 MHz, CDCl<sub>3</sub>)  $\delta$  167.0, 164.9, 155.0, 147.3, 136.6, 129.8, 128.5, 128.0, 127.6, 126.9, 126.4, 125.4, 124.6, 114.8, 110.2, 83.6, 60.3, 36.9, 33.6, 14.5. HRMS (ESI): Exact Mass Calcd for C<sub>22</sub>H<sub>20</sub>NO<sub>4</sub> [M+H]: 362.1387, Found: 362.1389. HPLC (Chiralpak AD–H column, *n*-hexane/*i*-PrOH = 80/20, flow rate = 1.0 mL/min, retention time:  $t_{\text{major}} = 8.918$  min,  $t_{\text{minor}} = 10.061$  min, 29% ee).

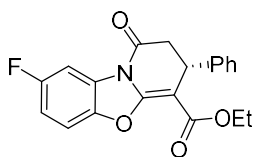

**ethyl (*R*)-8-fluoro-1-oxo-3-phenyl-2,3-dihydro-1*H*-benzo[4,5]oxazolo[3,2-*a*]pyridine-4-carboxylate (**3az**).** 15.5 mg, yield 44%, pale yellow solid, mp 105.2–106.0 °C,  $[\alpha]_D^{26} -142$  (10 mg/mL in CH<sub>2</sub>Cl<sub>2</sub>). <sup>1</sup>H NMR (400 MHz, CDCl<sub>3</sub>)  $\delta$  7.72 (dd,  $J = 8.0, 2.8$  Hz, 1H), 7.30–7.20 (m, 6H), 6.92 (dt,  $J = 6.4, 2.8$  Hz, 1H), 4.39 (dd,  $J = 8.0, 1.6$  Hz, 1H), 4.23 (q,  $J = 7.2$  Hz, 2H), 3.17 (dd,  $J = 16.8, 8.0$  Hz, 1H), 2.98 (dd,  $J = 16.8, 2.0$  Hz, 1H), 1.26 (t,  $J = 7.2$  Hz, 3H). <sup>13</sup>C NMR (100 MHz, CDCl<sub>3</sub>)  $\delta$  166.6, 164.8, 160.7, 158.3, 156.0, 143.37, 143.35, 141.7, 129.0, 127.6, 127.43, 127.36, 126.4, 111.7, 111.5, 110.6, 110.5, 103.5, 103.2, 85.1, 60.4, 39.2, 36.2, 14.4. HRMS (ESI): Exact Mass Calcd for C<sub>20</sub>H<sub>17</sub>FNO<sub>4</sub> [M+H]: 354.1136, Found: 354.1135. HPLC (Chiralpak IG column, *n*-hexane/*i*-PrOH = 90/10, flow rate = 1.0 mL/min, retention time:  $t_{\text{minor}} = 19.719$  min,  $t_{\text{major}} = 38.627$  min, 93% ee).

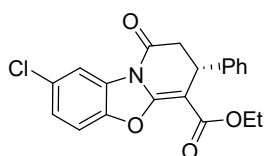

**ethyl (*R*)-8-chloro-1-oxo-3-phenyl-2,3-dihydro-1*H*-benzo[4,5]oxazolo[3,2-*a*]pyridine-4-carboxylate (**3ba**).** 20.0 mg, yield 54%, white solid, mp 162.9–171.8 °C,  $[\alpha]_D^{26} -203$  (10 mg/mL in CH<sub>2</sub>Cl<sub>2</sub>). <sup>1</sup>H NMR

(400 MHz, CDCl<sub>3</sub>)  $\delta$  7.98 (d,  $J$  = 1.6 Hz, 1H), 7.30 – 7.18 (m, 7H), 4.39 (d,  $J$  = 7.6 Hz, 1H), 4.23 (q,  $J$  = 7.2 Hz, 2H), 3.17 (dd,  $J$  = 16.8, 8.0 Hz, 1H), 2.98 (dd,  $J$  = 16.8, 1.6 Hz, 1H), 1.26 (t,  $J$  = 7.2 Hz, 3H). <sup>13</sup>C NMR (100 MHz, CDCl<sub>3</sub>)  $\delta$  166.5, 164.7, 155.4, 145.9, 141.5, 130.0, 128.9, 127.7, 127.4, 126.3, 125.3, 115.1, 110.9, 85.2, 60.4, 39.2, 36.2, 14.3. HRMS (ESI): Exact Mass Calcd for C<sub>20</sub>H<sub>17</sub>ClNO<sub>4</sub> [M+H]: 370.0841, Found: 370.0840. HPLC (Chiralpak IG column, *n*-hexane/*i*-PrOH = 90/10, flow rate = 1.0 mL/min, retention time:  $t_{\text{minor}}$  = 21.954 min,  $t_{\text{major}}$  = 44.002 min, 87% ee).

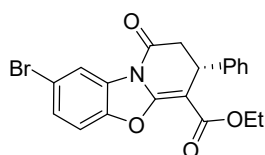

**ethyl (R)-8-bromo-1-oxo-3-phenyl-2,3-dihydro-1H-benzo[4,5]oxazolo[3,2-a]pyridine-4-carboxylate (3bb).** 23.5 mg, yield 57%, white solid, mp 182.1–182.9 °C, [ $\alpha$ ]<sub>D</sub><sup>27</sup> –181 (10 mg/mL in CH<sub>2</sub>Cl<sub>2</sub>). <sup>1</sup>H NMR (400 MHz, CDCl<sub>3</sub>)  $\delta$  8.12 (d,  $J$  = 1.2 Hz, 1H), 7.35 (dd,  $J$  = 8.8, 1.6 Hz, 1H), 7.30 – 7.26 (m, 2H), 7.24 – 7.22 (m, 3H), 7.17 (d,  $J$  = 8.8 Hz, 1H), 4.38 (d,  $J$  = 7.2 Hz, 1H), 4.22 (q,  $J$  = 7.2 Hz, 2H), 3.16 (dd,  $J$  = 16.8, 8.0 Hz, 1H), 2.98 (dd,  $J$  = 16.8, 1.2 Hz, 1H), 1.26 (t,  $J$  = 7.2 Hz, 3H). <sup>13</sup>C NMR (100 MHz, CDCl<sub>3</sub>)  $\delta$  166.6, 164.8, 155.3, 146.5, 141.6, 129.0, 128.2, 128.1, 127.4, 126.4, 117.9, 117.1, 111.4, 85.3, 60.4, 39.2, 36.2, 14.4. HRMS (ESI): Exact Mass Calcd for C<sub>20</sub>H<sub>17</sub>BrNO<sub>4</sub> [M+H]: 414.0335, Found: 414.0334. HPLC (Chiralpak IG column, *n*-hexane/*i*-PrOH = 80/20, flow rate = 1.0 mL/min, retention time:  $t_{\text{minor}}$  = 14.847 min,  $t_{\text{major}}$  = 26.552 min, 87% ee).

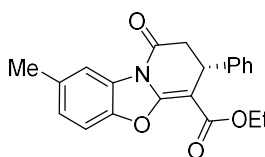

**ethyl (R)-8-methyl-1-oxo-3-phenyl-2,3-dihydro-1H-benzo[4,5]oxazolo[3,2-a]pyridine-4-carboxylate (3bc).** 15.4 mg, yield 44%, white solid, mp 133.0–133.9 °C, [ $\alpha$ ]<sub>D</sub><sup>27</sup> –176 (10 mg/mL in CH<sub>2</sub>Cl<sub>2</sub>). <sup>1</sup>H NMR (400 MHz, CDCl<sub>3</sub>)  $\delta$  7.80 (s, 1H), 7.29 – 7.18 (m, 6H), 7.02 (d,  $J$  = 8.0 Hz, 1H), 4.37 (dd,  $J$  = 8.0, 1.2 Hz, 1H), 4.22 (q,  $J$  = 7.2 Hz, 2H), 3.16 (dd,  $J$  = 16.8, 8.0 Hz, 1H), 2.96 (dd,  $J$  = 16.8, 2.0 Hz, 1H), 2.40 (s, 3H), 1.26 (t,  $J$  = 7.2 Hz, 3H). <sup>13</sup>C NMR (100 MHz, CDCl<sub>3</sub>)  $\delta$  166.8, 165.1, 155.9, 145.4, 142.0, 134.8, 128.9, 127.2, 126.8, 126.5, 125.7, 115.2, 109.7, 84.4, 60.2, 39.4, 36.3, 21.4, 14.4. HRMS (ESI): Exact Mass Calcd for

C<sub>21</sub>H<sub>20</sub>NO<sub>4</sub> [M+H]: 350.1387, Found: 350.1390. HPLC (Chiralpak IG column, *n*-hexane/*i*-PrOH = 90/10, flow rate = 1.0 mL/min, retention time: *t*<sub>minor</sub> = 23.994 min, *t*<sub>major</sub> = 57.284 min, 94% ee).

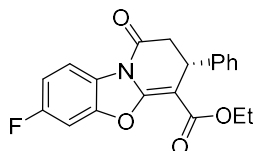

**ethyl (R)-7-fluoro-1-oxo-3-phenyl-2,3-dihydro-1H-benzo[4,5]oxazolo[3,2-*a*]pyridine-4-carboxylate (3bd).** 19.8 mg, yield 56%, white solid, mp 136.7–137.4 °C, [ $\alpha$ ]<sub>D</sub><sup>27</sup> –54 (10 mg/mL in CH<sub>2</sub>Cl<sub>2</sub>). <sup>1</sup>H NMR (400 MHz, CDCl<sub>3</sub>)  $\delta$  7.90 (dd, *J* = 8.8, 4.8 Hz, 1H), 7.30 – 7.20 (m, 5H), 7.07 (dd, *J* = 7.6, 2.4 Hz, 1H), 6.92 (dt, *J* = 9.2, 2.4 Hz, 1H), 4.39 (dd, *J* = 8.0, 1.6 Hz, 1H), 4.23 (q, *J* = 7.2 Hz, 2H), 3.16 (dd, *J* = 16.8, 8.0 Hz, 1H), 2.97 (dd, *J* = 16.8, 1.6 Hz, 1H), 1.27 (t, *J* = 7.2 Hz, 3H). <sup>13</sup>C NMR (100 MHz, CDCl<sub>3</sub>)  $\delta$  166.5, 164.8, 161.5, 159.0, 155.7, 147.9, 147.8, 141.7, 128.9, 127.4, 126.4, 123.4, 123.3, 115.0, 114.9, 111.1, 110.9, 99.7, 99.4, 85.3, 60.4, 39.1, 36.3, 14.4. HRMS (ESI): Exact Mass Calcd for C<sub>20</sub>H<sub>17</sub>FNO<sub>4</sub> [M+H]: 354.1136, Found: 354.1139. HPLC (Chiralpak IG column, *n*-hexane/*i*-PrOH = 80/20, flow rate = 1.0 mL/min, retention time: *t*<sub>minor</sub> = 11.732 min, *t*<sub>major</sub> = 13.815 min, 95% ee).

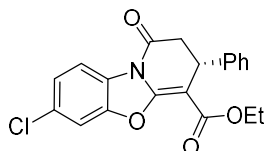

**ethyl (R)-7-chloro-1-oxo-3-phenyl-2,3-dihydro-1H-benzo[4,5]oxazolo[3,2-*a*]pyridine-4-carboxylate (3be).** 23.2 mg, yield 63%, white solid, mp 94.0–94.7 °C, [ $\alpha$ ]<sub>D</sub><sup>27</sup> –96 (10 mg/mL in CH<sub>2</sub>Cl<sub>2</sub>). <sup>1</sup>H NMR (400 MHz, CDCl<sub>3</sub>)  $\delta$  7.87 (d, *J* = 8.4 Hz, 1H), 7.31 – 7.27 (m, 3H), 7.24 – 7.17 (m, 4H), 4.39 (dd, *J* = 8.0, 1.6 Hz, 1H), 4.23 (q, *J* = 7.2 Hz, 2H), 3.16 (dd, *J* = 16.8, 8.0 Hz, 1H), 2.97 (dd, *J* = 16.8, 2.0 Hz, 1H), 1.27 (t, *J* = 7.2 Hz, 3H). <sup>13</sup>C NMR (100 MHz, CDCl<sub>3</sub>)  $\delta$  166.5, 164.8, 155.3, 147.8, 141.6, 130.9, 129.0, 127.4, 126.4, 125.8, 124.7, 115.1, 111.2, 85.3, 60.4, 39.2, 36.3, 14.4. HRMS (ESI): Exact Mass Calcd for C<sub>20</sub>H<sub>17</sub>ClNO<sub>4</sub> [M+H]: 370.0841, Found: 370.0847. HPLC (Chiralpak IG column, *n*-hexane/*i*-PrOH = 80/20, flow rate = 1.0 mL/min, retention time: *t*<sub>minor</sub> = 13.469 min, *t*<sub>major</sub> = 15.732 min, 91% ee).

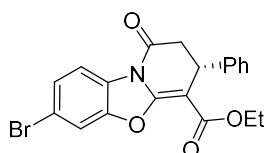

ethyl (R)-7-bromo-1-oxo-3-phenyl-2,3-dihydro-1H-benzo[4,5]oxazolo[3,2-a]pyridine-4-carboxylate (3bf). 22.7 mg, yield 55%, pale yellow solid, mp 101.7–102.3 °C,  $[\alpha]_D^{27}$  –68 (10 mg/mL in CH<sub>2</sub>Cl<sub>2</sub>). <sup>1</sup>H NMR (400 MHz, CDCl<sub>3</sub>)  $\delta$  7.81 (d, *J* = 8.4 Hz, 1H), 7.45 (d, *J* = 1.6 Hz, 1H), 7.33 (dd, *J* = 8.4, 1.6 Hz, 1H), 7.30 – 7.27 (m, 2H), 7.26 – 7.20 (m, 3H), 4.38 (dd, *J* = 8.0, 2.0 Hz, 1H), 4.22 (q, *J* = 7.2 Hz, 2H), 3.15 (dd, *J* = 16.8, 8.0 Hz, 1H), 2.97 (dd, *J* = 16.8, 2.0 Hz, 1H), 1.26 (t, *J* = 7.2 Hz, 3H). <sup>13</sup>C NMR (100 MHz, CDCl<sub>3</sub>)  $\delta$  166.6, 164.8, 155.2, 147.9, 141.6, 129.0, 127.6, 127.4, 126.4, 126.3, 117.9, 115.5, 113.9, 85.3, 60.4, 39.2, 36.3, 14.4. HRMS (ESI): Exact Mass Calcd for C<sub>20</sub>H<sub>17</sub>BrNO<sub>4</sub> [M+H]: 414.0335, Found: 414.0341. HPLC (Chiralpak IG column, *n*-hexane/*i*-PrOH = 80/20, flow rate = 1.0 mL/min, retention time: *t*<sub>minor</sub> = 15.216 min, *t*<sub>major</sub> = 18.075 min, 91% ee).

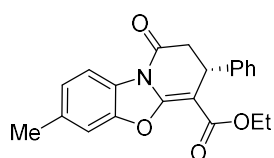

ethyl (R)-7-methyl-1-oxo-3-phenyl-2,3-dihydro-1H-benzo[4,5]oxazolo[3,2-a]pyridine-4-carboxylate (3bg). 19.3 mg, yield 55%, yellow solid, mp 119.5–120.2 °C,  $[\alpha]_D^{27}$  –36 (10 mg/mL in CH<sub>2</sub>Cl<sub>2</sub>). <sup>1</sup>H NMR (400 MHz, CDCl<sub>3</sub>)  $\delta$  7.82 (d, *J* = 8.0 Hz, 1H), 7.29 – 7.26 (m, 1H), 7.25 – 7.19 (m, 4H), 7.13 (s, 1H), 7.01 (d, *J* = 7.6 Hz, 1H), 4.37 (dd, *J* = 8.0, 2.0 Hz, 1H), 4.22 (q, *J* = 7.2 Hz, 2H), 3.16 (dd, *J* = 16.8, 8.0 Hz, 1H), 2.96 (dd, *J* = 16.8, 2.0 Hz, 1H), 2.42 (s, 3H), 1.27 (t, *J* = 7.2 Hz, 3H). <sup>13</sup>C NMR (100 MHz, CDCl<sub>3</sub>)  $\delta$  166.6, 165.1, 155.8, 147.5, 142.0, 136.0, 128.9, 127.2, 126.5, 125.0, 124.5, 114.2, 110.9, 84.4, 60.2, 39.3, 36.3, 21.6, 14.4. HRMS (ESI): Exact Mass Calcd for C<sub>21</sub>H<sub>20</sub>NO<sub>4</sub> [M+H]: 350.1387, Found: 350.1386. HPLC (Chiralpak IG column, *n*-hexane/*i*-PrOH = 80/20, flow rate = 1.0 mL/min, retention time: *t*<sub>minor</sub> = 16.425 min, *t*<sub>major</sub> = 21.803 min, 96% ee).

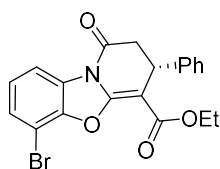

ethyl (R)-6-bromo-1-oxo-3-phenyl-2,3-dihydro-1H-benzo[4,5]oxazolo[3,2-a]pyridine-4-carboxylate (3bh). 22.7 mg, yield 55%, yellow oil,  $[\alpha]_D^{28}$  –39 (10 mg/mL in CH<sub>2</sub>Cl<sub>2</sub>). <sup>1</sup>H NMR (400 MHz, CDCl<sub>3</sub>)  $\delta$  7.89 (d, *J* = 8.0 Hz, 1H), 7.36 (d, *J* = 8.0 Hz, 1H), 7.30 – 7.28 (m, 2H), 7.25 – 7.20 (m, 3H), 7.09 (t, *J* = 8.0 Hz, 1H), 4.40 (dd, *J* = 7.6, 1.6 Hz, 1H), 4.26 (q, *J* = 7.2 Hz, 2H), 3.16 (dd, *J* = 16.8, 7.6 Hz, 1H), 2.99 (dd, *J* =



16.8, 2.0 Hz, 1H), 1.34 (t,  $J = 7.2$  Hz, 3H).  $^{13}\text{C}$  NMR (100 MHz,  $\text{CDCl}_3$ )  $\delta$  166.8, 164.9, 154.6, 145.4, 141.5, 129.0, 128.6, 127.9, 127.4, 126.4, 125.8, 113.5, 102.4, 85.6, 60.5, 39.2, 36.1, 14.3. HRMS (ESI): Exact Mass Calcd for  $\text{C}_{20}\text{H}_{17}\text{BrNO}_4$  [ $\text{M}+\text{H}$ ]: 414.0335, Found: 414.0334. HPLC (Chiralpak IG column, *n*-hexane/*i*-PrOH = 80/20, flow rate = 1.0 mL/min, retention time:  $t_{\text{major}} = 10.022$  min,  $t_{\text{minor}} = 11.737$  min, 84% ee).

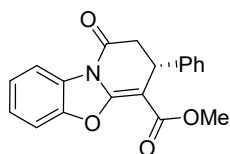

**methyl (*R*)-1-oxo-3-phenyl-2,3-dihydro-1*H*-benzo[4,5]oxazolo[3,2-*a*]pyridine-4-carboxylate (3bi).** 20.1 mg, yield 63%, white solid, mp 199.3–200.4 °C,  $[\alpha]_{\text{D}}^{28} -162$  (10 mg/mL in  $\text{CH}_2\text{Cl}_2$ ).  $^1\text{H}$  NMR (400 MHz,  $\text{CDCl}_3$ )  $\delta$  7.98 – 7.96 (m, 1H), 7.34 – 7.32 (m, 3H), 7.31 – 7.19 (m, 5H), 4.39 (dd,  $J = 8.0, 1.6$  Hz, 1H), 3.78 (s, 3H), 3.17 (dd,  $J = 16.8, 8.0$ , 1H), 2.98 (dd,  $J = 16.8, 1.6$  Hz, 1H).  $^{13}\text{C}$  NMR (100 MHz,  $\text{CDCl}_3$ )  $\delta$  166.7, 165.5, 155.7, 147.3, 141.7, 129.0, 127.3, 126.9, 126.4, 125.5, 124.7, 114.8, 110.3, 84.2, 51.6, 39.4, 36.3. HRMS (ESI): Exact Mass Calcd for  $\text{C}_{19}\text{H}_{16}\text{NO}_4$  [ $\text{M}+\text{H}$ ]: 322.1074, Found: 322.1079. HPLC (Chiralpak IG column, *n*-hexane/*i*-PrOH = 80/20, flow rate = 1.0 mL/min, retention time:  $t_{\text{minor}} = 14.080$  min,  $t_{\text{major}} = 18.031$  min, 89% ee).

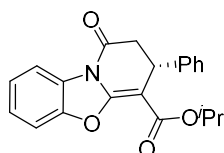

**isopropyl (*R*)-1-oxo-3-phenyl-2,3-dihydro-1*H*-benzo[4,5]oxazolo[3,2-*a*]pyridine-4-carboxylate (3bj).** 12.4 mg, yield 37%, white solid, mp 130.7–131.4 °C,  $[\alpha]_{\text{D}}^{28} -134$  (10 mg/mL in  $\text{CH}_2\text{Cl}_2$ ).  $^1\text{H}$  NMR (400 MHz,  $\text{CDCl}_3$ )  $\delta$  7.98 – 7.96 (m, 1H), 7.32 – 7.27 (m, 2H), 7.25 – 7.18 (m, 6H), 5.13 – 5.04 (m, 1H), 4.36 (dd,  $J = 8.0, 2.0$  Hz, 1H), 3.18 (dd,  $J = 16.8, 8.0$  Hz, 1H), 2.97 (dd,  $J = 16.8, 2.0$  Hz, 1H), 1.29 (d,  $J = 6.0$  Hz, 3H), 1.15 (d,  $J = 6.4$  Hz, 3H).  $^{13}\text{C}$  NMR (100 MHz,  $\text{CDCl}_3$ )  $\delta$  166.7, 164.5, 155.4, 147.3, 142.1, 128.8, 127.2, 126.8, 126.5, 125.4, 124.6, 114.7, 110.3, 85.0, 67.6, 39.3, 36.3, 22.1, 21.8. HRMS (ESI): Exact Mass Calcd for  $\text{C}_{21}\text{H}_{20}\text{NO}_4$  [ $\text{M}+\text{H}$ ]: 350.1387, Found: 350.1390. HPLC (Chiralpak IG column, *n*-hexane/*i*-PrOH = 90/10, flow rate = 1.0 mL/min, retention time:  $t_{\text{minor}} = 16.314$  min,  $t_{\text{major}} = 21.889$  min, 94% ee).

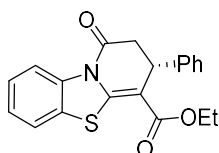

**ethyl (R)-1-oxo-3-phenyl-2,3-dihydro-1H-benzo[4,5]thiazolo[3,2-a]pyridine-4-carboxylate (3bk).** 27.2 mg, yield 77%, pale yellow solid, mp 117.9–118.9 °C,  $[\alpha]_D^{28}$   $-184$  (10 mg/mL in  $\text{CH}_2\text{Cl}_2$ ).  $^1\text{H}$  NMR (400 MHz,  $\text{CDCl}_3$ )  $\delta$  8.44 (d,  $J = 8.8$  Hz, Hz, 1H), 7.44 (dd,  $J = 7.6, 1.2$  Hz, 1H), 7.31 – 7.28 (m, 1H), 7.26 – 7.19 (m, 6H), 4.33 (dd,  $J = 8.0, 1.6$  Hz, 1H), 4.29 – 4.15 (m, 2H), 3.24 (dd,  $J = 16.4, 8.0$  Hz, 1H), 3.02 (dd,  $J = 16.4, 2.0$  Hz, 1H), 1.24 (t,  $J = 7.2$  Hz, 3H).  $^{13}\text{C}$  NMR (100 MHz,  $\text{CDCl}_3$ )  $\delta$  168.3, 166.6, 152.3, 141.5, 136.8, 128.9, 127.3, 127.0, 126.6, 126.5, 125.5, 121.4, 117.4, 100.4, 60.7, 40.2, 36.8, 14.4. HRMS (ESI): Exact Mass Calcd for  $\text{C}_{20}\text{H}_{18}\text{NO}_3\text{S}$   $[\text{M}+\text{H}]$ : 352.1002, Found: 352.1004. HPLC (Chiralpak IG column, *n*-hexane/*i*-PrOH = 80/20, flow rate = 1.0 mL/min, retention time:  $t_{\text{minor}} = 11.595$  min,  $t_{\text{major}} = 31.216$  min, 82% ee).

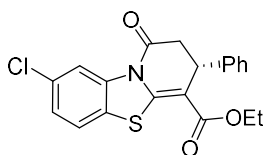

**ethyl (R)-8-chloro-1-oxo-3-phenyl-2,3-dihydro-1H-benzo[4,5]thiazolo[3,2-a]pyridine-4-carboxylate (3bl).** 32.4 mg, yield 84%, pale yellow solid, mp 156.6–157.4 °C,  $[\alpha]_D^{28}$   $-257$  (10 mg/mL in  $\text{CH}_2\text{Cl}_2$ ).  $^1\text{H}$  NMR (400 MHz,  $\text{CDCl}_3$ )  $\delta$  8.40 (d,  $J = 1.6$  Hz, 1H), 7.27 (d,  $J = 8.4$  Hz, 1H), 7.22 – 7.10 (m, 6H), 4.26 (d,  $J = 6.8$  Hz, 1H), 4.22 – 4.07 (m, 2H), 3.17 (dd,  $J = 16.4, 8.0$  Hz, 1H), 2.96 (dd,  $J = 16.4, 1.6$  Hz, 1H), 1.16 (t,  $J = 7.2$  Hz, 3H).  $^{13}\text{C}$  NMR (100 MHz,  $\text{CDCl}_3$ )  $\delta$  168.1, 166.5, 152.1, 141.2, 137.6, 132.5, 129.0, 127.4, 126.5, 125.61, 125.58, 122.0, 117.8, 101.0, 60.9, 40.0, 36.7, 14.3. HRMS (ESI): Exact Mass Calcd for  $\text{C}_{20}\text{H}_{17}\text{ClNO}_3\text{S}$   $[\text{M}+\text{H}]$ : 386.0612, Found: 386.0610. HPLC (Chiralpak IG column, *n*-hexane/*i*-PrOH = 80/20, flow rate = 1.0 mL/min, retention time:  $t_{\text{minor}} = 11.463$  min,  $t_{\text{major}} = 35.195$  min, 85% ee).

### 3. Scale-up synthesis of product 3aa

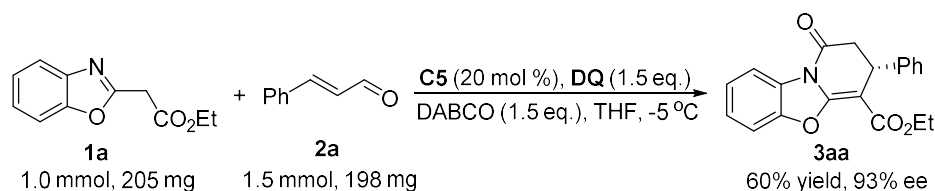

A dried and nitrogen-filled Schlenk tube was charged with ethyl 2-(benzo[*d*]oxazol-2-yl)acetate (**1a**) (1 mmol, 205 mg), cinnamaldehyde (**2a**) (1.5 mmol, 198 mg), NHC precatalyst **C5** (0.2 mmol, 99 mg), DABCO

(1.5 mmol, 168 mg) and DQ (1.5 mmol, 612 mg) in dry THF (2 mL). The reaction mixture was stirred at  $-5$  °C until the consumption of substrate **1a** as monitored by TLC. The solvent was removed in vacuo and the residue was purified by chromatography on silica gel using petroleum ether/EtOAc (10:1) as eluent to afford the product **3aa** (201 mg, 60% yield, 93% ee).

#### 4. Synthetic transformations of product **3aa**

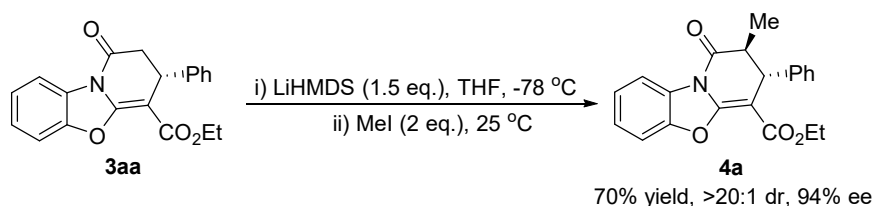

To a stirred solution of **3aa** (33.5 mg, 0.1 mmol) in anhydrous THF (1 mL) at  $-78$  °C was added LiHMDS (1 M in THF, 0.15 mL, 0.15 mmol), and the solution was stirred for 2 h. The iodomethane (28.4 mg, 0.2 mmol) was added dropwise. After that, the temperature of the reaction mixture was slowly raised to room temperature and continued to stir for 20 h at room temperature. After completion of the reaction monitored by TLC, H<sub>2</sub>O (1 mL) was added. The organic layer was collected, and the aqueous layer was extracted with EtOAc (10 mL $\times$ 3). The combined organic phase was washed with brine, dried over MgSO<sub>4</sub>, filtered, and concentrated under reduced pressure. The residue was purified by flash chromatography on silica gel using petroleum ether/ethyl acetate (10:1) as eluent to afford product **4a**.

**ethyl (2S,3R)-2-methyl-1-oxo-3-phenyl-2,3-dihydro-1H-benzo[4,5]oxazolo[3,2-a]pyridine-4-carboxylate (4a)**. 24.5 mg, 70%. white solid, mp 111.6–112.5 °C,  $[\alpha]_{\text{D}}^{28}$   $-232$  (10 mg/mL in CH<sub>2</sub>Cl<sub>2</sub>). <sup>1</sup>H NMR (400 MHz, CDCl<sub>3</sub>)  $\delta$  7.99 – 7.96 (m, 1H), 7.34 – 7.32 (m, 1H), 7.28 – 7.18 (m, 7H), 4.28 – 4.16 (m, 2H), 4.03 (d,  $J$  = 1.6 Hz, 1H), 3.02 – 2.97 (m, 1H), 1.45 (d,  $J$  = 7.6 Hz, 3H), 1.26 (t,  $J$  = 7.2 Hz, 3H). <sup>13</sup>C NMR (100 MHz, CDCl<sub>3</sub>)  $\delta$  170.4, 165.5, 154.5, 147.5, 142.1, 128.9, 127.2, 127.0, 126.5, 125.5, 124.6, 114.8, 110.3, 82.6, 60.3, 44.6, 44.3, 18.1, 14.4. HRMS (ESI): Exact Mass Calcd for C<sub>21</sub>H<sub>20</sub>NO<sub>4</sub> [M+H]<sup>+</sup>: 350.1387, Found: 350.1390. HPLC (Chiralpak OD–H column, *n*-hexane/*i*-PrOH = 95/5, flow rate = 1.0 mL/min, retention time:  $t_{\text{minor}}$  = 9.720 min,  $t_{\text{major}}$  = 11.993 min, 94% ee).

## 5. Single crystal XRD data of compound 3aa

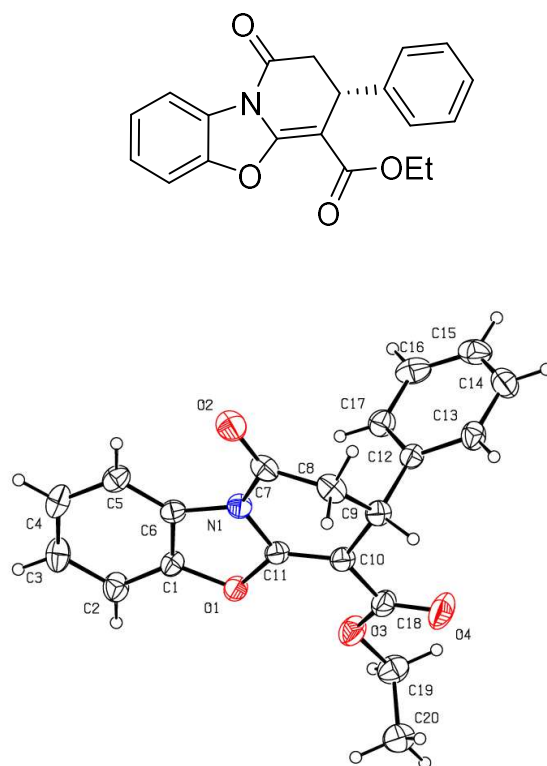

Figure 1. X-ray crystallography of compound 3aa

### Crystal data and structure refinement for 3aa

---

|                                             |                                                               |
|---------------------------------------------|---------------------------------------------------------------|
| Identification code                         | <b>3aa</b>                                                    |
| Empirical formula                           | C <sub>20</sub> H <sub>17</sub> NO <sub>4</sub>               |
| Formula weight                              | 335.35                                                        |
| Temperature/K                               | 292.97(10)                                                    |
| Crystal system                              | Monoclinic                                                    |
| Space group                                 | P2 <sub>1</sub>                                               |
| a/Å                                         | 10.2921(7)                                                    |
| b/Å                                         | 5.9894(4)                                                     |
| c/Å                                         | 13.4049(8)                                                    |
| α/°                                         | 90                                                            |
| β/°                                         | 97.129(6)                                                     |
| γ/°                                         | 90                                                            |
| Volume/Å <sup>3</sup>                       | 819.94(9)                                                     |
| Z                                           | 2                                                             |
| ρ <sub>calc</sub> /cm <sup>3</sup>          | 1.358                                                         |
| μ/mm <sup>-1</sup>                          | 0.780                                                         |
| F(000)                                      | 352.0                                                         |
| Crystal size/mm <sup>3</sup>                | 0.16 × 0.05 × 0.03                                            |
| Radiation                                   | Cu Kα (λ = 1.54184)                                           |
| 2θ range for data collection/°              | 8.658 to 133.162                                              |
| Index ranges                                | -12 ≤ h ≤ 11, -7 ≤ k ≤ 7, -15 ≤ l ≤ 11                        |
| Reflections collected                       | 6045                                                          |
| Independent reflections                     | 2896 [R <sub>int</sub> = 0.0352, R <sub>sigma</sub> = 0.0350] |
| Data/restraints/parameters                  | 2896/19/228                                                   |
| Goodness-of-fit on F <sup>2</sup>           | 1.035                                                         |
| Final R indexes [I ≥ 2σ (I)]                | R <sub>1</sub> = 0.0486, wR <sub>2</sub> = 0.1322             |
| Final R indexes [all data]                  | R <sub>1</sub> = 0.0505, wR <sub>2</sub> = 0.1352             |
| Largest diff. peak/hole / e Å <sup>-3</sup> | 0.49/-0.24                                                    |
| Flack parameter                             | -0.04(16)                                                     |

---

## 6. References

- (1) Zhao, C.; Li, F.; Wang, J. *Angew. Chem., Int. Ed.* **2016**, *55*, 1820–1824.
- (2) (a) Waetzig, S. R.; Tunge, J. A. *J. Am. Chem. Soc.* **2007**, *129*, 4138–4139; (b) Shang, R.; Yang, Z.-W.; Wang, Y.; Zhang, S.-L.; Liu, L. *J. Am. Chem. Soc.* **2010**, *132*, 14391–14391.
- (3) Kulhánek, J.; Bureš, S.; Pytela, O.; Mikysek, T.; Ludvík, J. *Chem. Asian J.* **2011**, *6*, 1604–1612.

## 7. NMR spectra of the compounds 3aa–3bl and 4a

$^1\text{H}$  NMR spectrum of compound **3aa** ( $\text{CDCl}_3$ , 400 MHz)

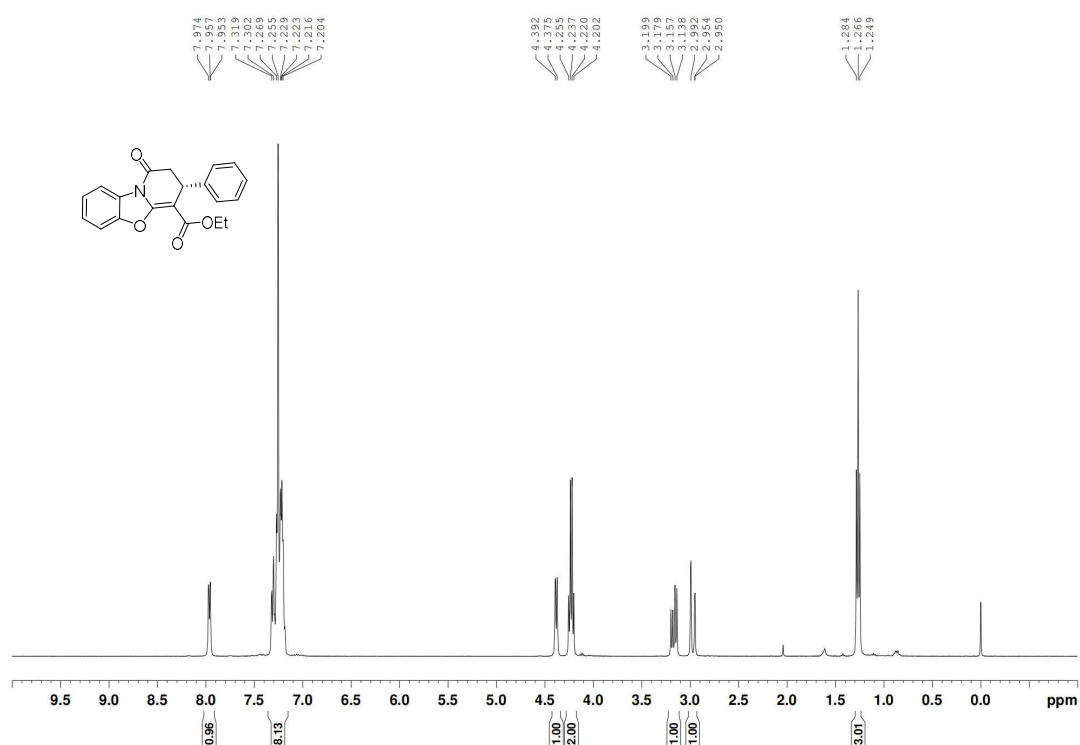

$^{13}\text{C}$  NMR spectrum of compound **3aa** ( $\text{CDCl}_3$ , 100 MHz)

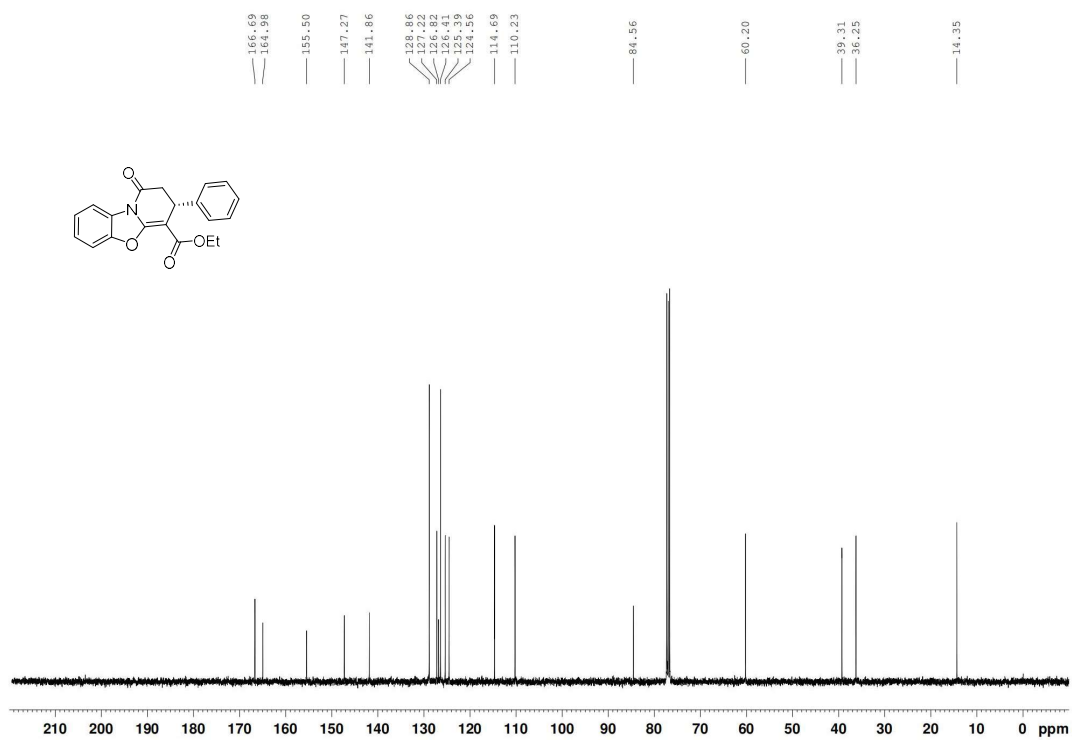

<sup>1</sup>H NMR spectrum of compound **3ab** (CDCl<sub>3</sub>, 400 MHz)

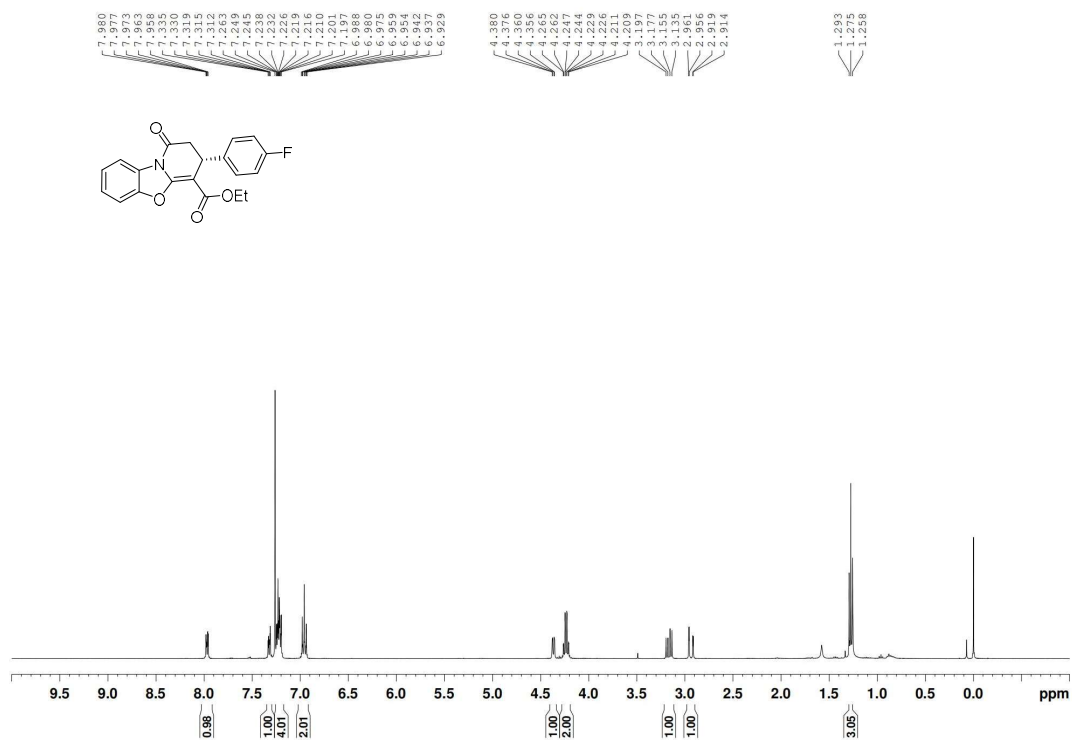

<sup>13</sup>C NMR spectrum of compound **3ab** (CDCl<sub>3</sub>, 100 MHz)

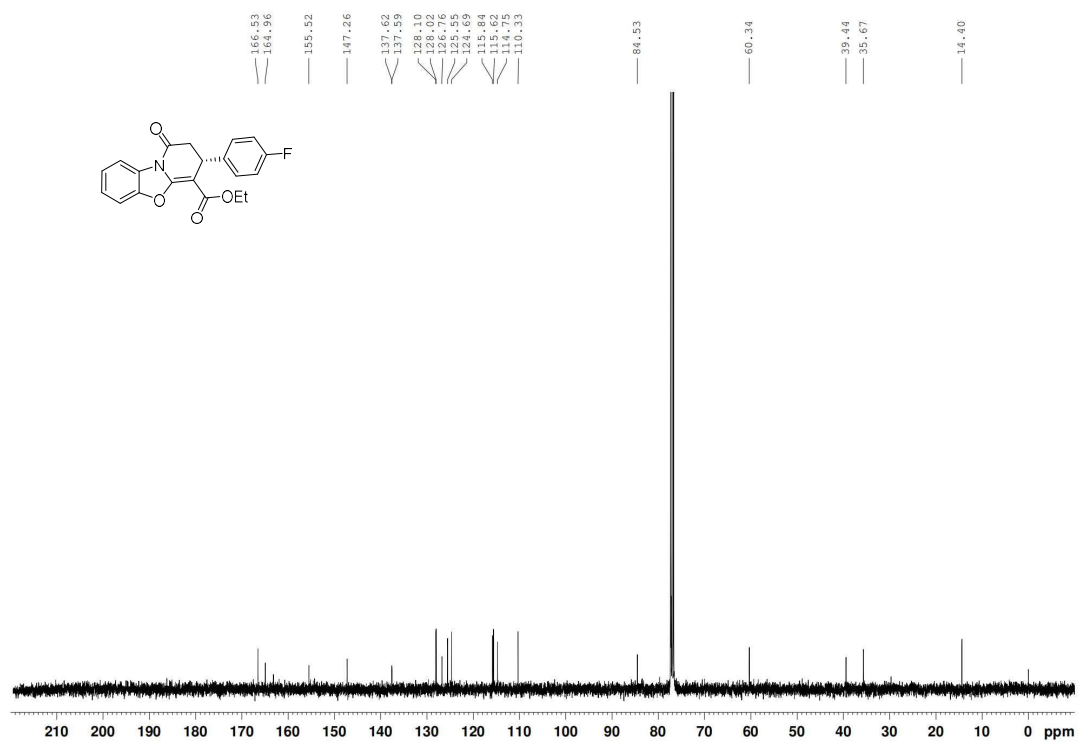



<sup>1</sup>H NMR spectrum of compound **3ac** (CDCl<sub>3</sub>, 400 MHz)

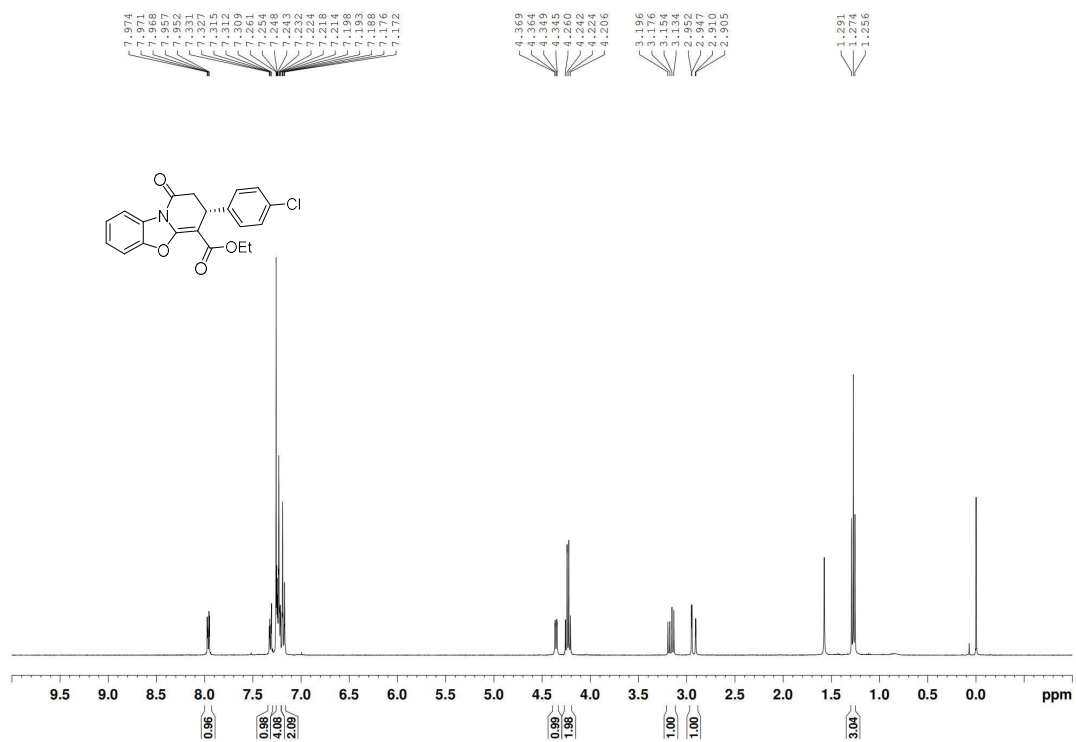

<sup>13</sup>C NMR spectrum of compound **3ac** (CDCl<sub>3</sub>, 100 MHz)

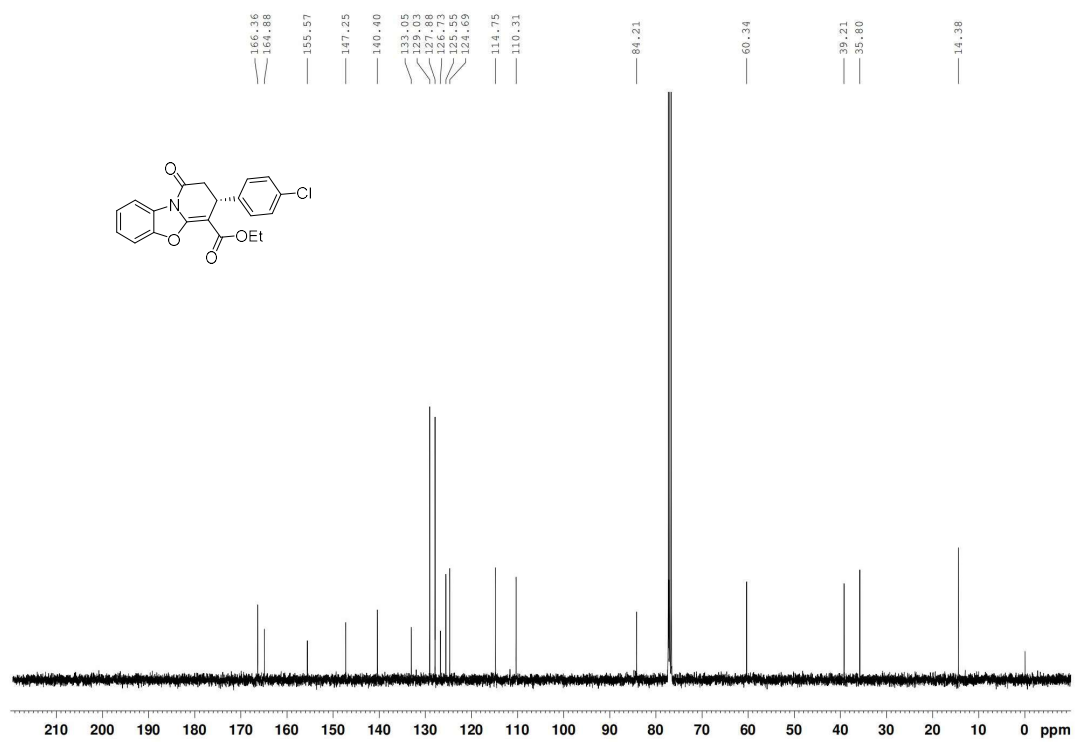

<sup>1</sup>H NMR spectrum of compound **3ad** (CDCl<sub>3</sub>, 400 MHz)

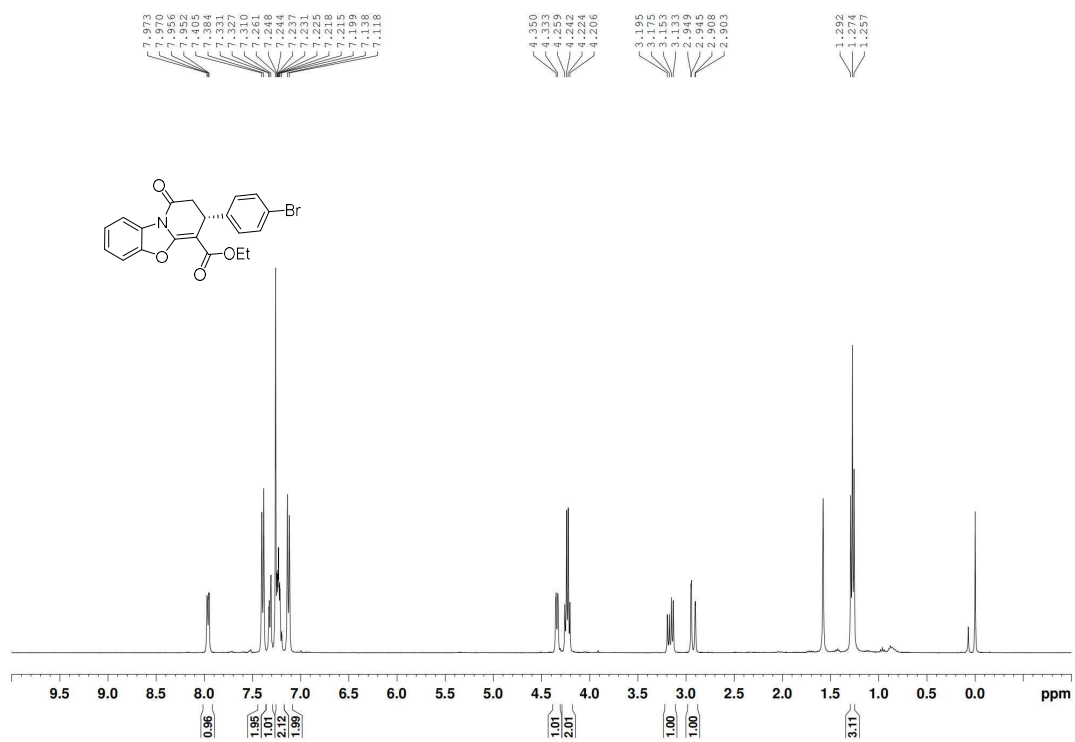

<sup>13</sup>C NMR spectrum of compound **3ad** (CDCl<sub>3</sub>, 100 MHz)

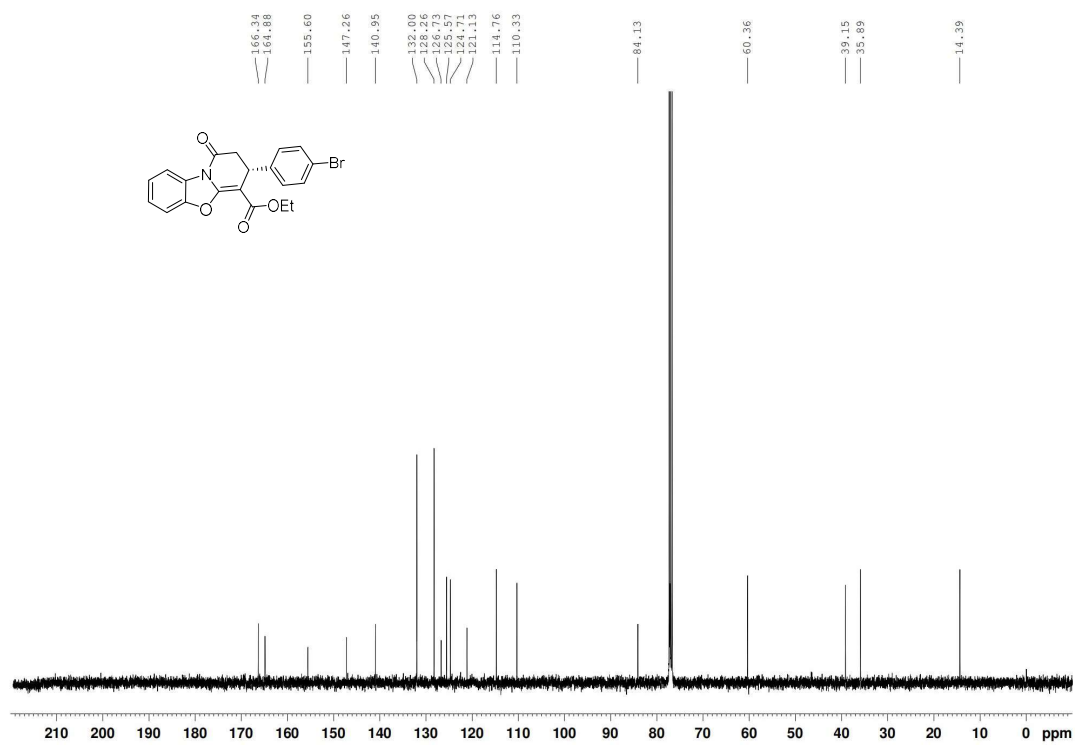

<sup>1</sup>H NMR spectrum of compound **3ae** (CDCl<sub>3</sub>, 400 MHz)

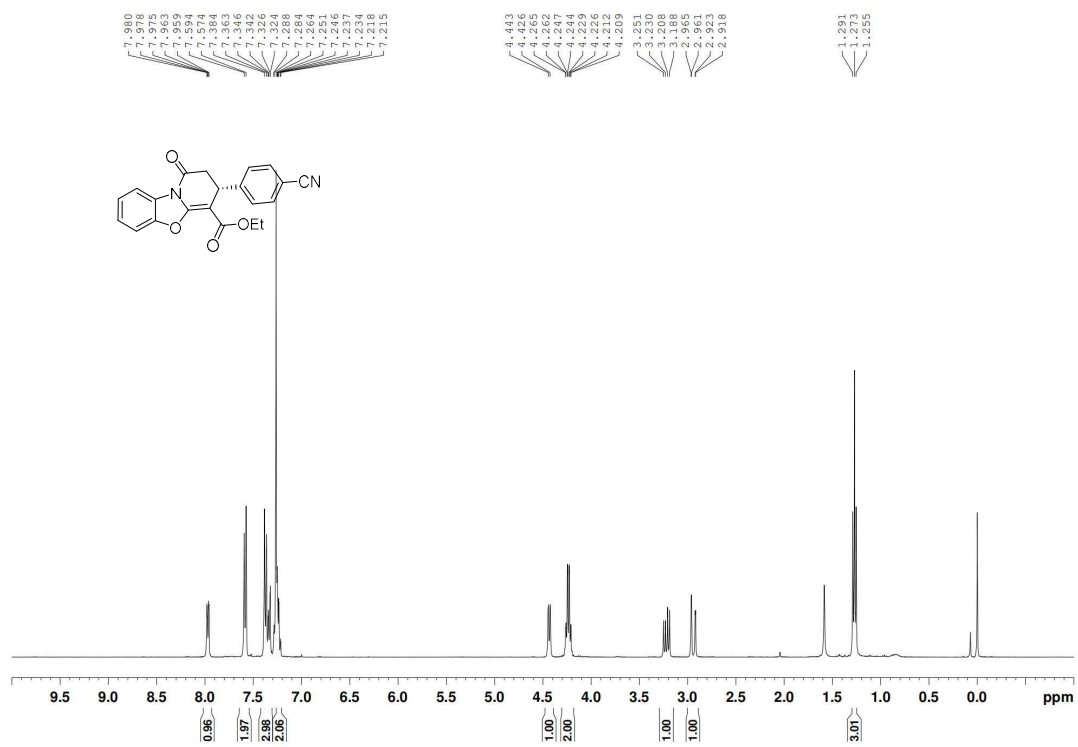

<sup>13</sup>C NMR spectrum of compound **3ae** (CDCl<sub>3</sub>, 100 MHz)

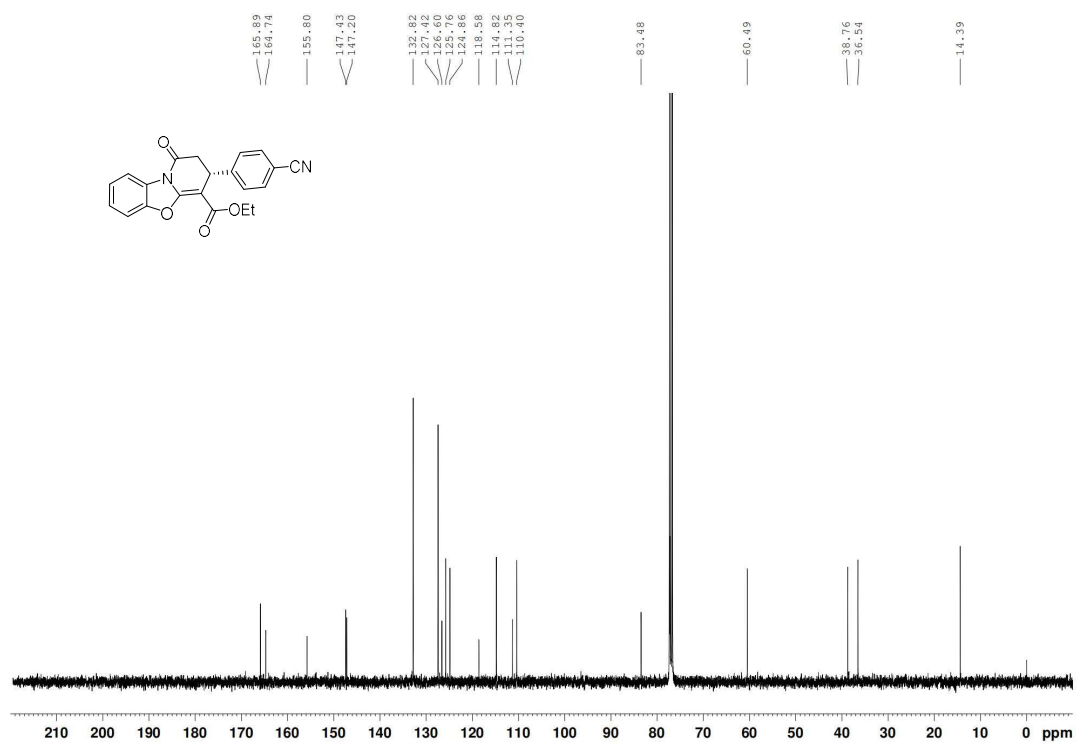

<sup>1</sup>H NMR spectrum of compound **3af** (CDCl<sub>3</sub>, 400 MHz)

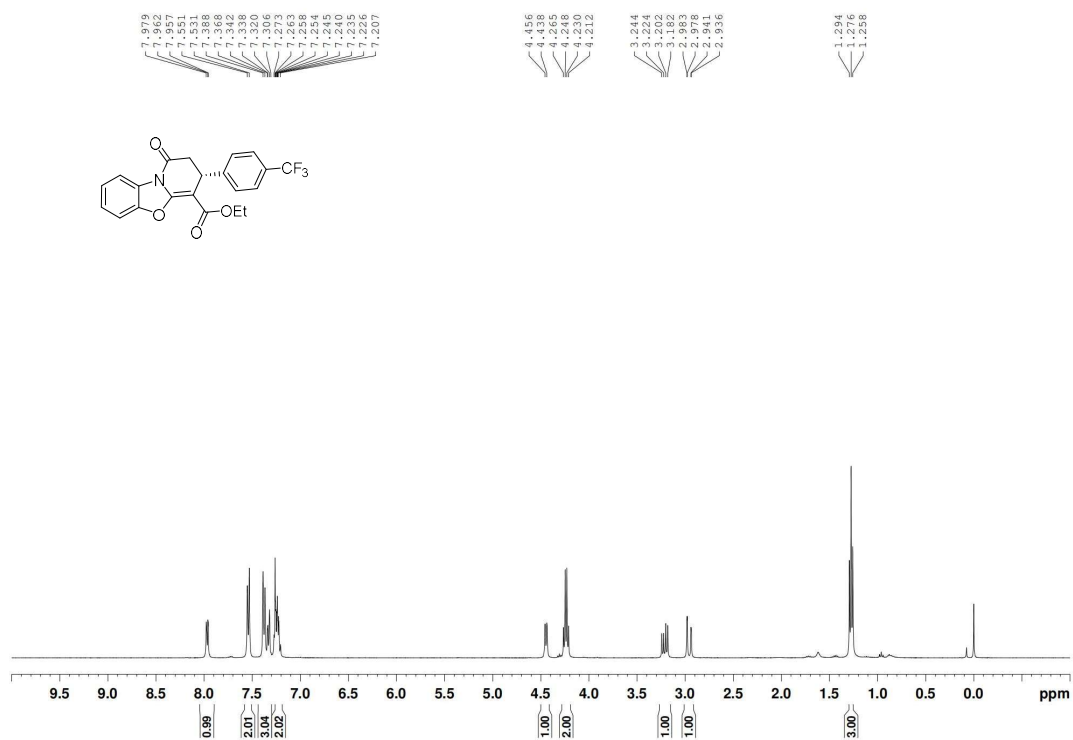

<sup>13</sup>C NMR spectrum of compound **3af** (CDCl<sub>3</sub>, 100 MHz)

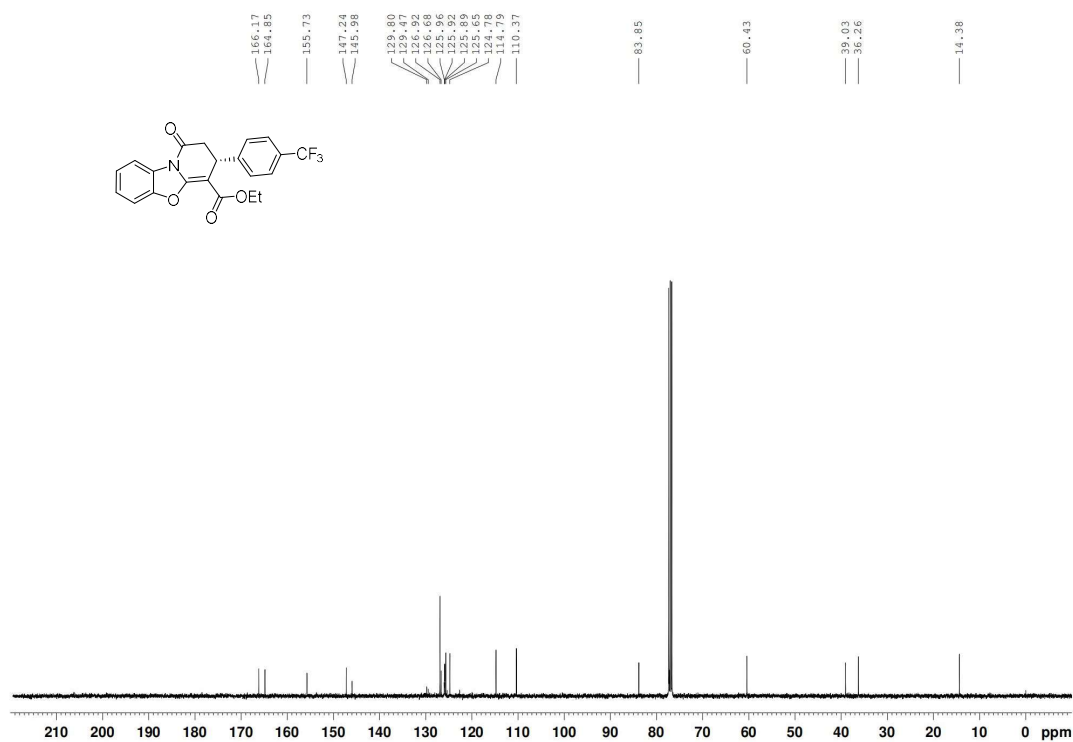

<sup>1</sup>H NMR spectrum of compound **3ag** (CDCl<sub>3</sub>, 400 MHz)

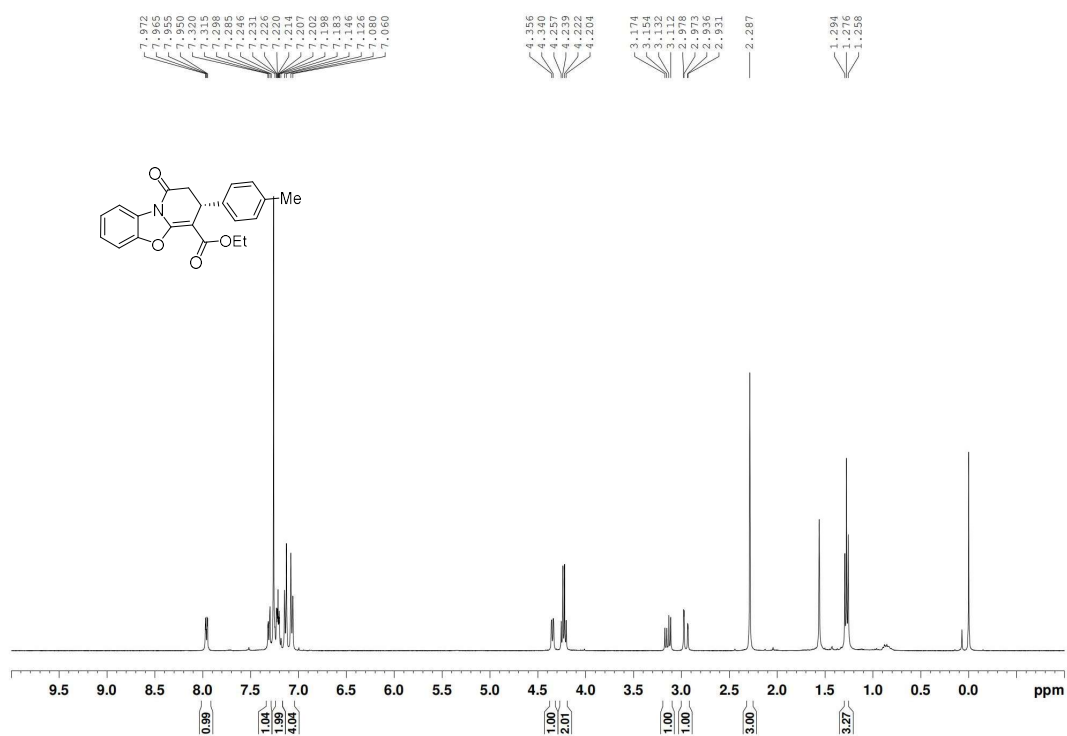

<sup>13</sup>C NMR spectrum of compound **3ag** (CDCl<sub>3</sub>, 100 MHz)

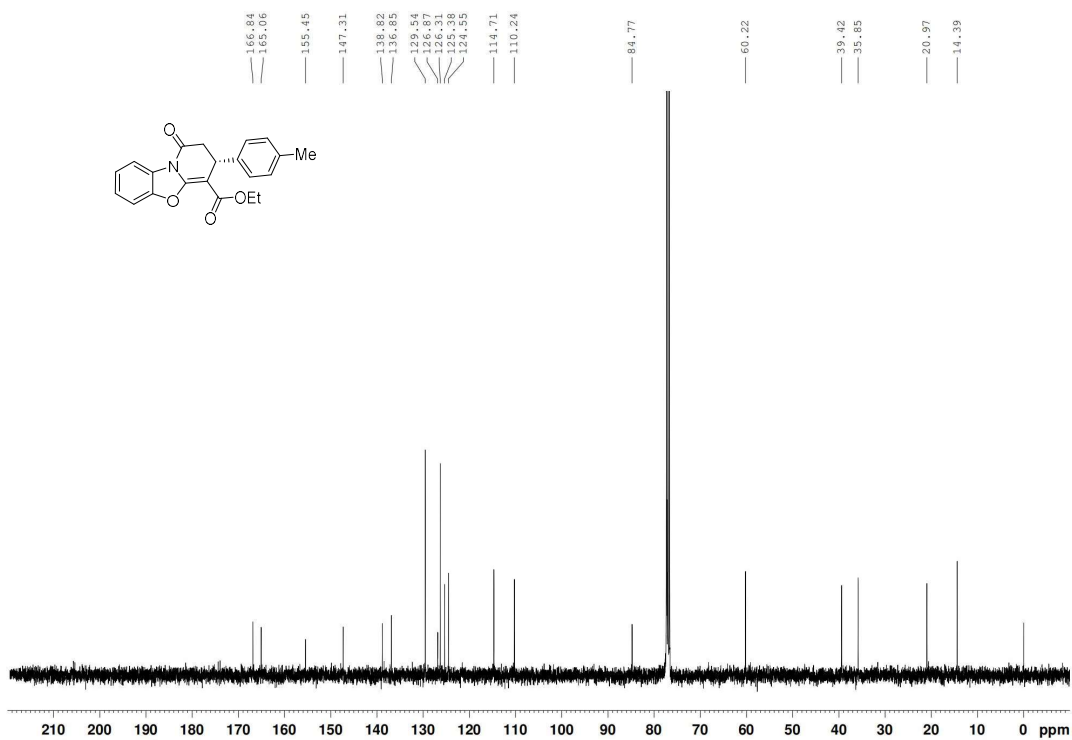

<sup>1</sup>H NMR spectrum of compound **3ah** (CDCl<sub>3</sub>, 400 MHz)

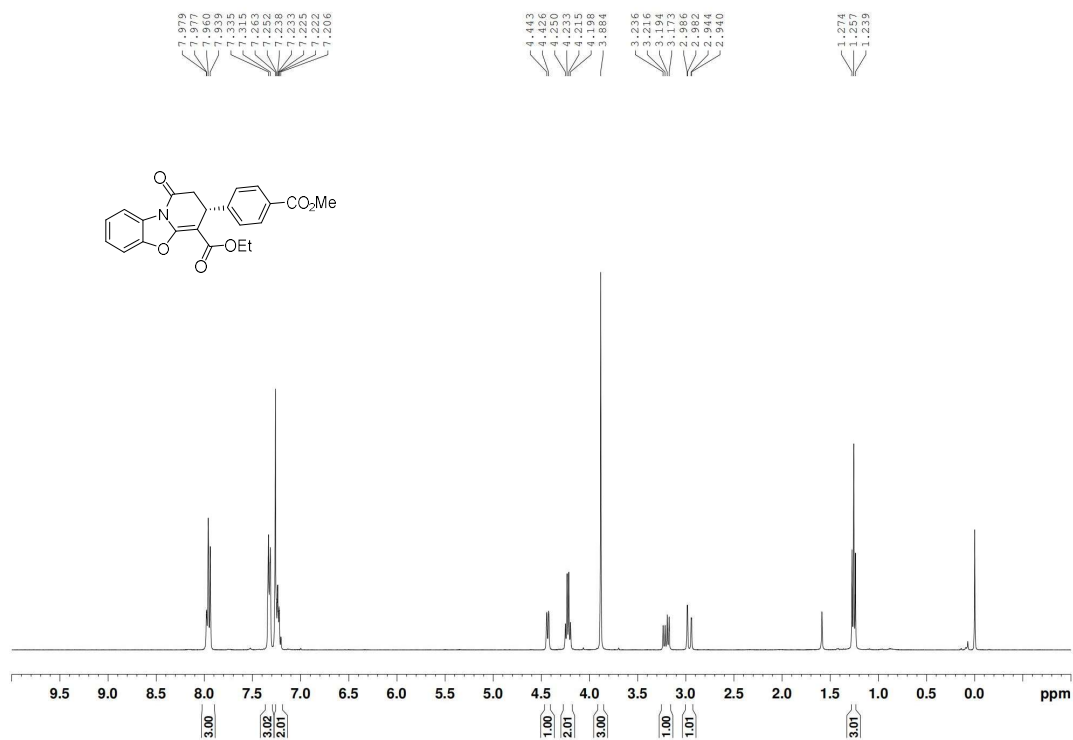

<sup>13</sup>C NMR spectrum of compound **3ah** (CDCl<sub>3</sub>, 100 MHz)

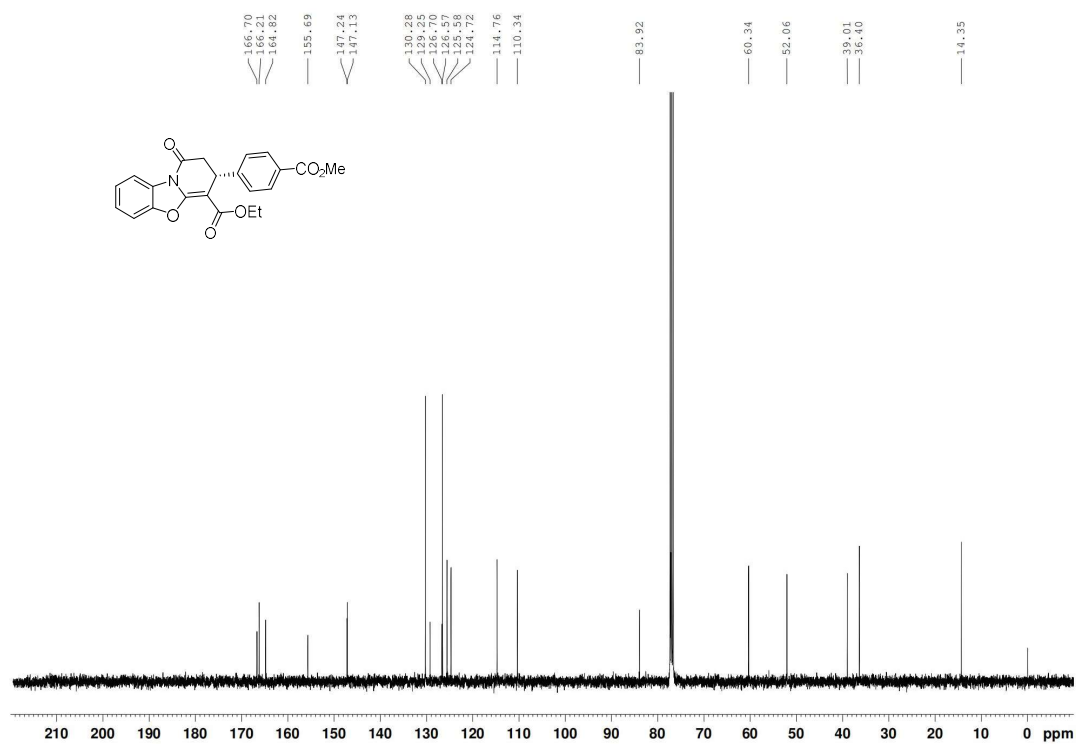

<sup>1</sup>H NMR spectrum of compound **3ai** (CDCl<sub>3</sub>, 400 MHz)

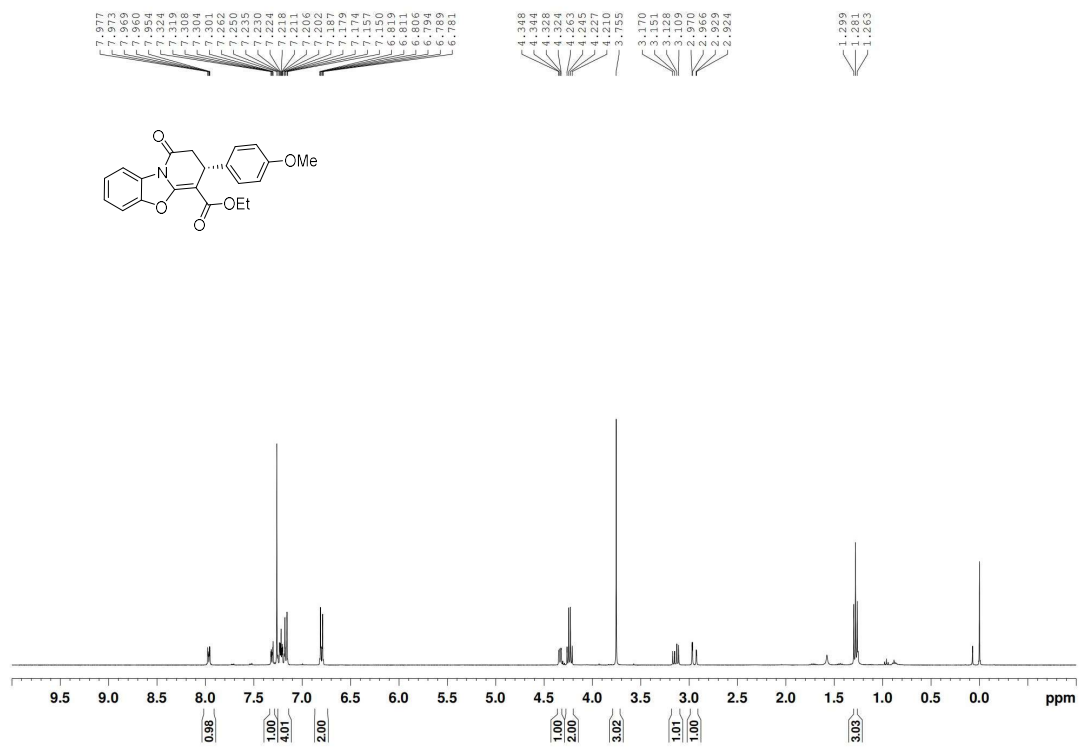

<sup>13</sup>C NMR spectrum of compound **3ai** (CDCl<sub>3</sub>, 100 MHz)

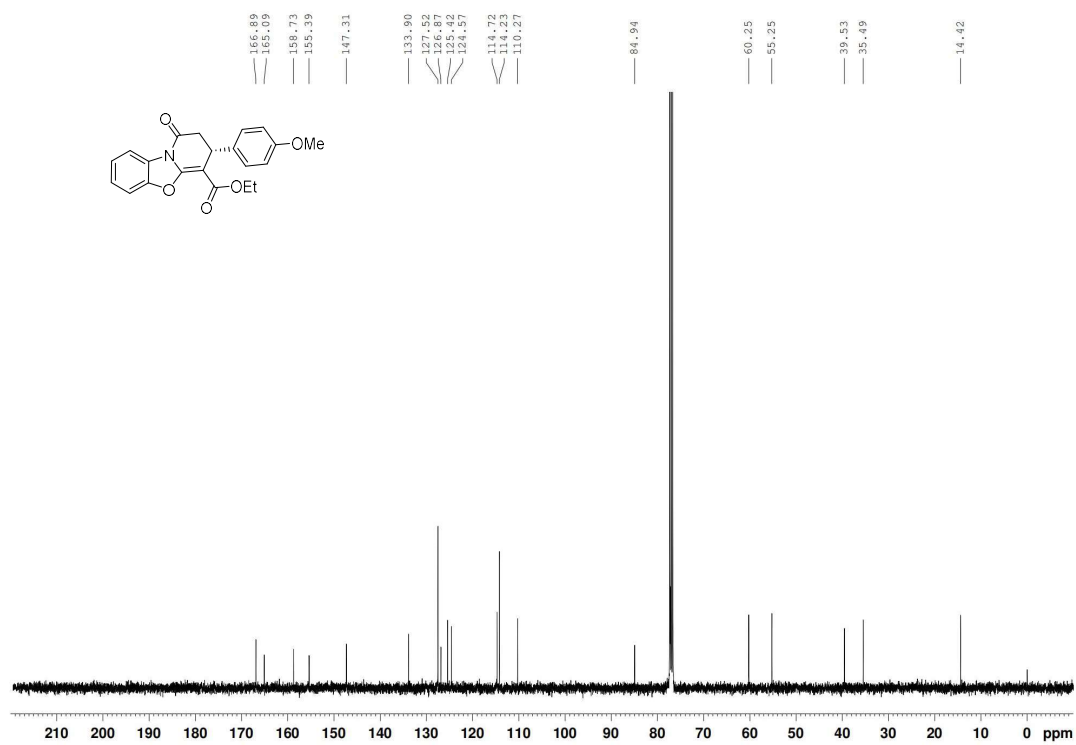

<sup>1</sup>H NMR spectrum of compound **3aj** (CDCl<sub>3</sub>, 400 MHz)

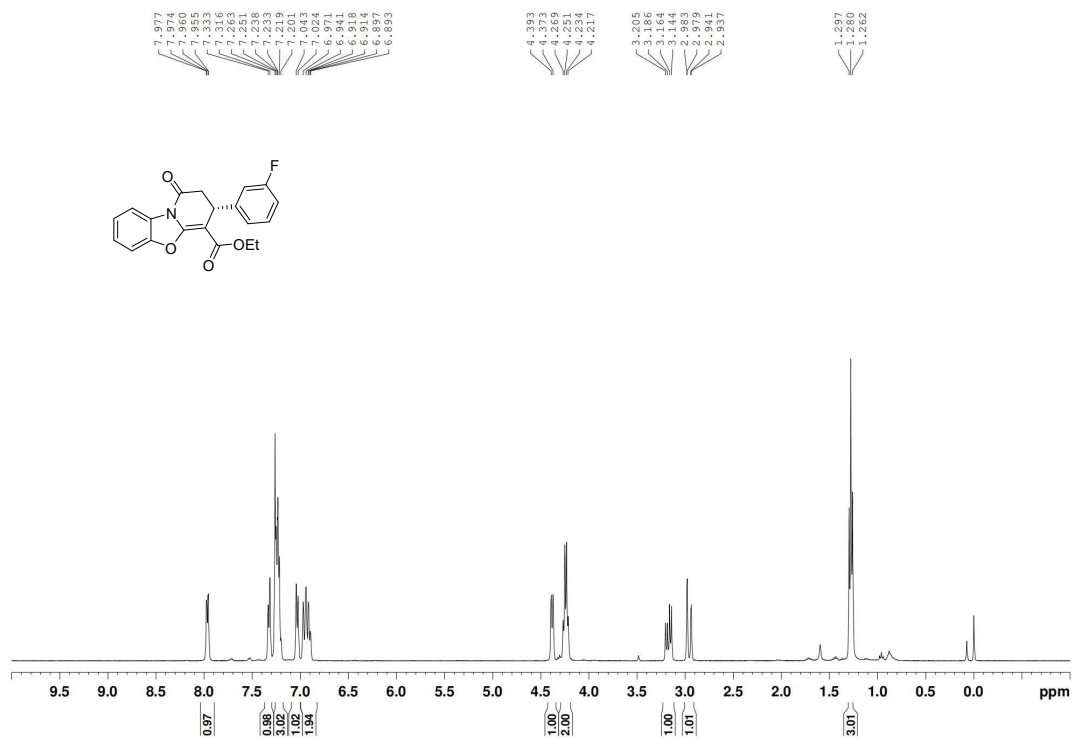

<sup>13</sup>C NMR spectrum of compound **3aj** (CDCl<sub>3</sub>, 100 MHz)

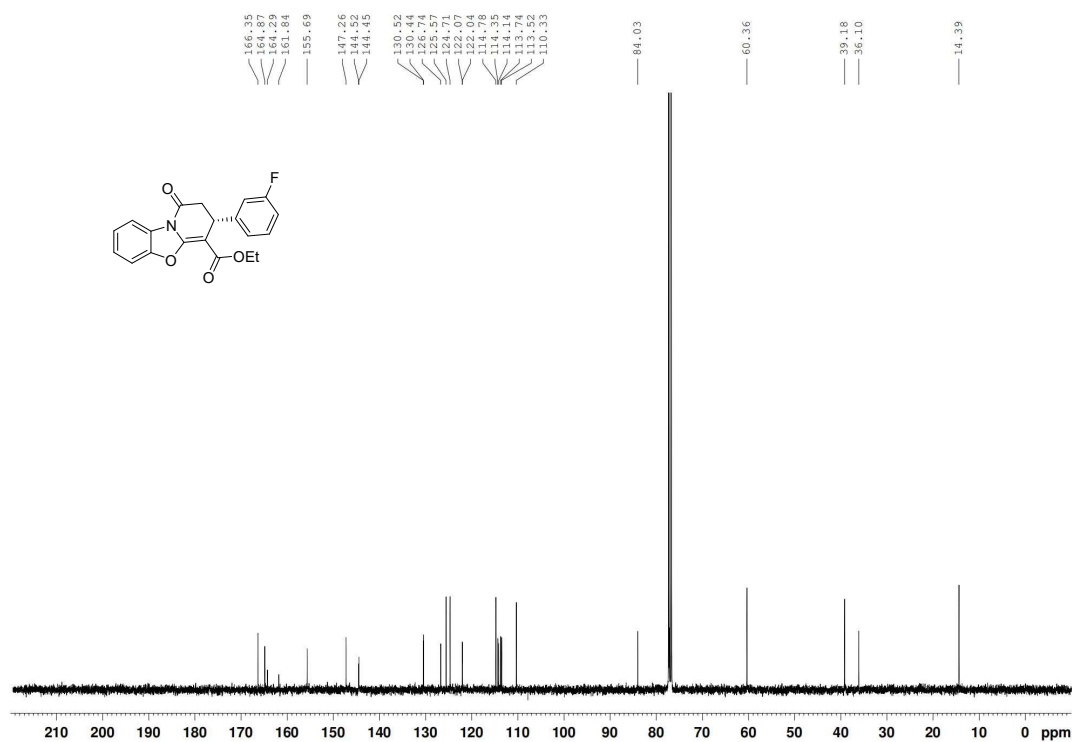



<sup>1</sup>H NMR spectrum of compound **3ak** (CDCl<sub>3</sub>, 400 MHz)

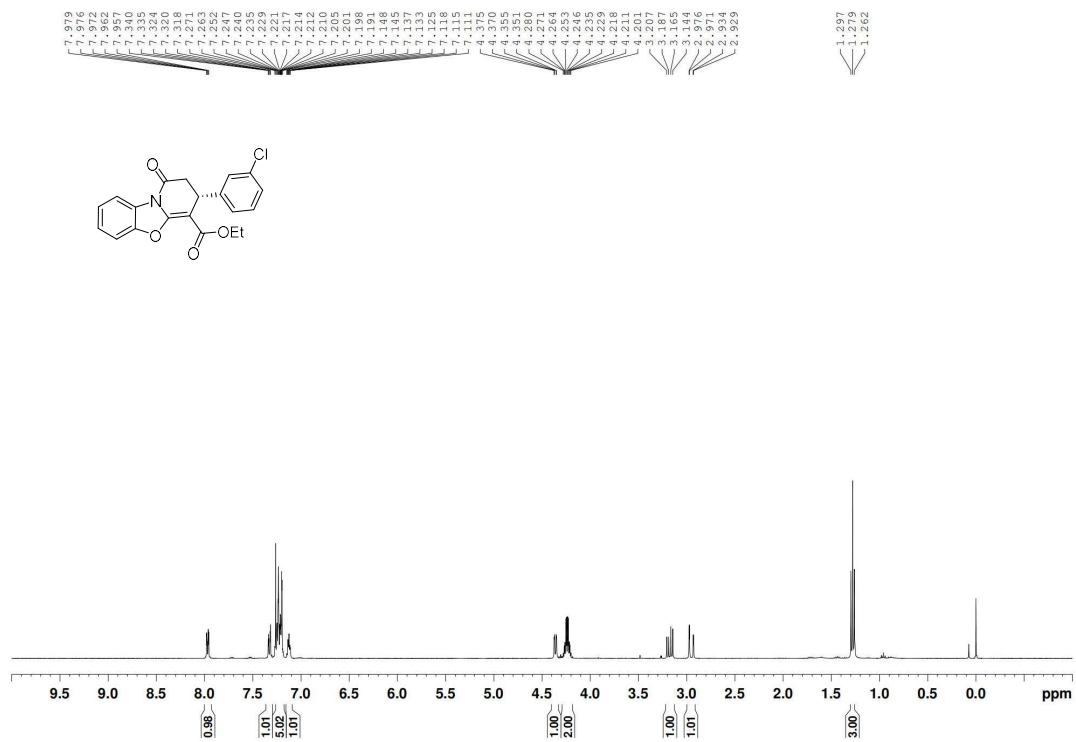

<sup>13</sup>C NMR spectrum of compound **3ak** (CDCl<sub>3</sub>, 100 MHz)

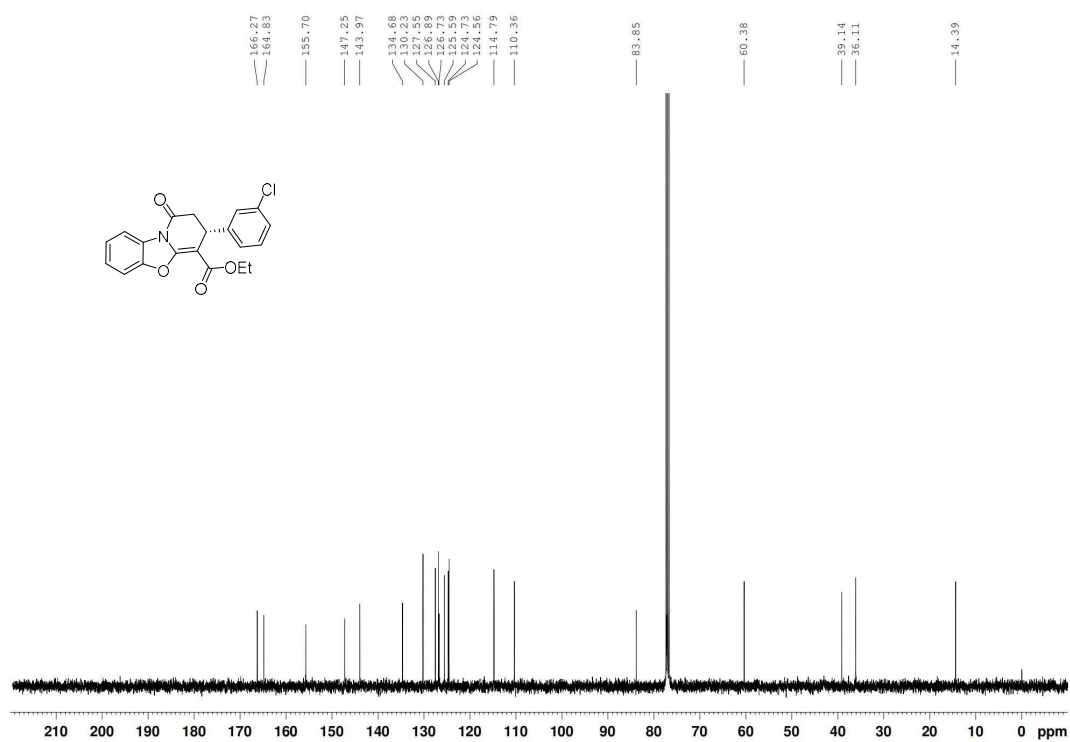

<sup>1</sup>H NMR spectrum of compound **3al** (CDCl<sub>3</sub>, 400 MHz)

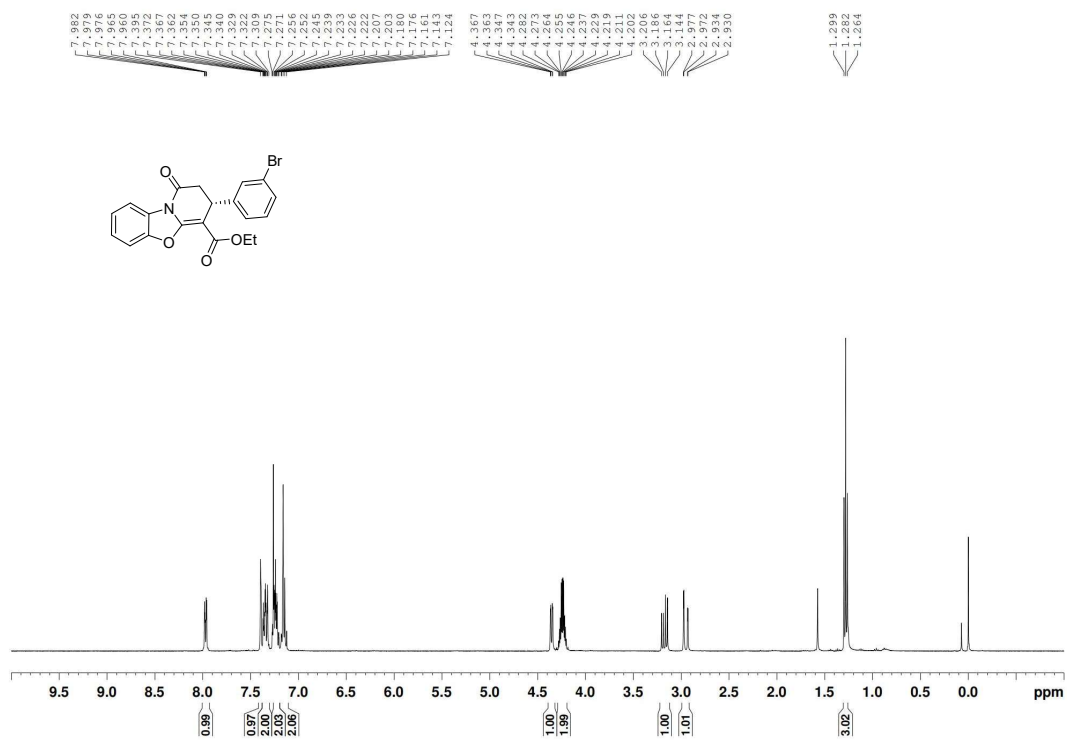

<sup>13</sup>C NMR spectrum of compound **3al** (CDCl<sub>3</sub>, 100 MHz)

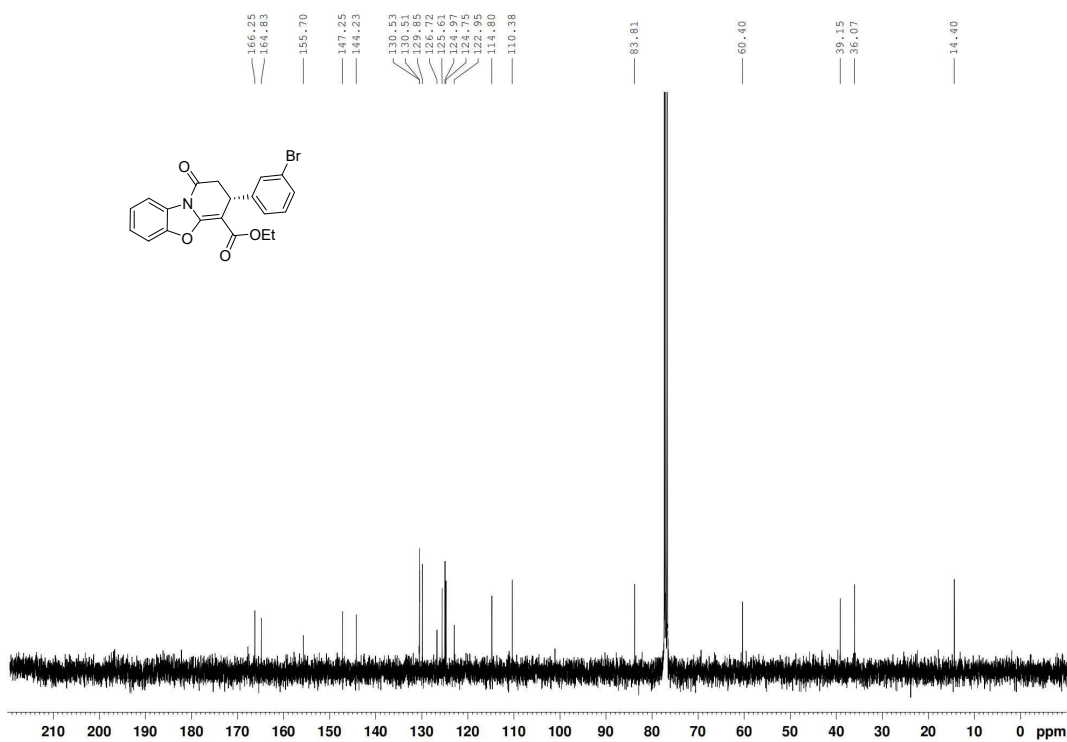

<sup>1</sup>H NMR spectrum of compound **3am** (CDCl<sub>3</sub>, 400 MHz)

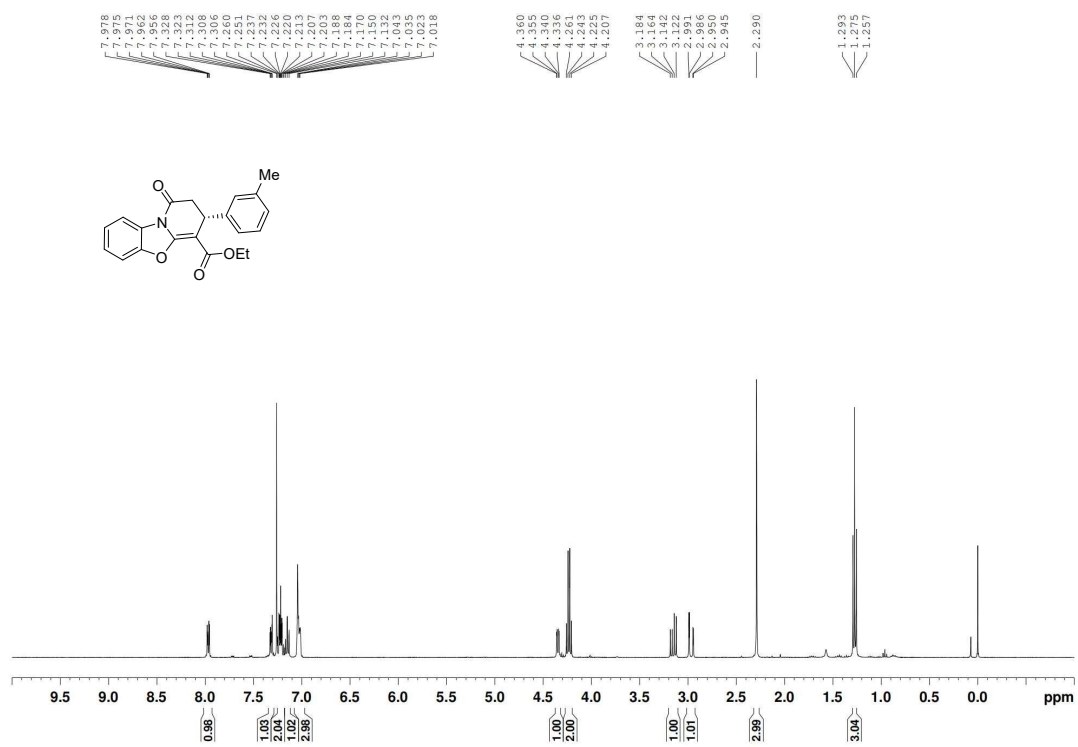

<sup>13</sup>C NMR spectrum of compound **3am** (CDCl<sub>3</sub>, 100 MHz)

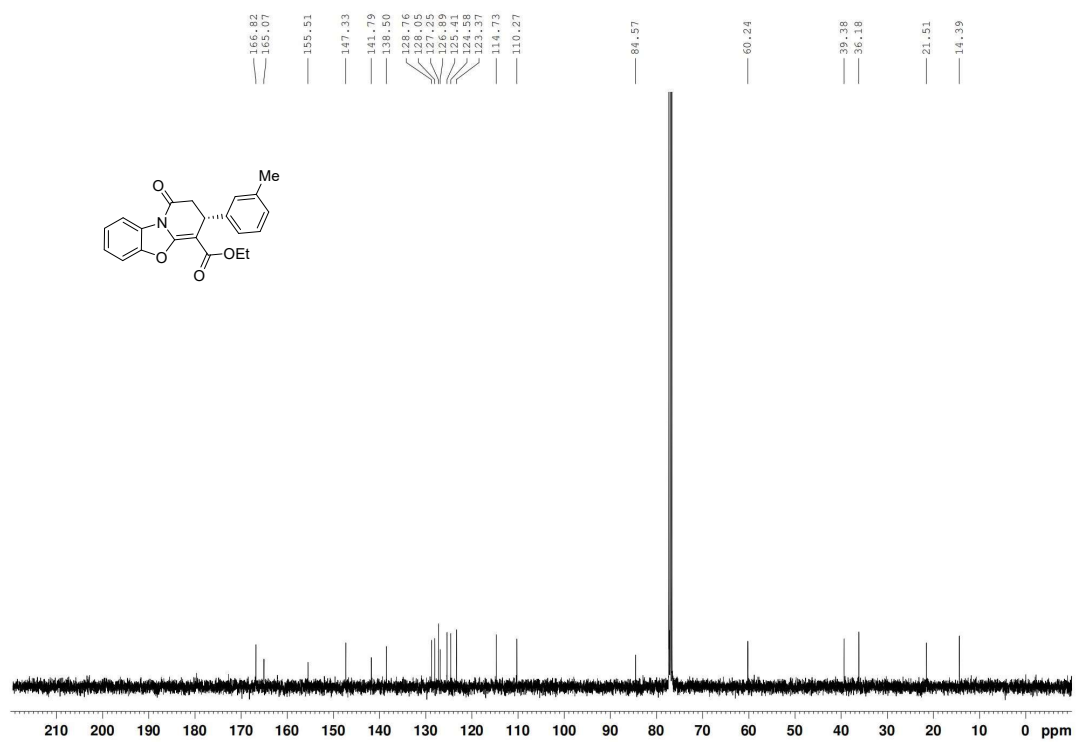

<sup>1</sup>H NMR spectrum of compound **3an** (CDCl<sub>3</sub>, 400 MHz)

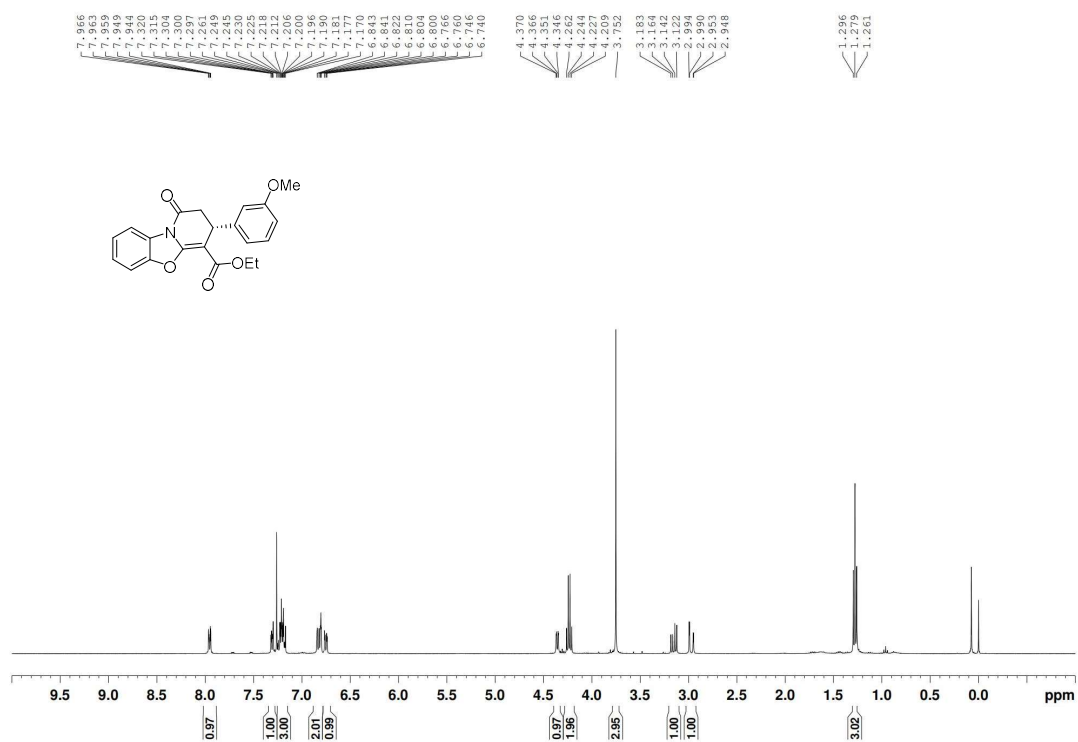

<sup>13</sup>C NMR spectrum of compound **3an** (CDCl<sub>3</sub>, 100 MHz)

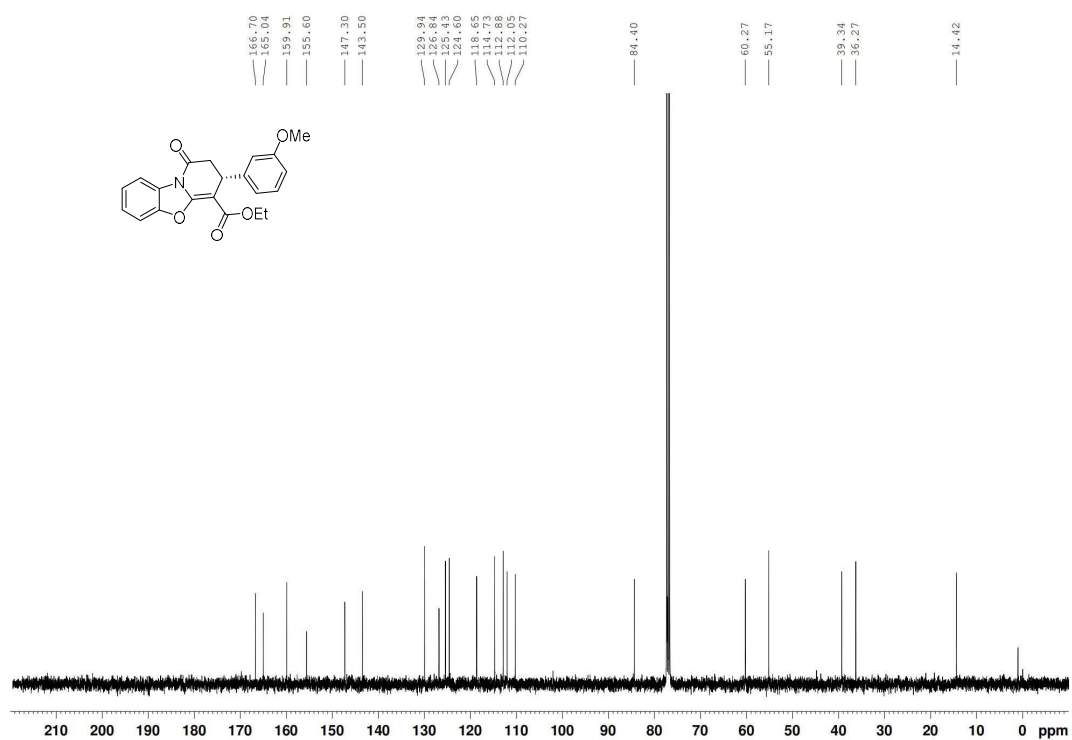

<sup>1</sup>H NMR spectrum of compound **3ao** (CDCl<sub>3</sub>, 400 MHz)

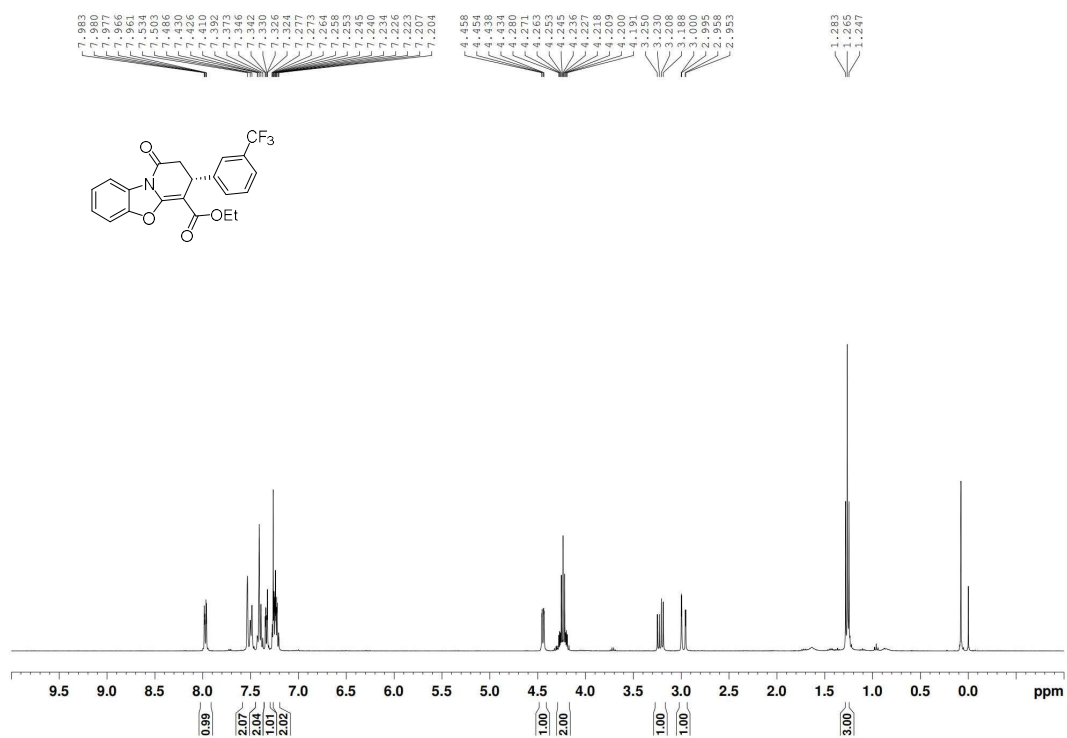

<sup>13</sup>C NMR spectrum of compound **3ao** (CDCl<sub>3</sub>, 100 MHz)

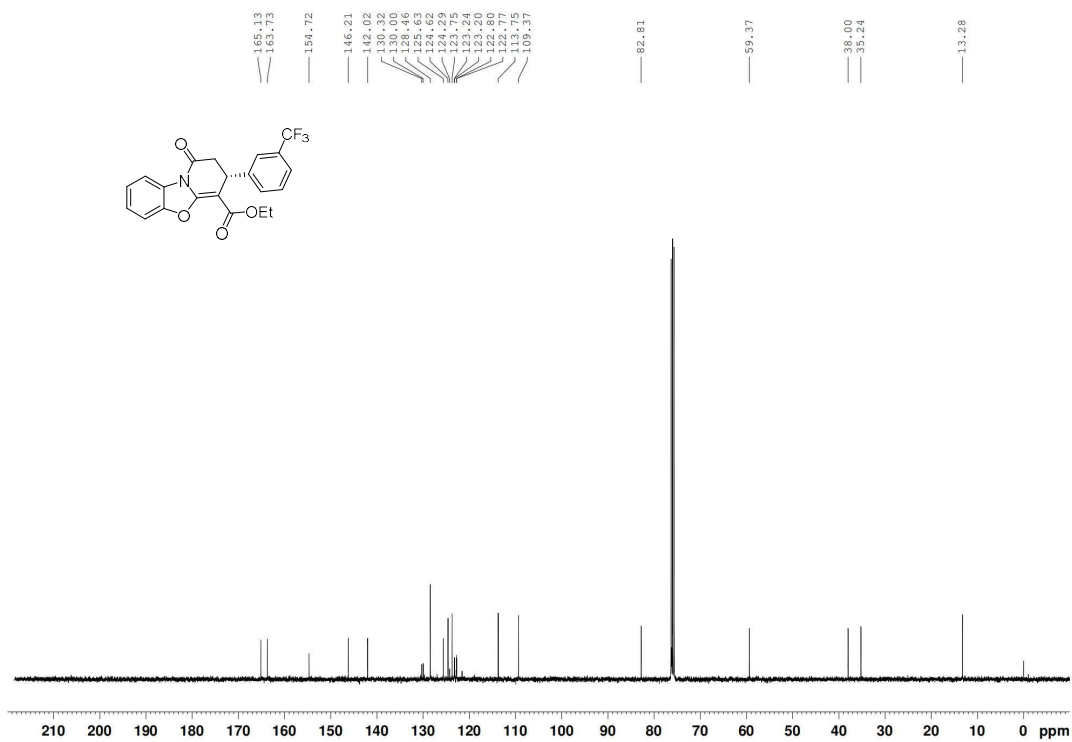

<sup>1</sup>H NMR spectrum of compound **3ap** (CDCl<sub>3</sub>, 400 MHz)

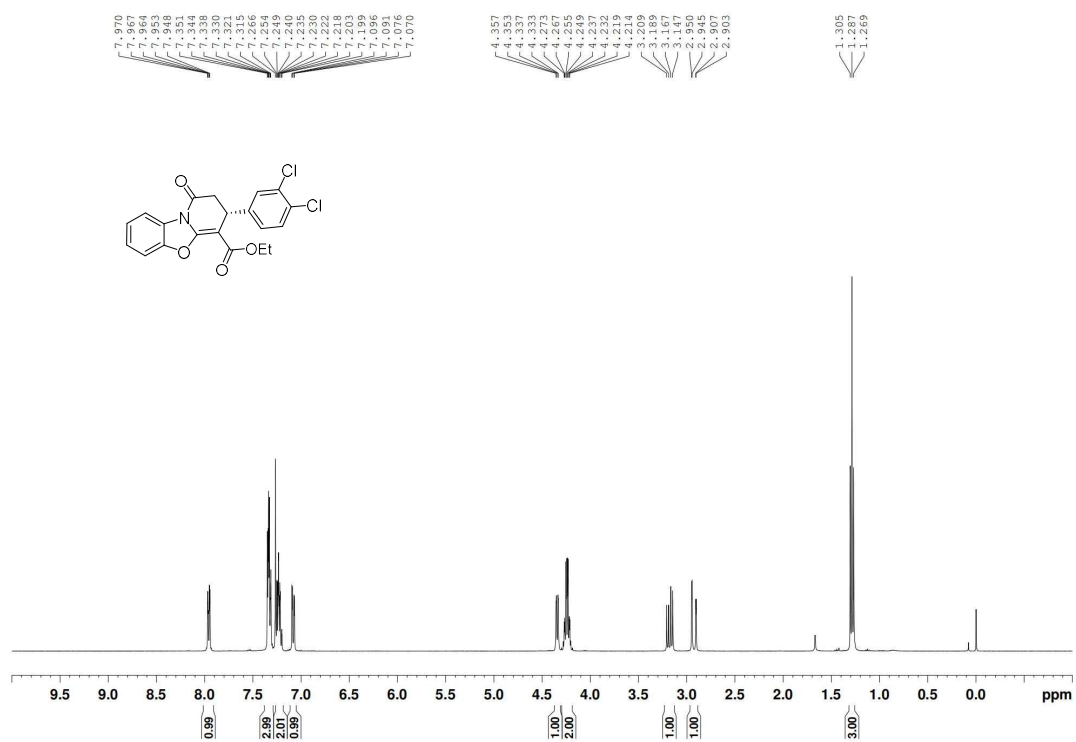

<sup>13</sup>C NMR spectrum of compound **3ap** (CDCl<sub>3</sub>, 100 MHz)

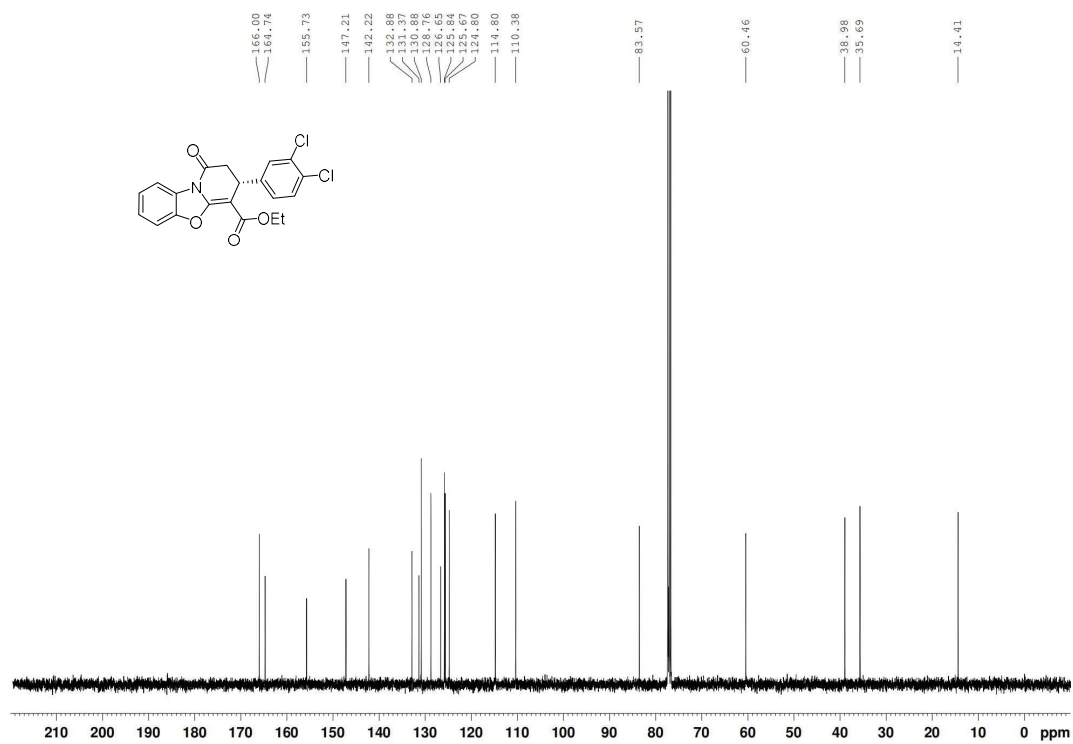



<sup>1</sup>H NMR spectrum of compound **3ar** (CDCl<sub>3</sub>, 400 MHz)

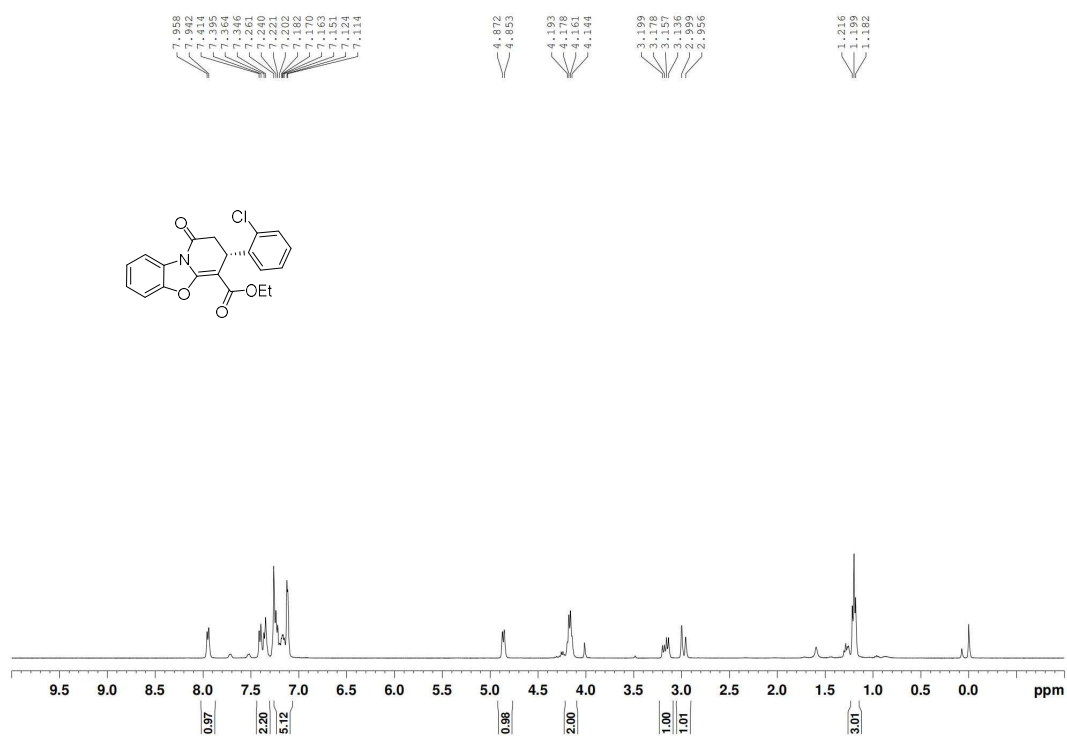

<sup>13</sup>C NMR spectrum of compound **3ar** (CDCl<sub>3</sub>, 100 MHz)

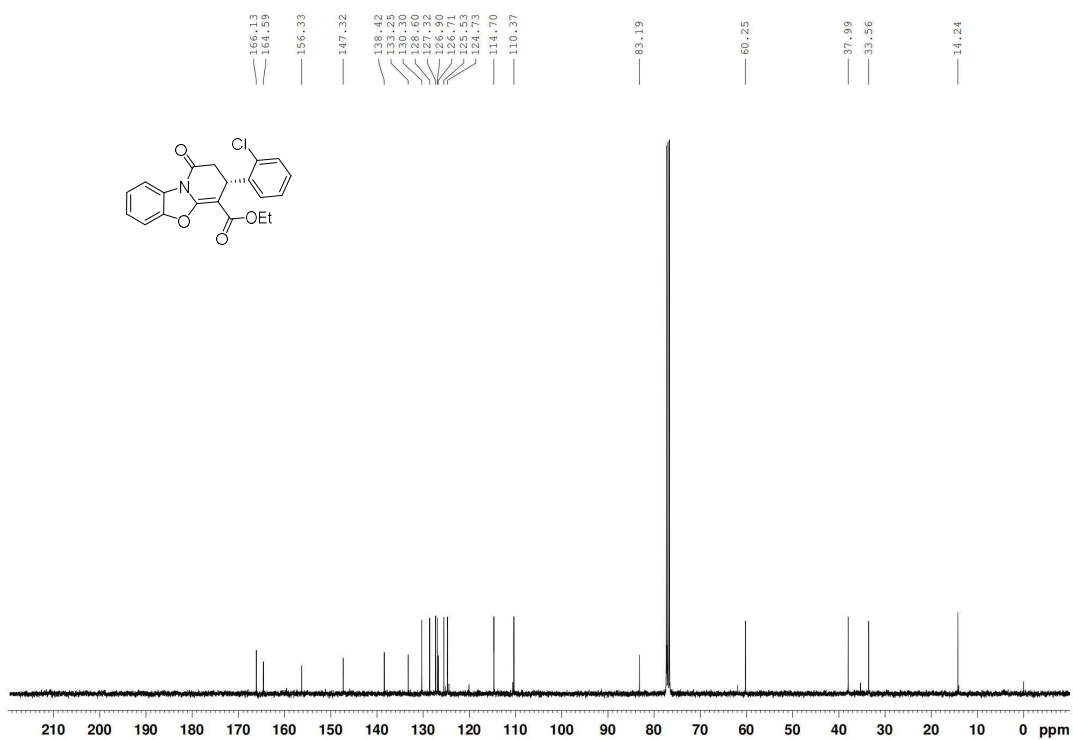



<sup>1</sup>H NMR spectrum of compound **3as** (CDCl<sub>3</sub>, 400 MHz)

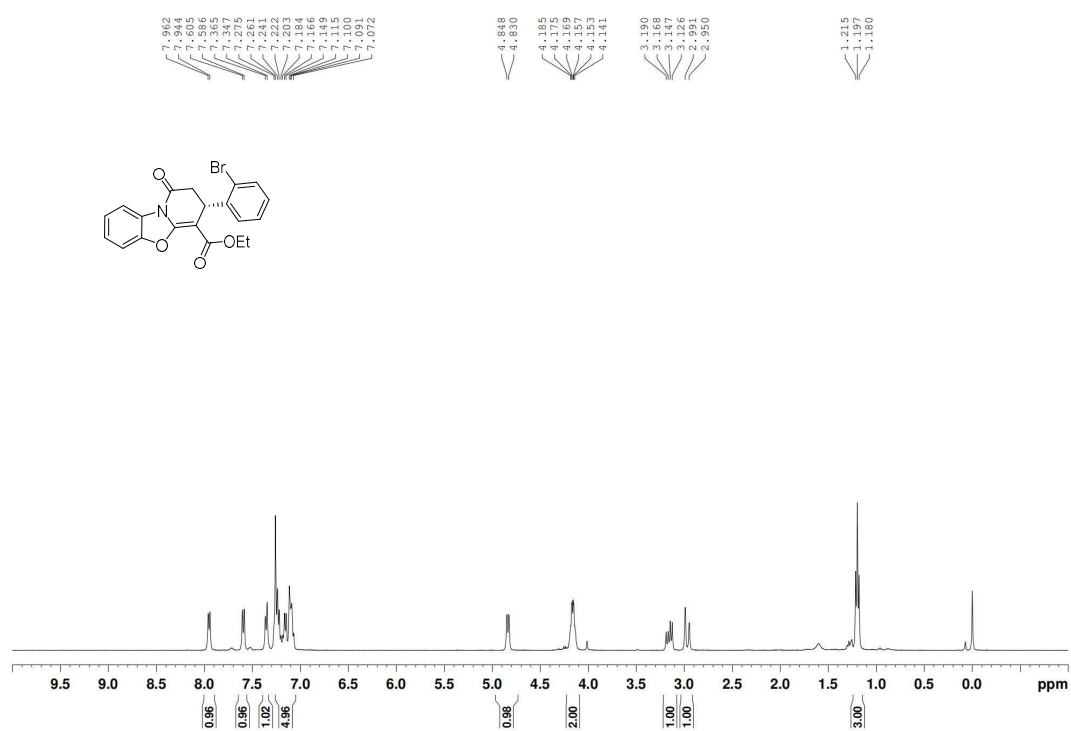

<sup>13</sup>C NMR spectrum of compound **3as** (CDCl<sub>3</sub>, 100 MHz)

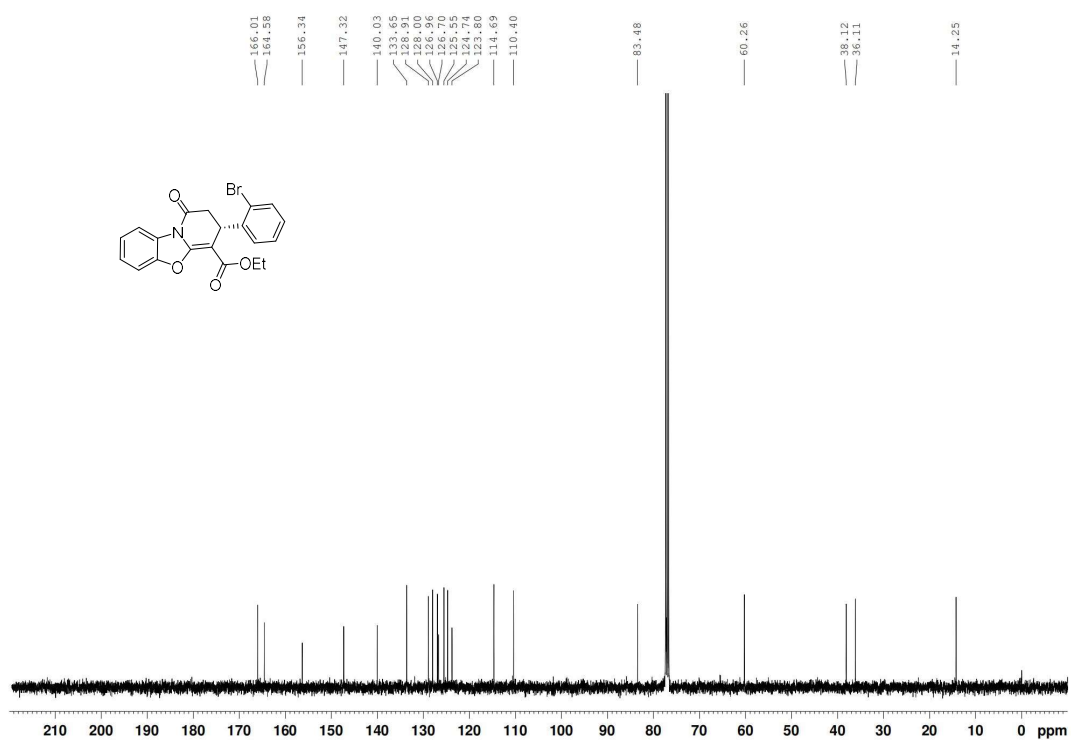

<sup>1</sup>H NMR spectrum of compound **3at** (CDCl<sub>3</sub>, 400 MHz)

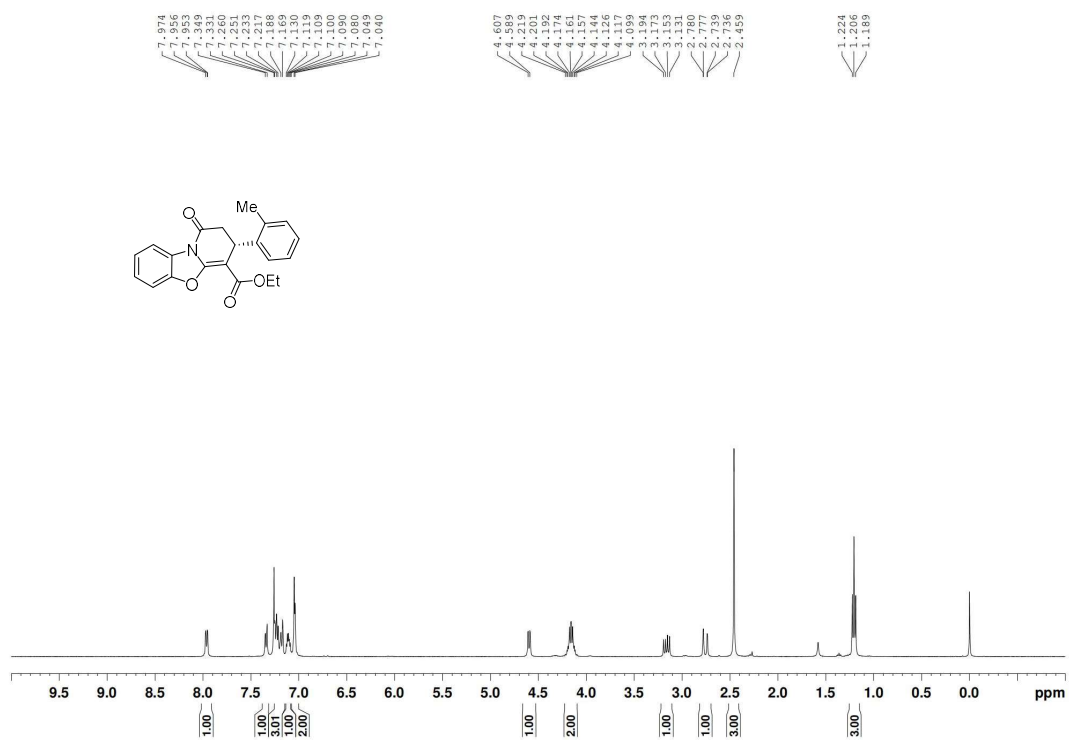

<sup>13</sup>C NMR spectrum of compound **3at** (CDCl<sub>3</sub>, 100 MHz)

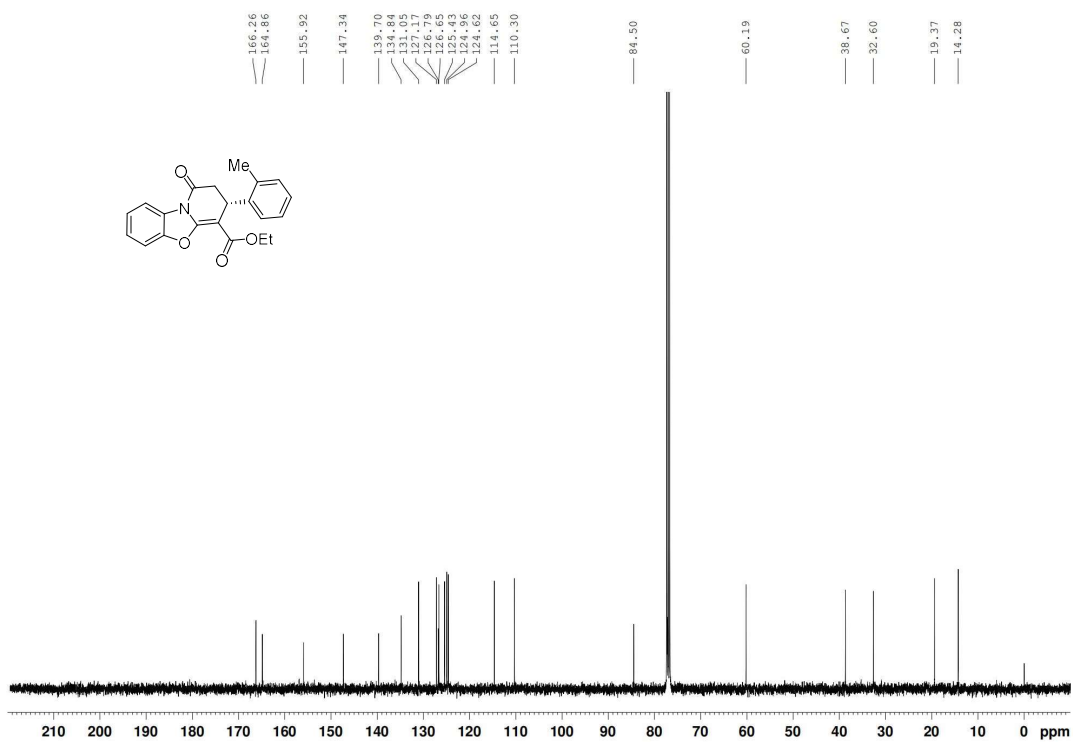

<sup>1</sup>H NMR spectrum of compound **3au** (CDCl<sub>3</sub>, 400 MHz)

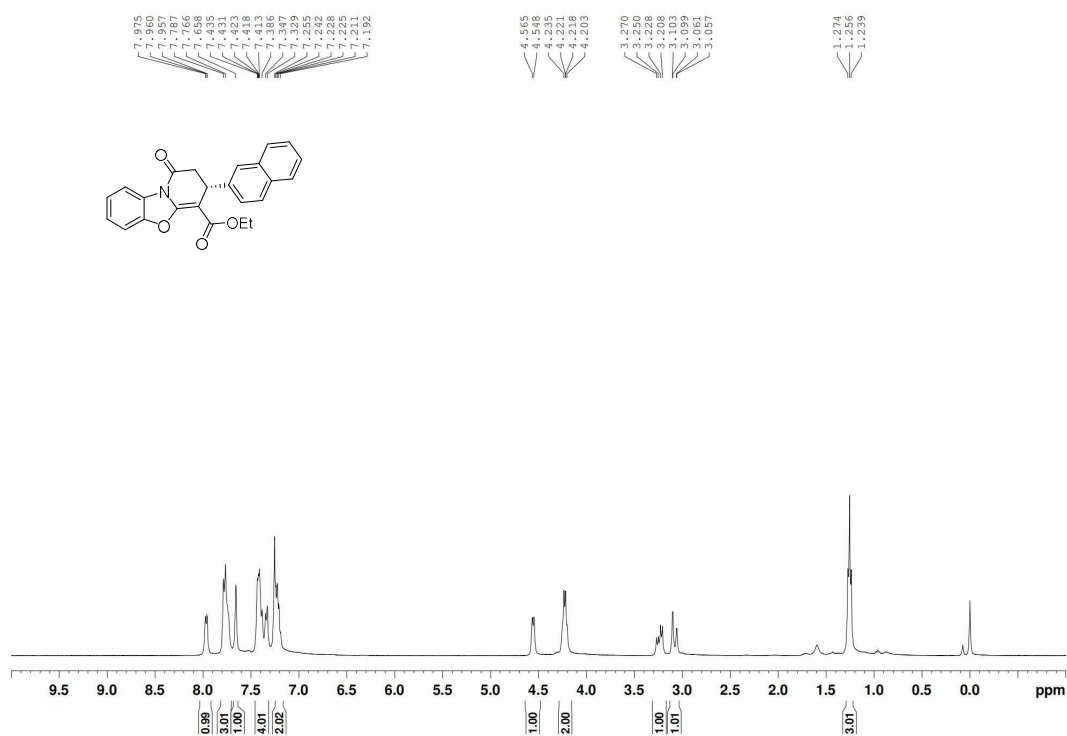

<sup>13</sup>C NMR spectrum of compound **3au** (CDCl<sub>3</sub>, 100 MHz)

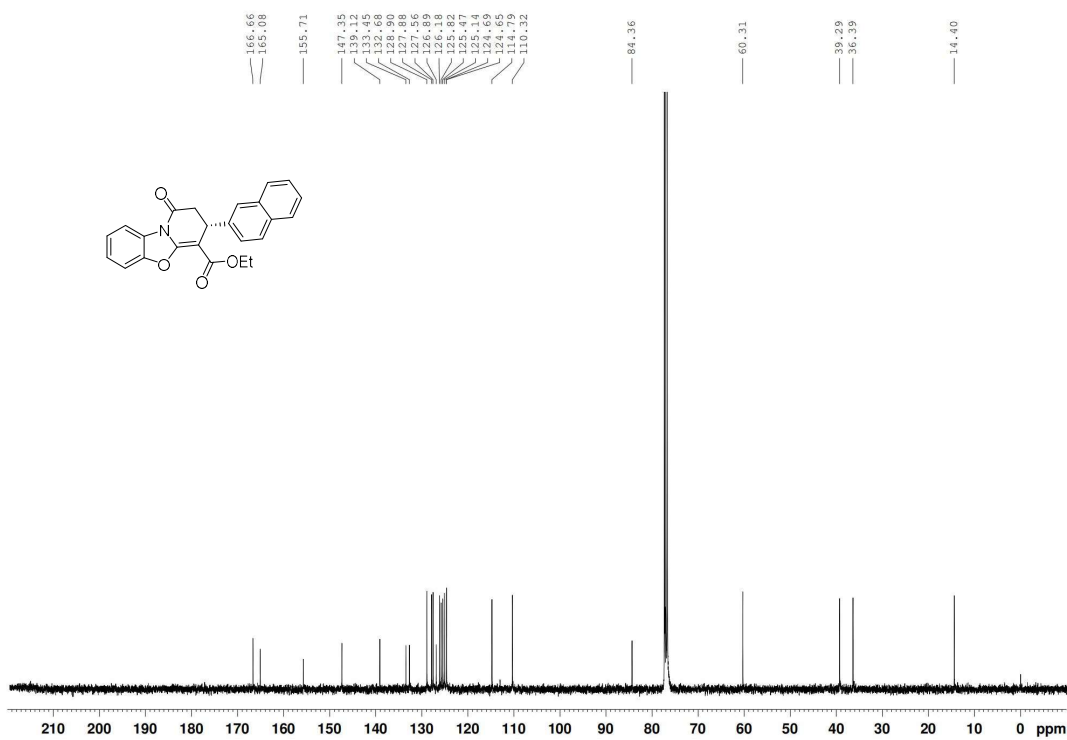

<sup>1</sup>H NMR spectrum of compound **3av** (CDCl<sub>3</sub>, 400 MHz)

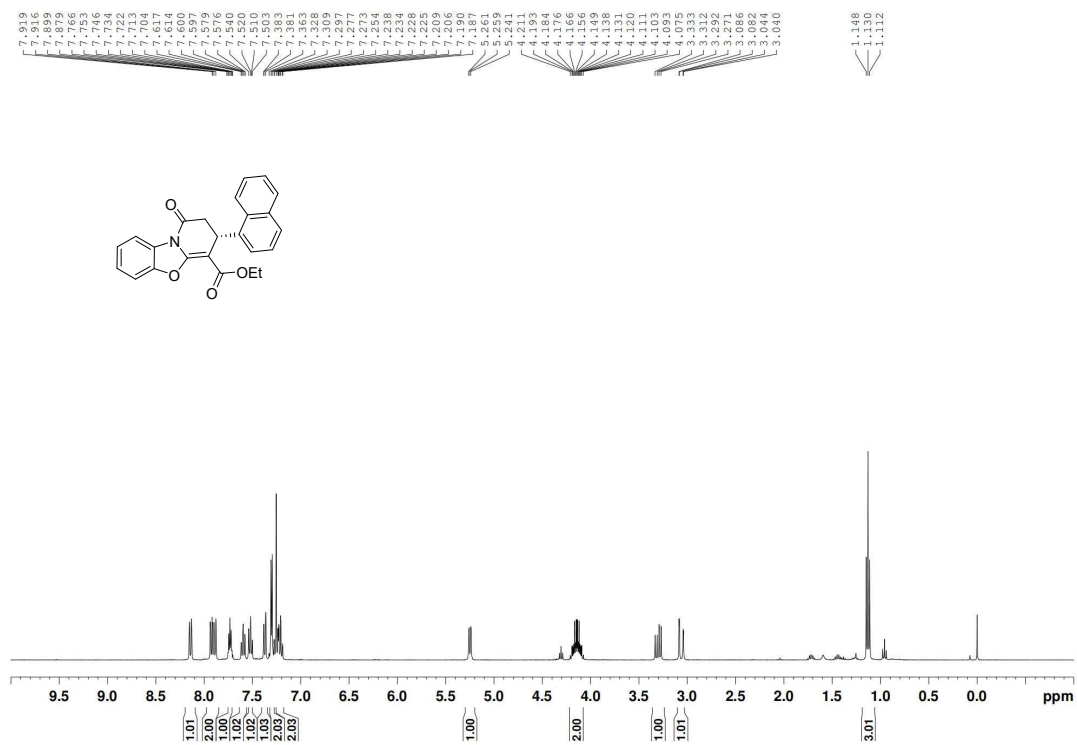

<sup>13</sup>C NMR spectrum of compound **3av** (CDCl<sub>3</sub>, 100 MHz)

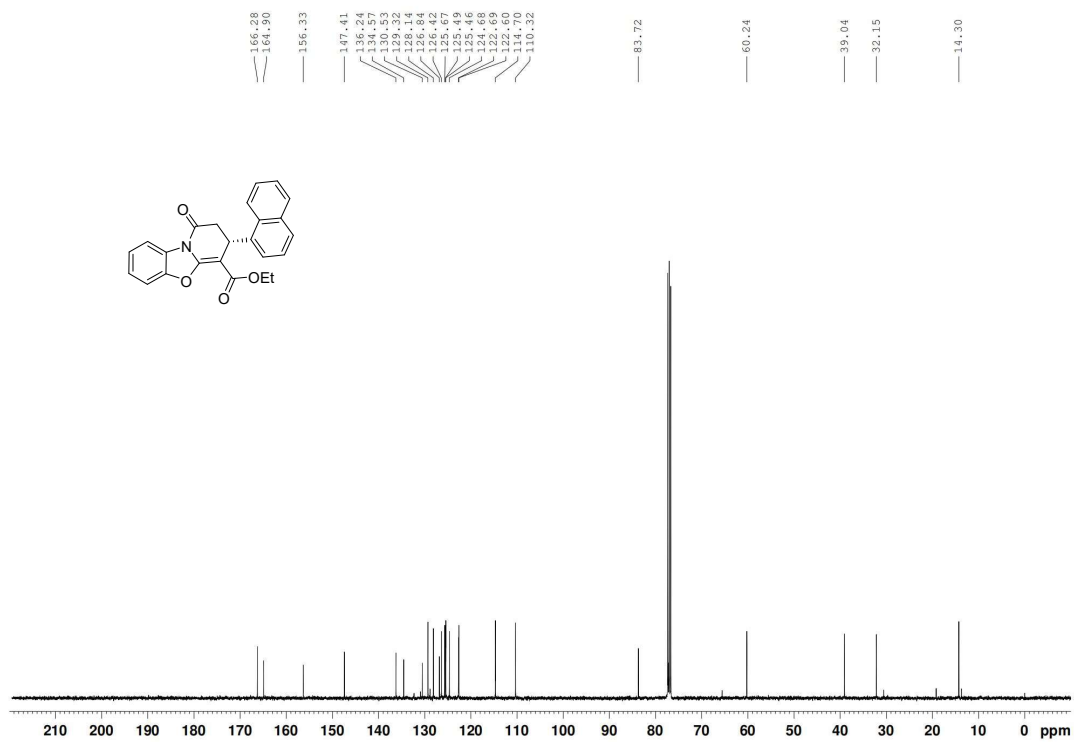

<sup>1</sup>H NMR spectrum of compound **3aw** (CDCl<sub>3</sub>, 400 MHz)

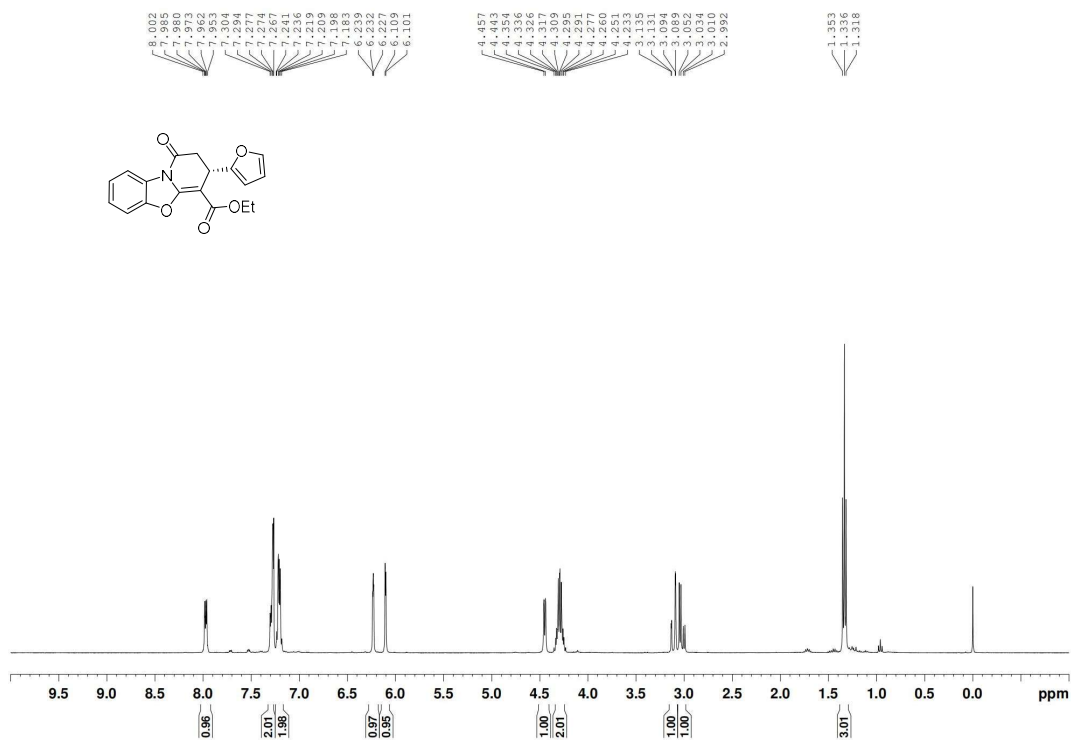

<sup>13</sup>C NMR spectrum of compound **3aw** (CDCl<sub>3</sub>, 100 MHz)

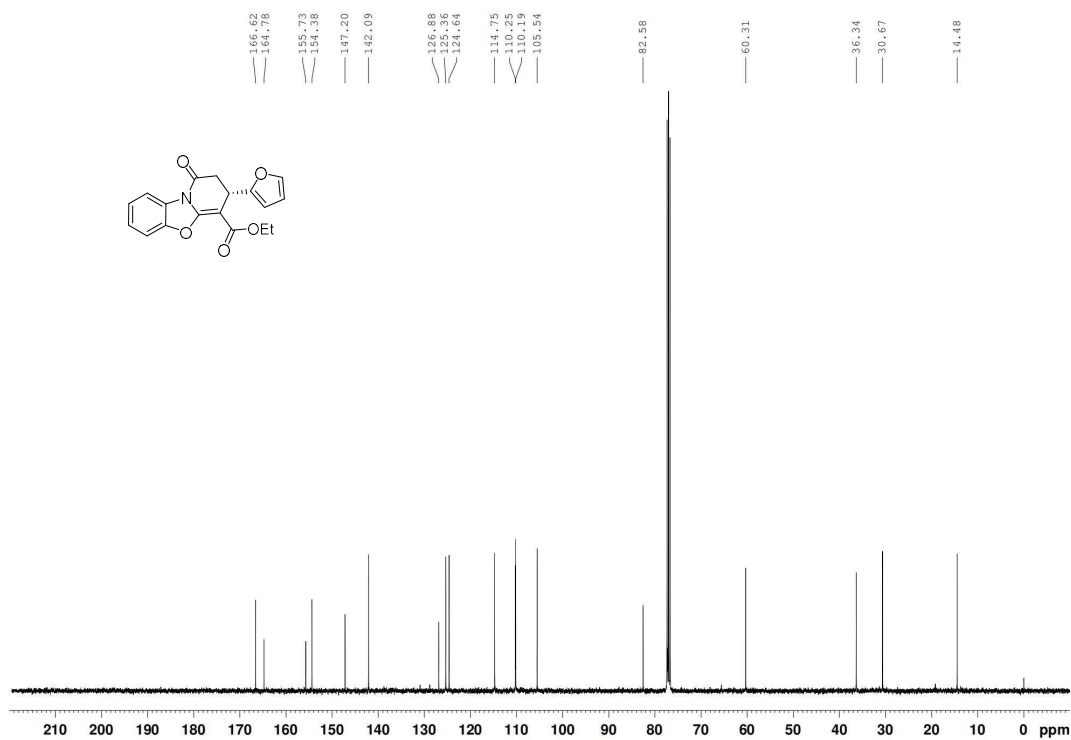

<sup>1</sup>H NMR spectrum of compound **3ax** (CDCl<sub>3</sub>, 400 MHz)

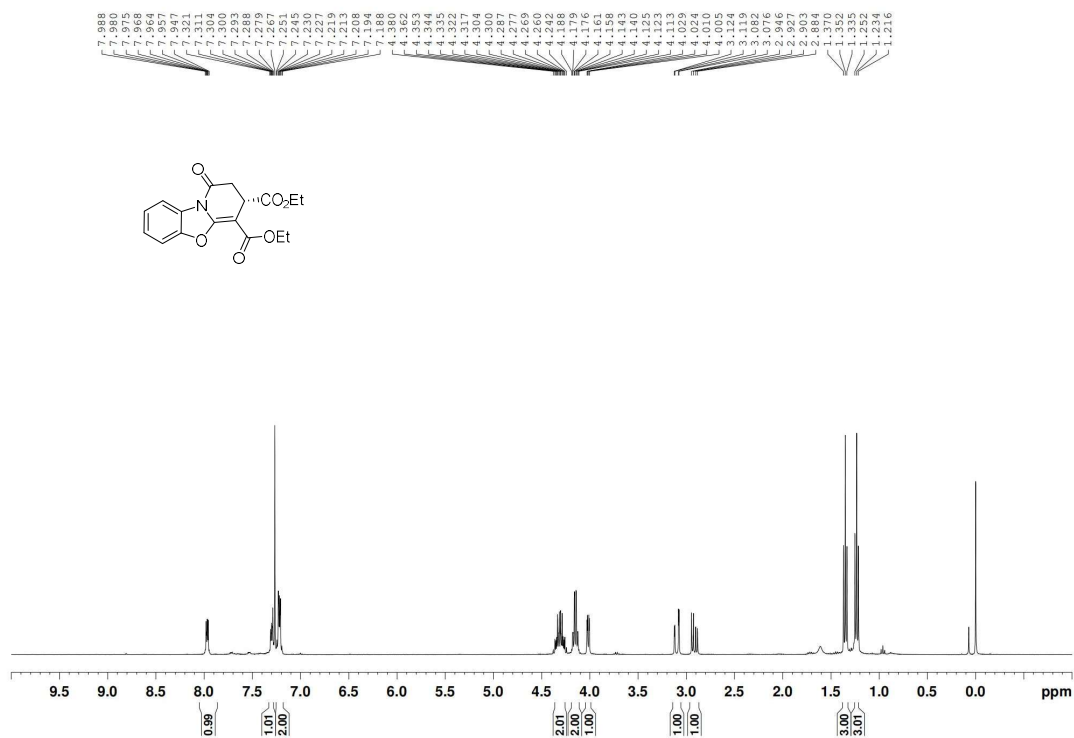

<sup>13</sup>C NMR spectrum of compound **3ax** (CDCl<sub>3</sub>, 100 MHz)

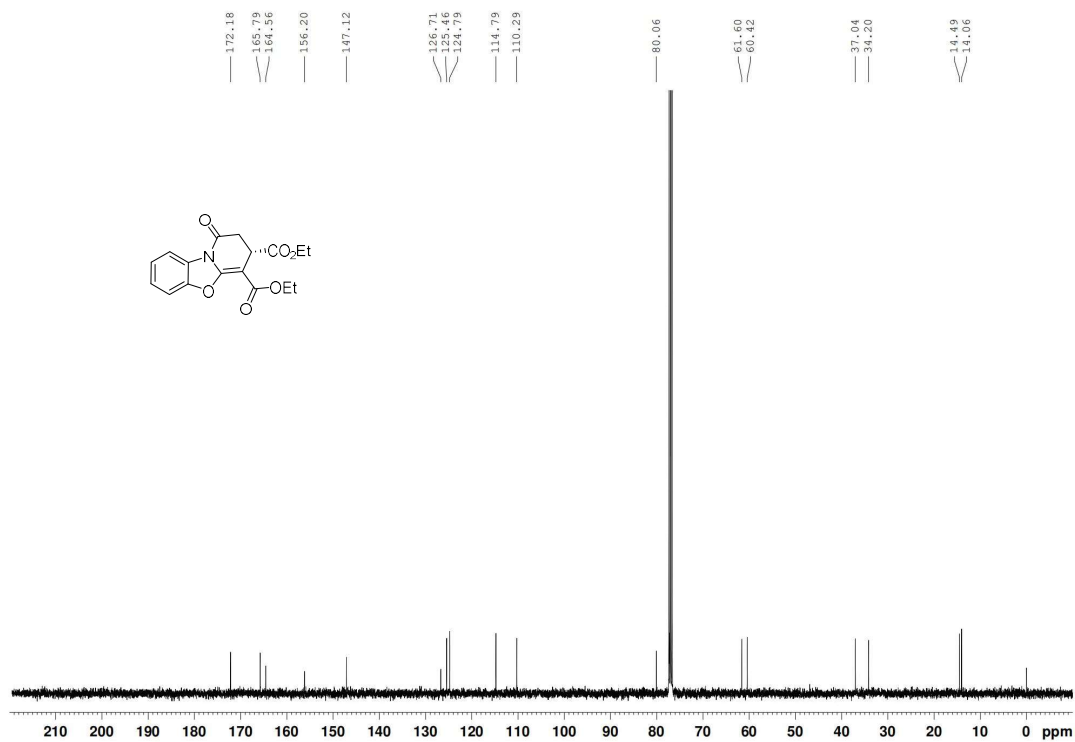

<sup>1</sup>H NMR spectrum of compound **3ay** (CDCl<sub>3</sub>, 400 MHz)

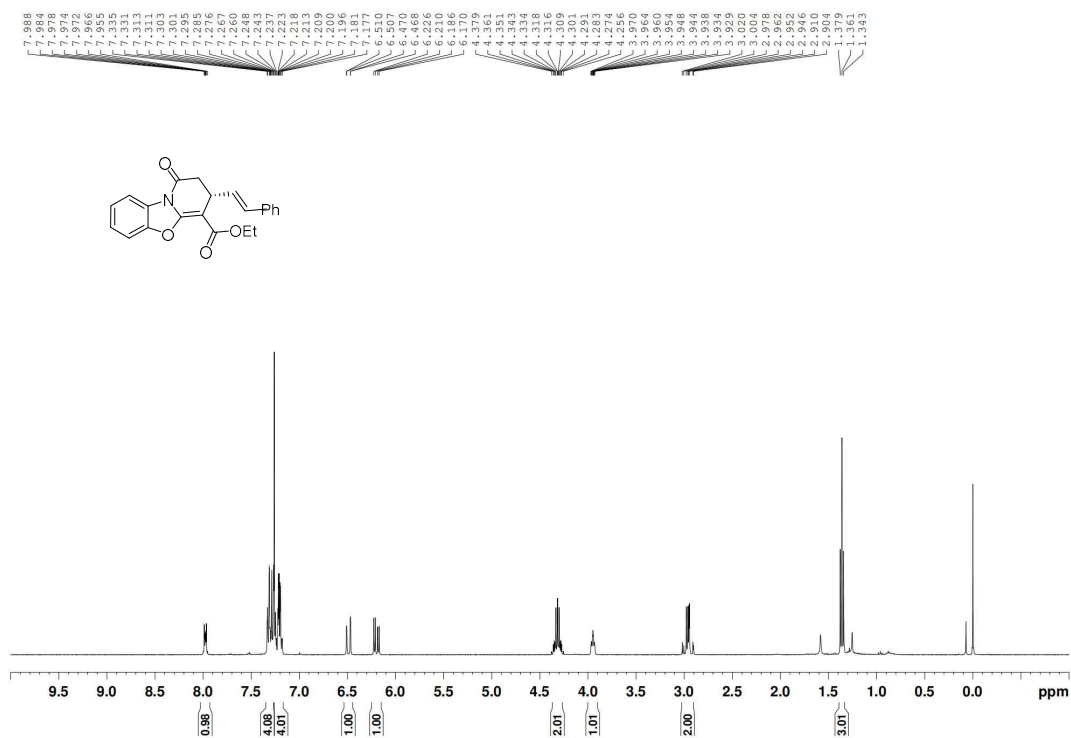

<sup>13</sup>C NMR spectrum of compound **3ay** (CDCl<sub>3</sub>, 100 MHz)

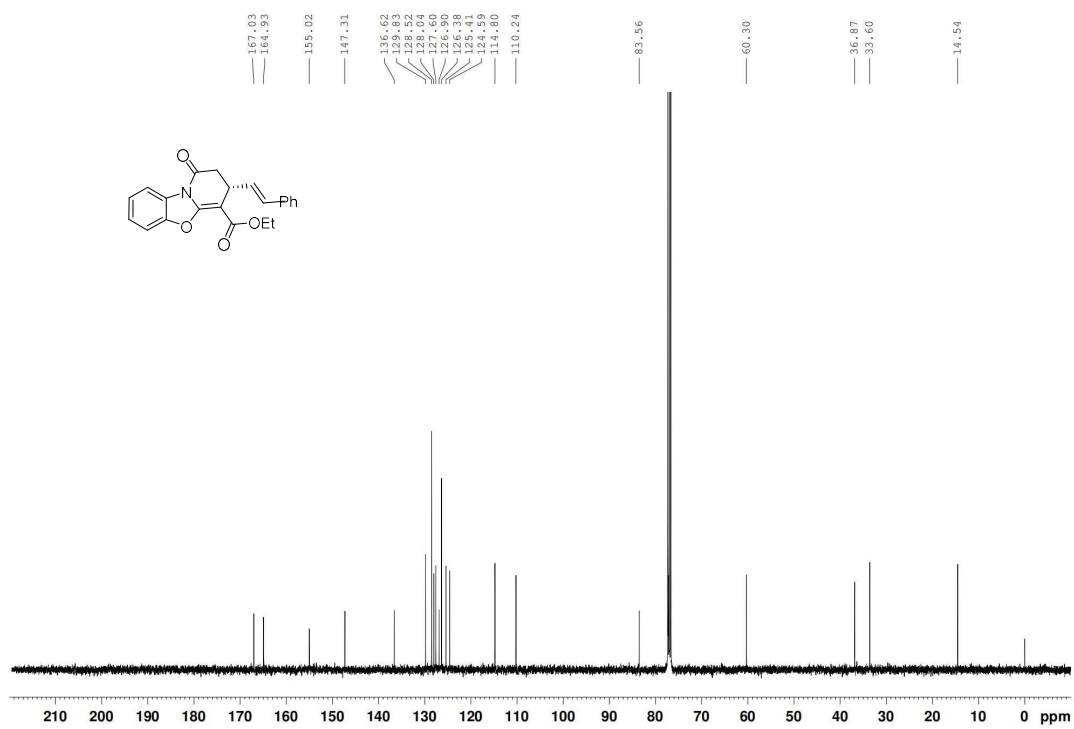

<sup>1</sup>H NMR spectrum of compound **3az** (CDCl<sub>3</sub>, 400 MHz)

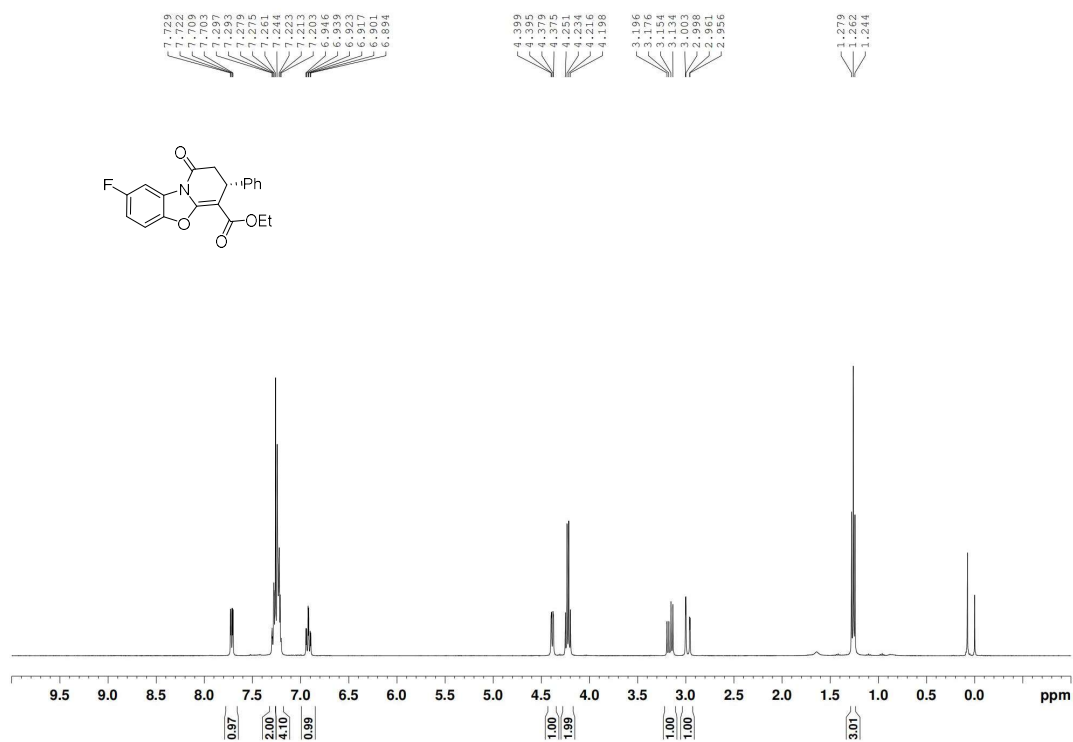

<sup>13</sup>C NMR spectrum of compound **3az** (CDCl<sub>3</sub>, 100 MHz)

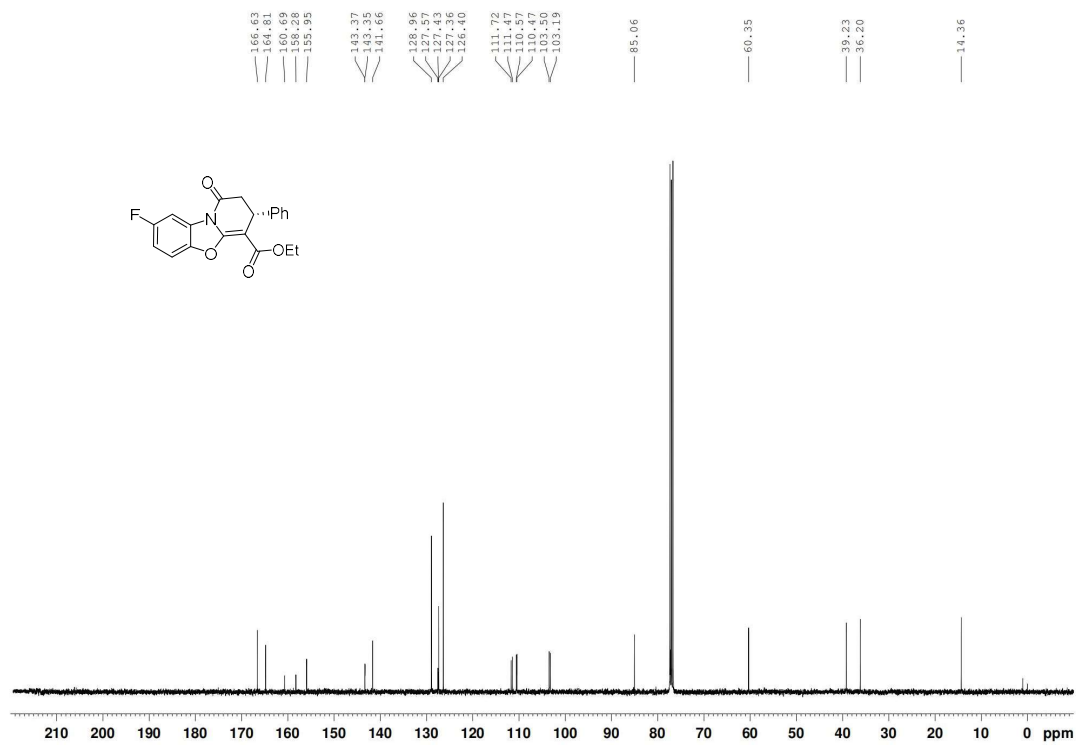



<sup>1</sup>H NMR spectrum of compound **3ba** (CDCl<sub>3</sub>, 400 MHz)

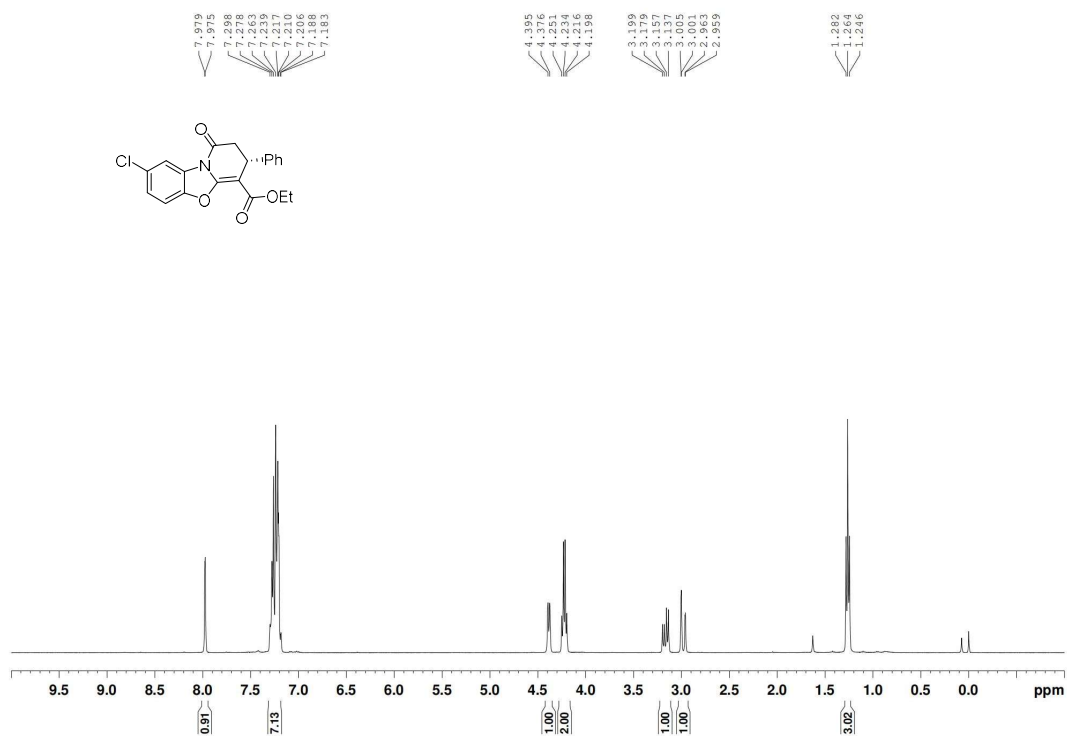

<sup>13</sup>C NMR spectrum of compound **3ba** (CDCl<sub>3</sub>, 100 MHz)

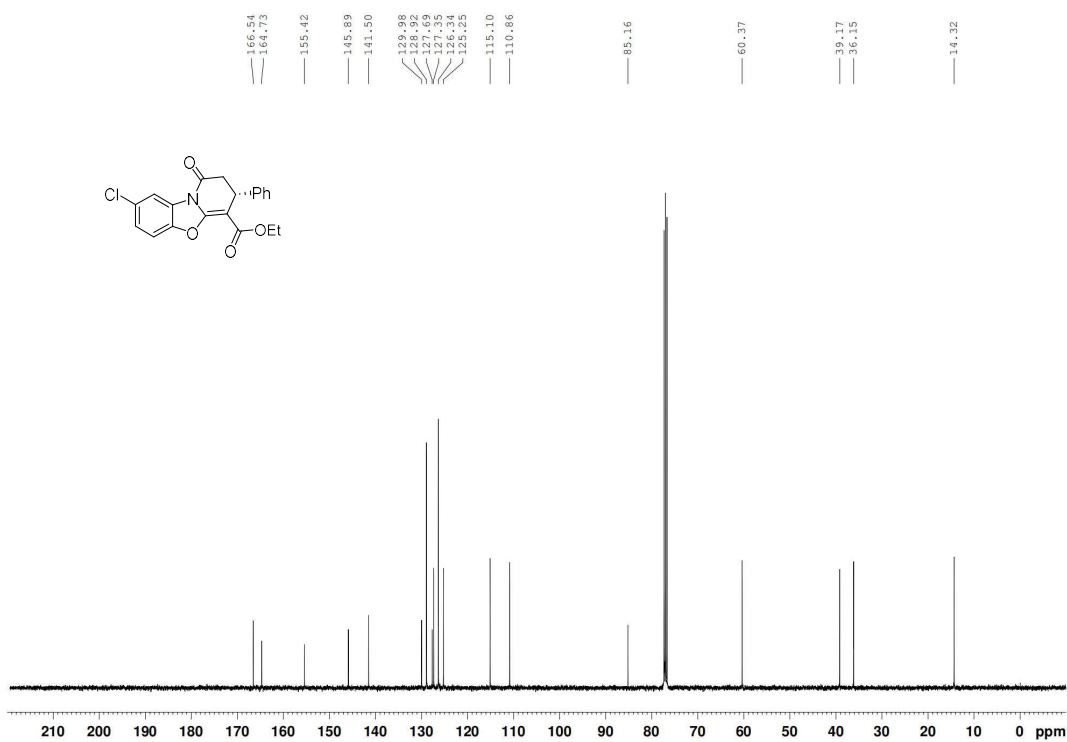

<sup>1</sup>H NMR spectrum of compound **3bb** (CDCl<sub>3</sub>, 400 MHz)

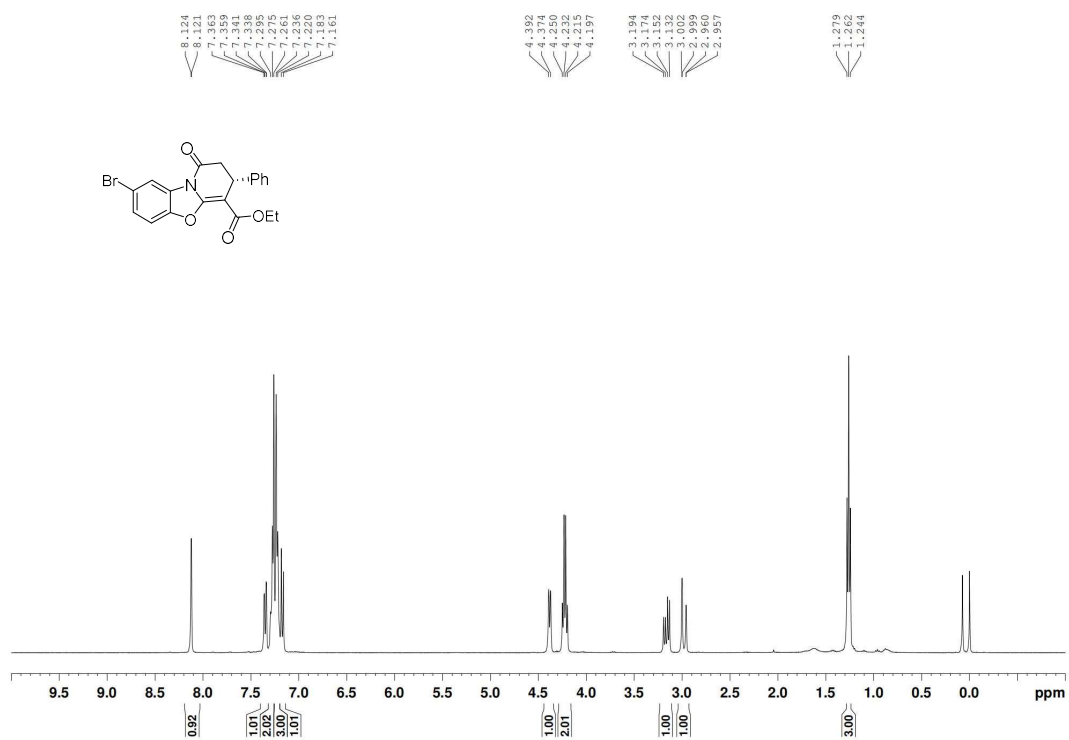

<sup>13</sup>C NMR spectrum of compound **3bb** (CDCl<sub>3</sub>, 100 MHz)

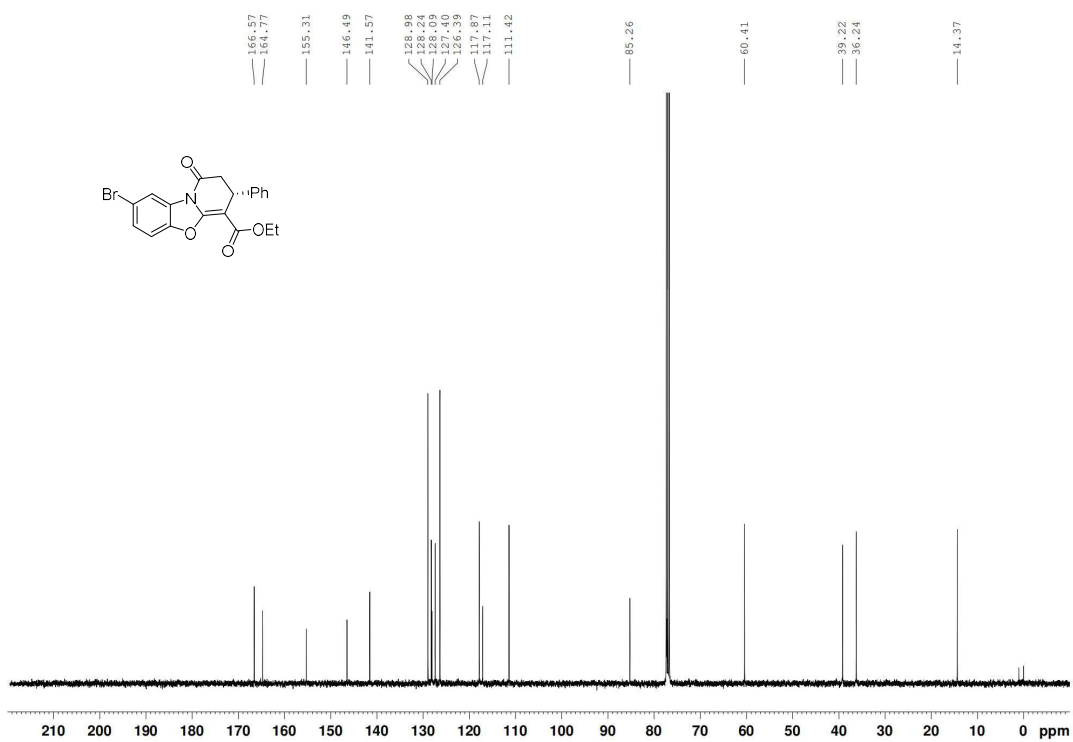

<sup>1</sup>H NMR spectrum of compound **3bc** (CDCl<sub>3</sub>, 400 MHz)

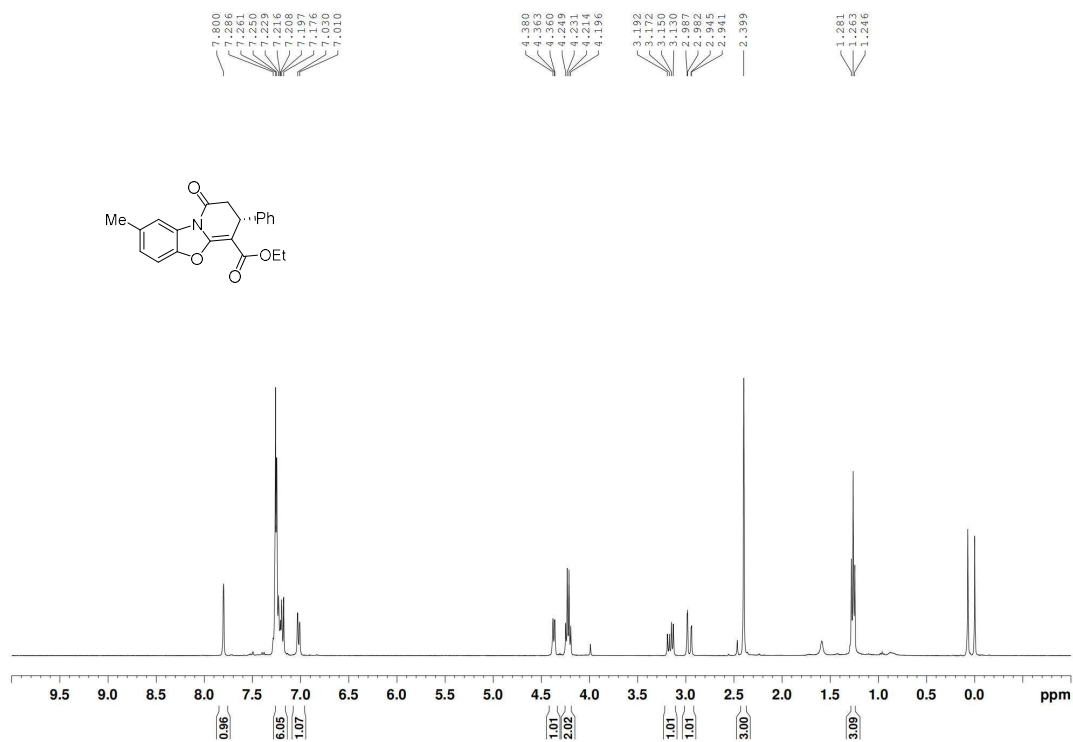

<sup>13</sup>C NMR spectrum of compound **3bc** (CDCl<sub>3</sub>, 100 MHz)

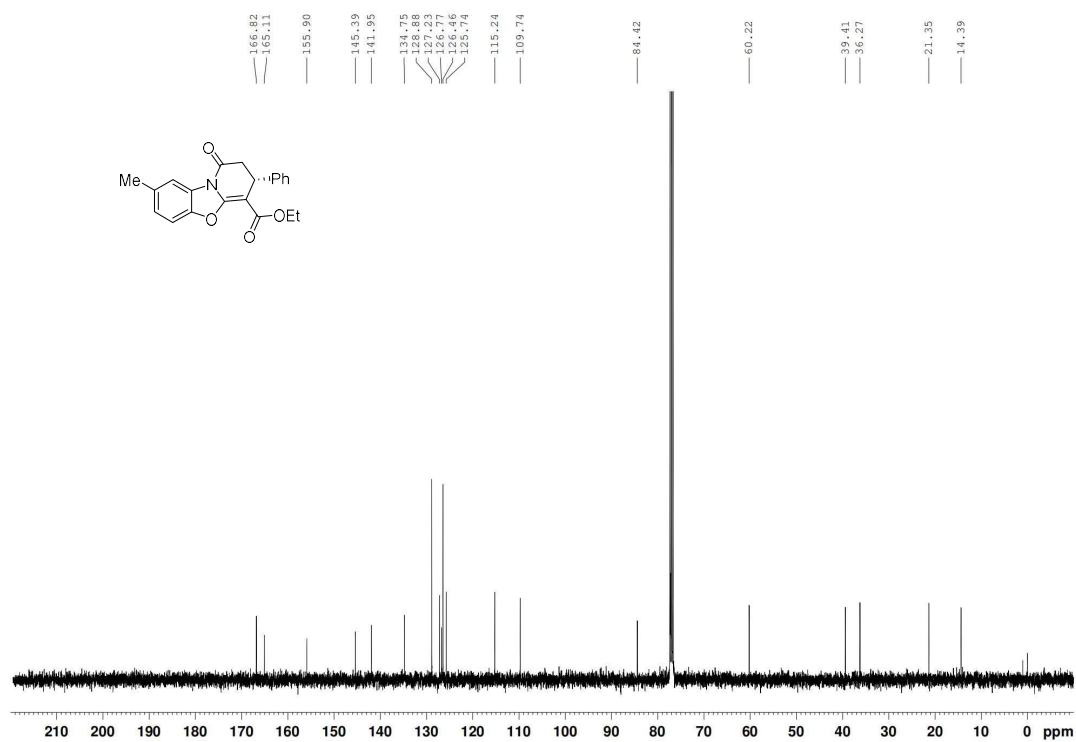

<sup>1</sup>H NMR spectrum of compound **3bd** (CDCl<sub>3</sub>, 400 MHz)

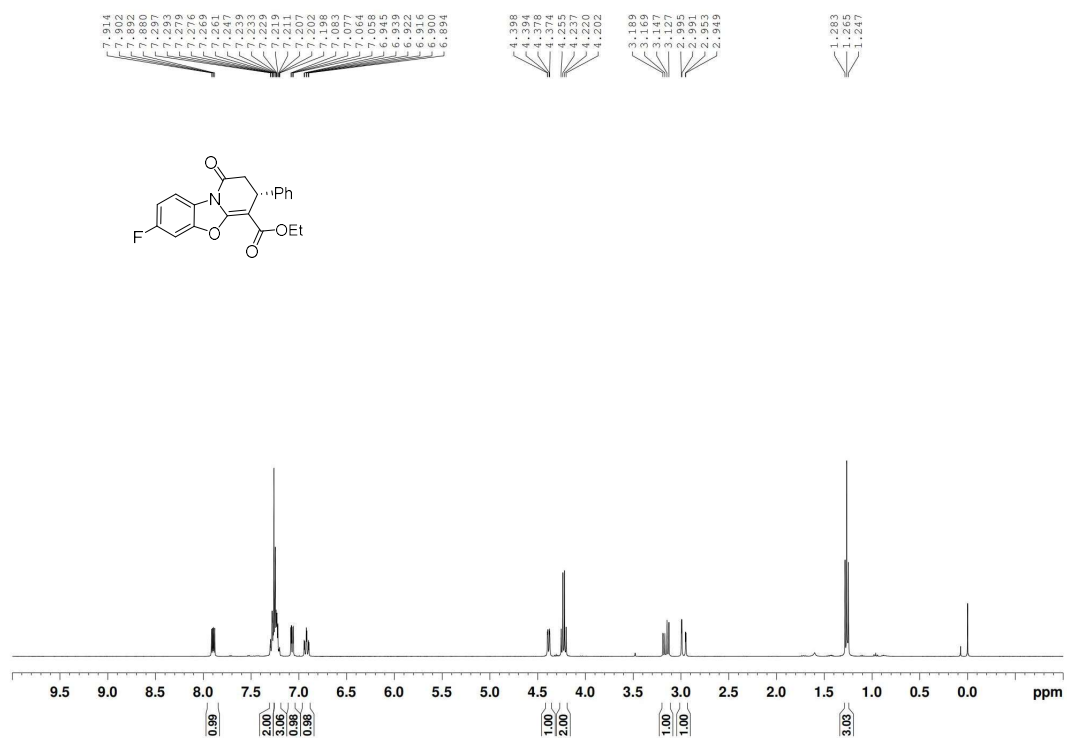

<sup>13</sup>C NMR spectrum of compound **3bd** (CDCl<sub>3</sub>, 100 MHz)

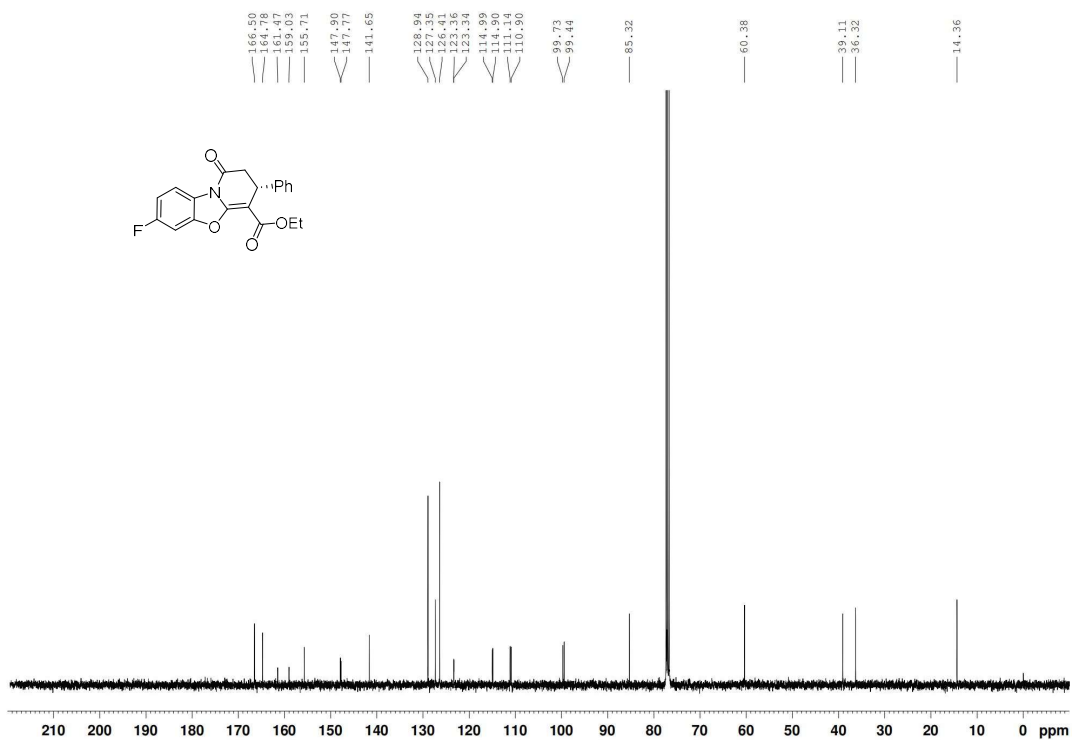

<sup>1</sup>H NMR spectrum of compound **3be** (CDCl<sub>3</sub>, 400 MHz)

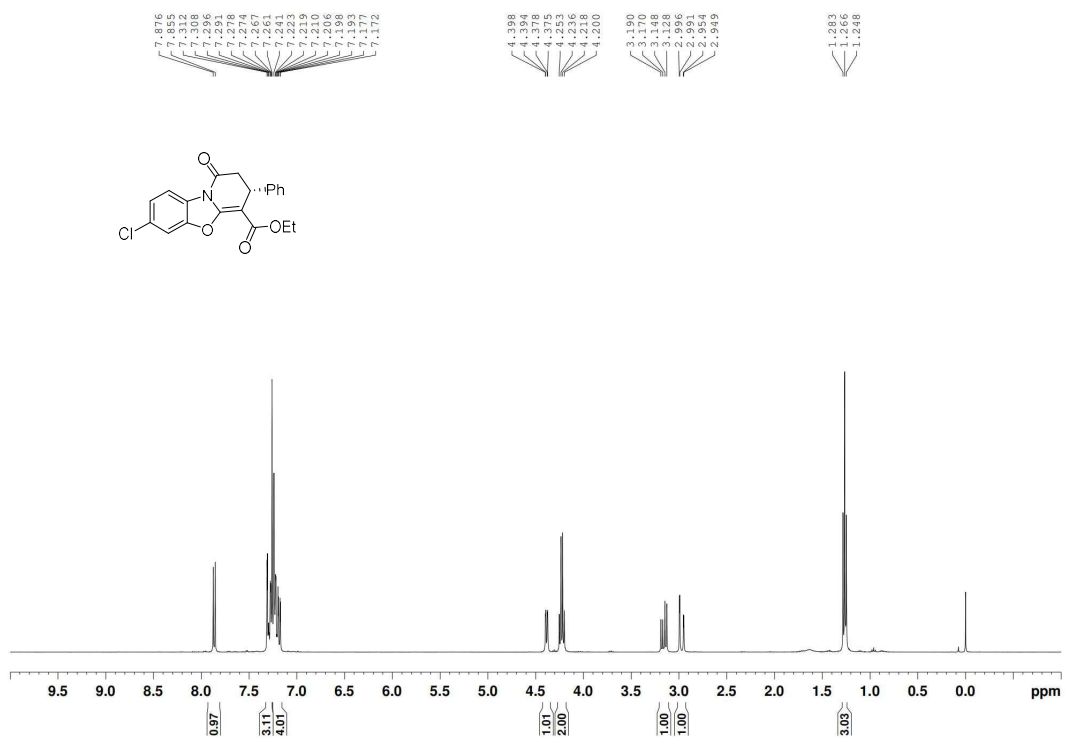

<sup>13</sup>C NMR spectrum of compound **3be** (CDCl<sub>3</sub>, 100 MHz)

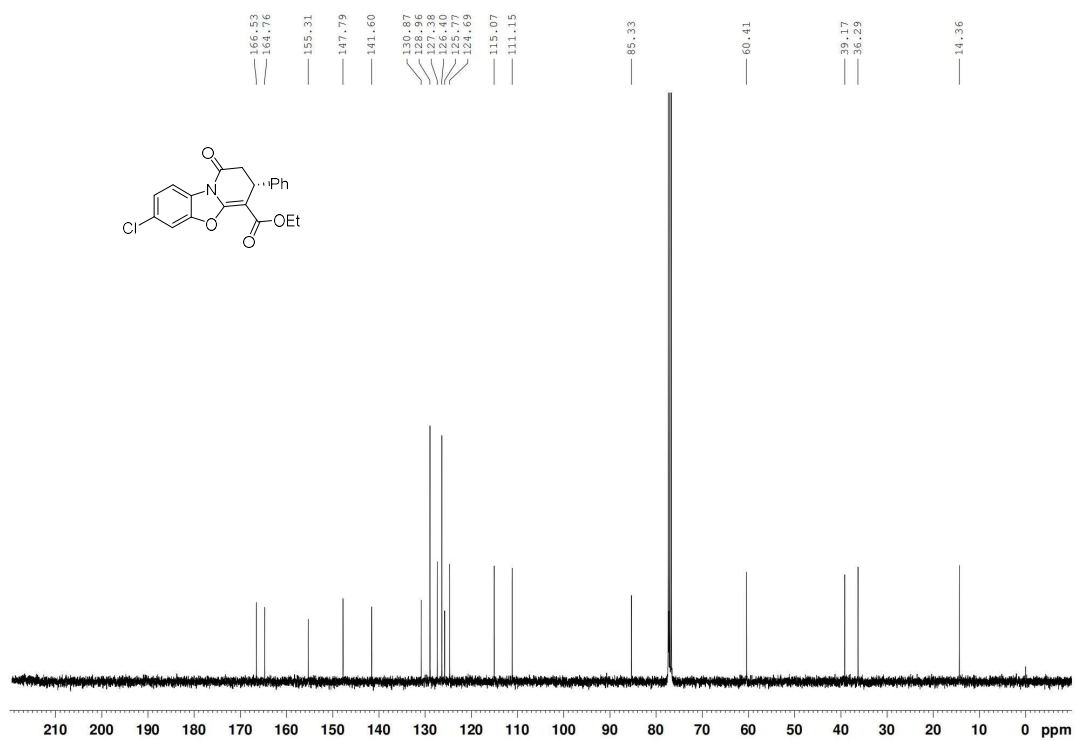

<sup>1</sup>H NMR spectrum of compound **3bf** (CDCl<sub>3</sub>, 400 MHz)

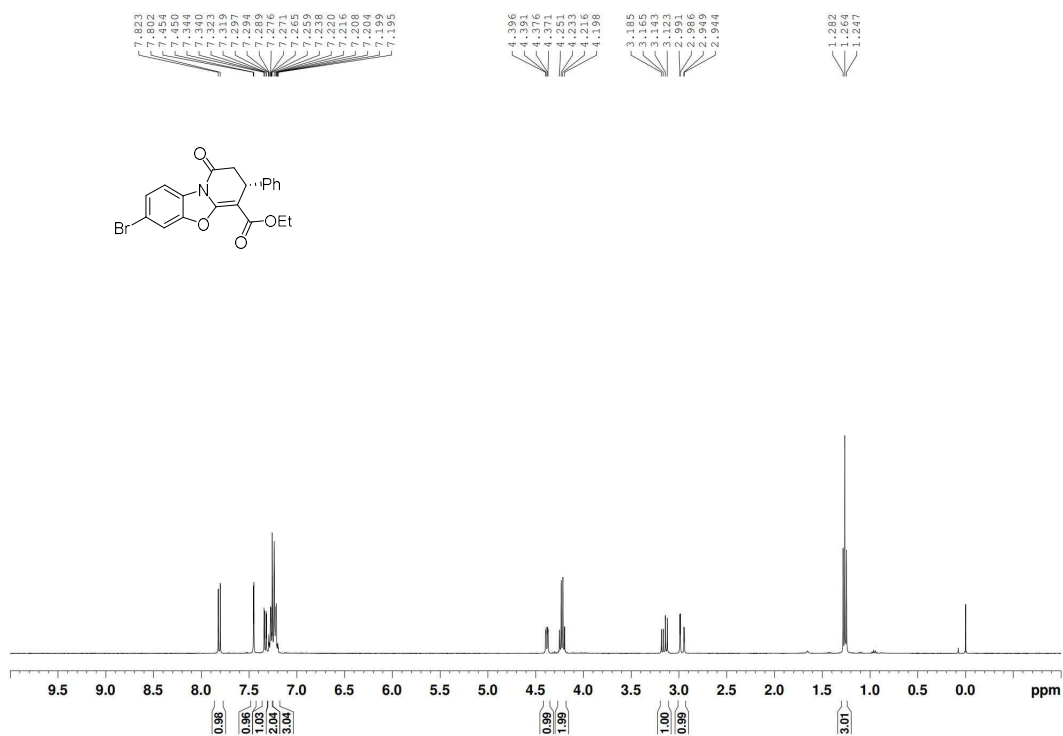

<sup>13</sup>C NMR spectrum of compound **3bf** (CDCl<sub>3</sub>, 100 MHz)

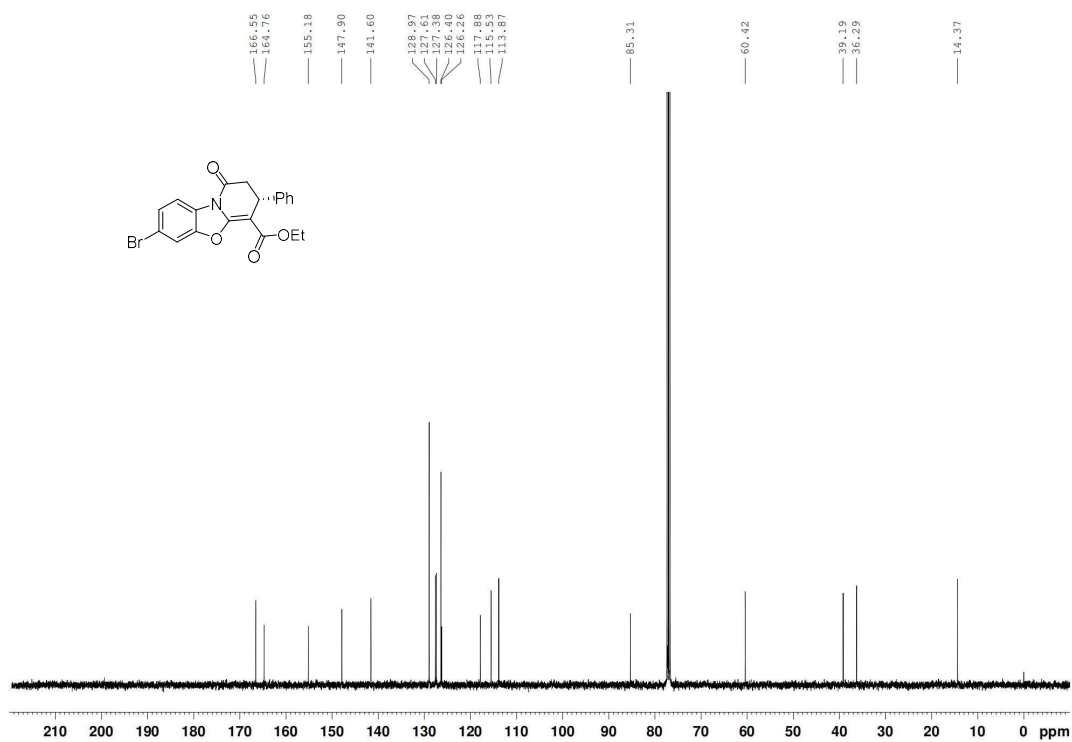

<sup>1</sup>H NMR spectrum of compound **3bg** (CDCl<sub>3</sub>, 400 MHz)

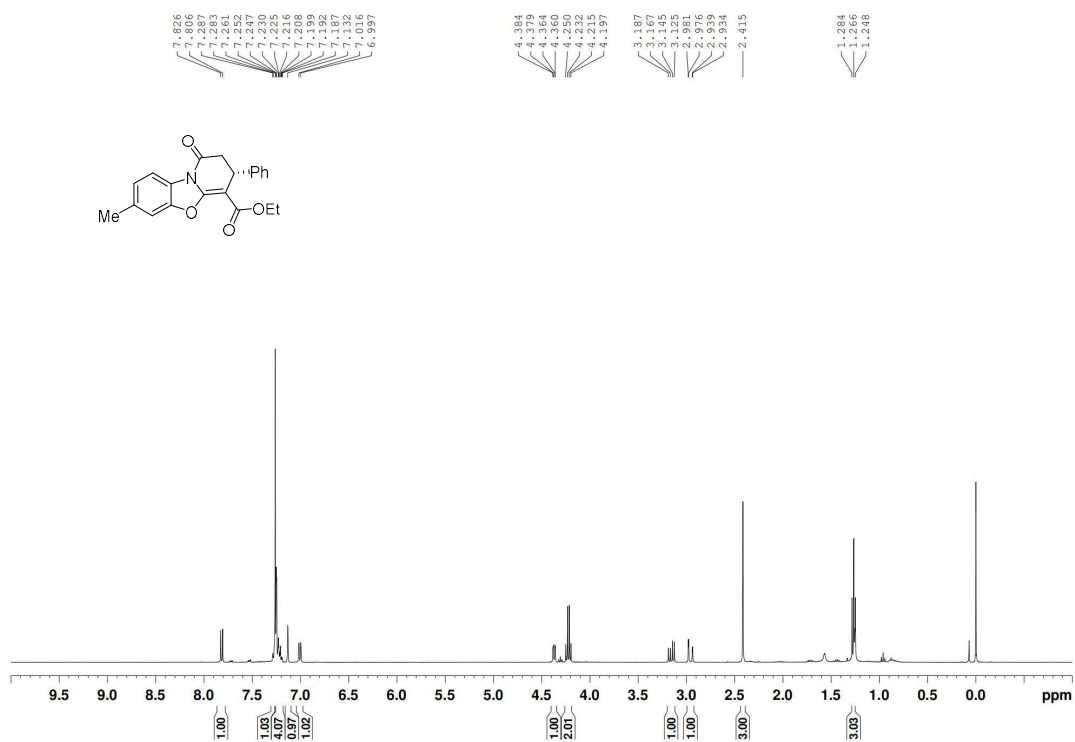

<sup>13</sup>C NMR spectrum of compound **3bg** (CDCl<sub>3</sub>, 100 MHz)

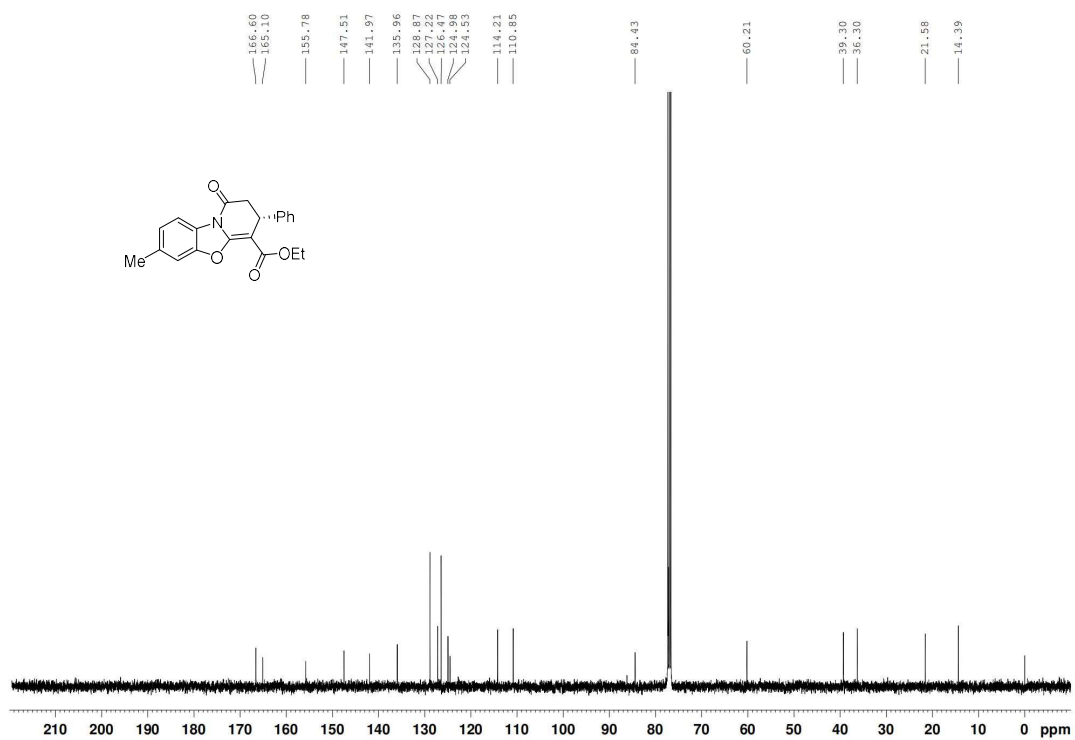

<sup>1</sup>H NMR spectrum of compound **3bh** (CDCl<sub>3</sub>, 400 MHz)

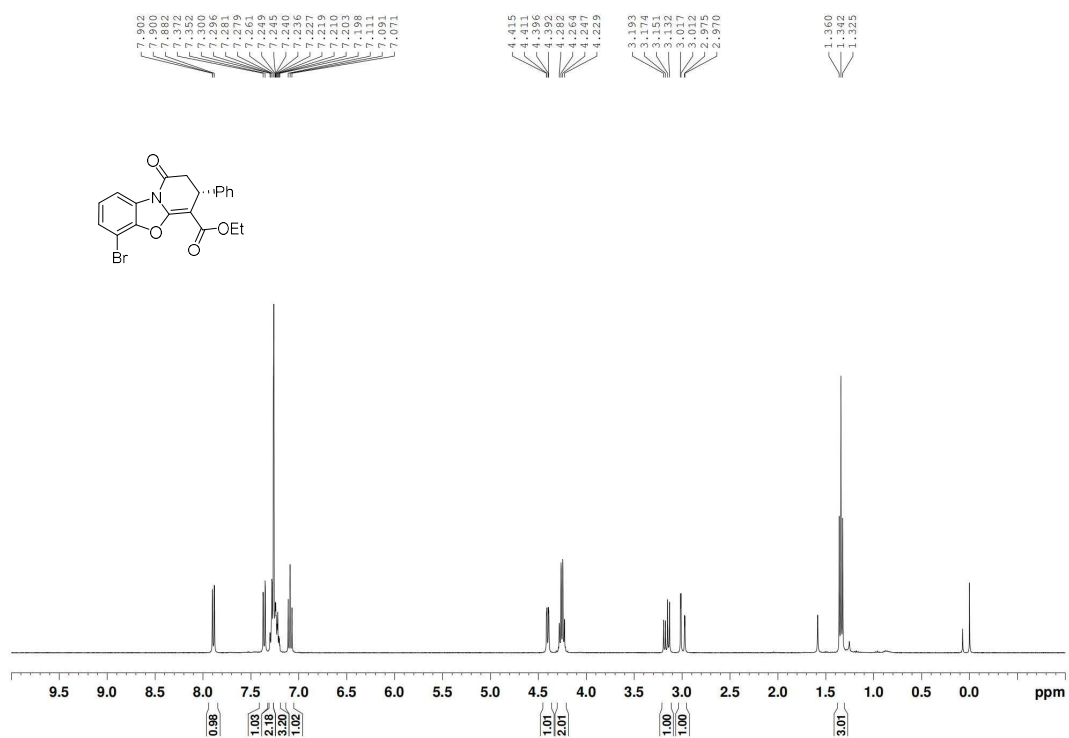

<sup>13</sup>C NMR spectrum of compound **3bh** (CDCl<sub>3</sub>, 100 MHz)

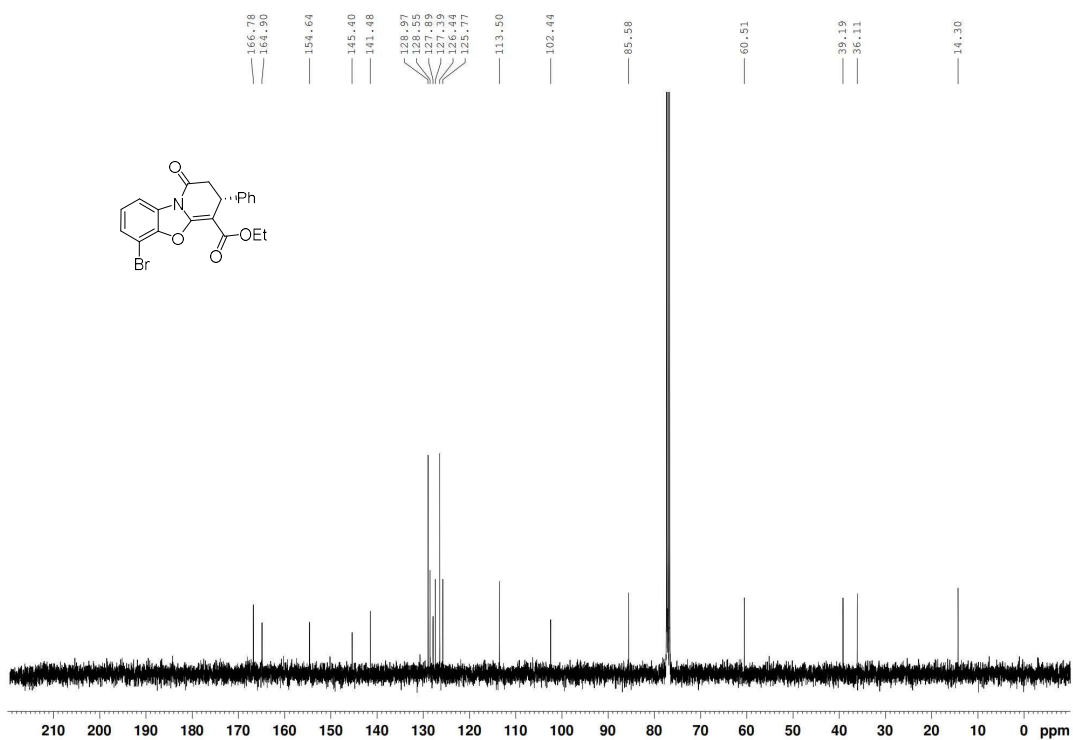



<sup>1</sup>H NMR spectrum of compound **3bi** (CDCl<sub>3</sub>, 400 MHz)

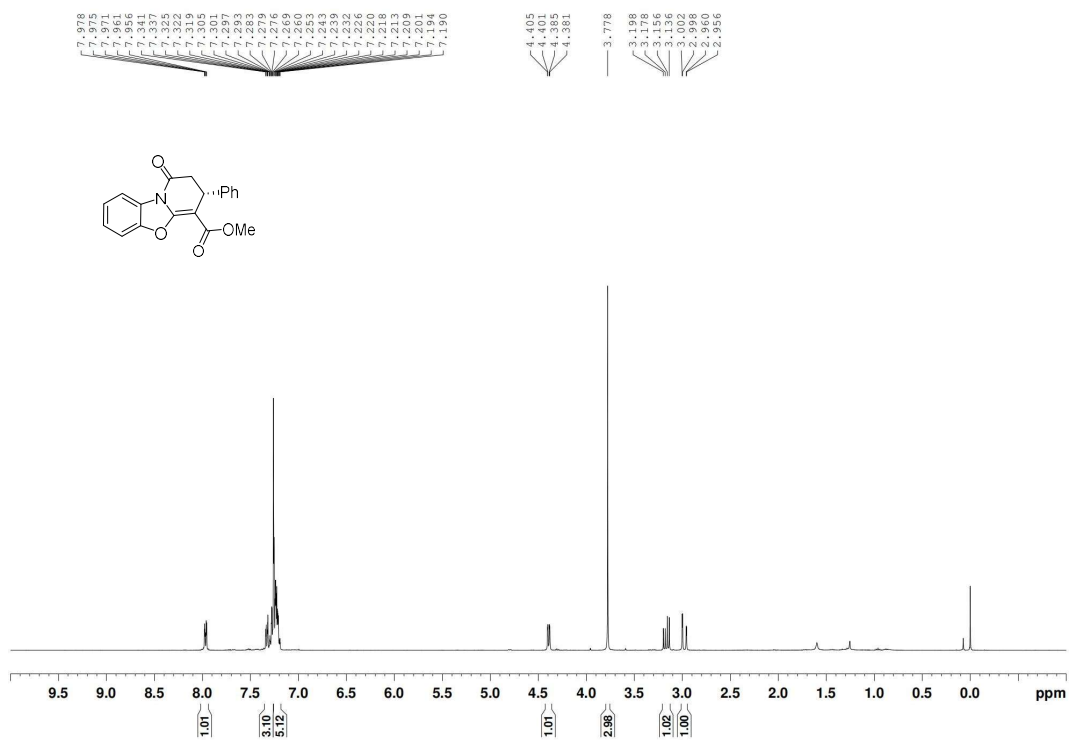

<sup>13</sup>C NMR spectrum of compound **3bi** (CDCl<sub>3</sub>, 100 MHz)

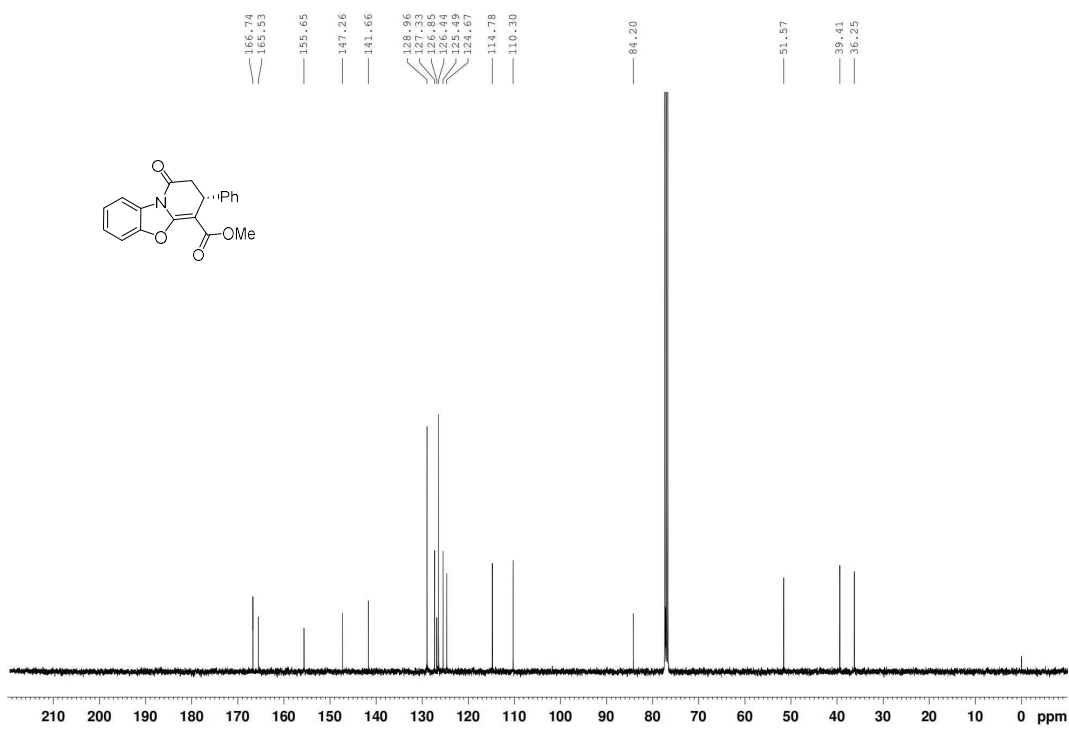

<sup>1</sup>H NMR spectrum of compound **3bj** (CDCl<sub>3</sub>, 400 MHz)

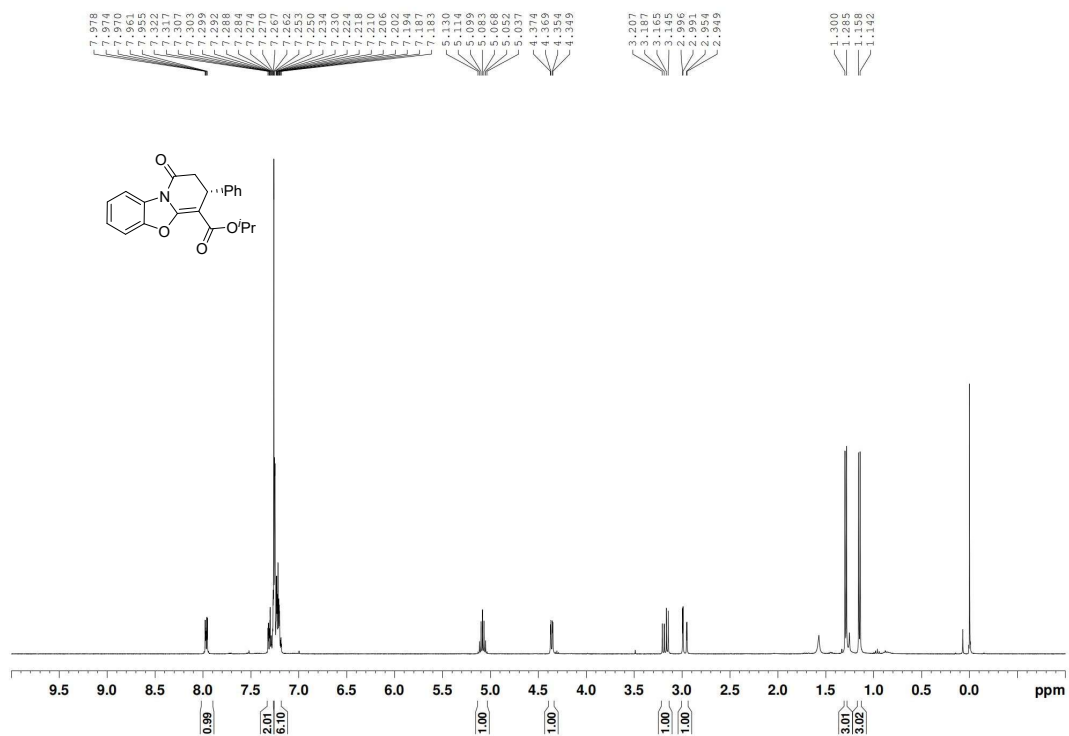

<sup>13</sup>C NMR spectrum of compound **3bj** (CDCl<sub>3</sub>, 100 MHz)

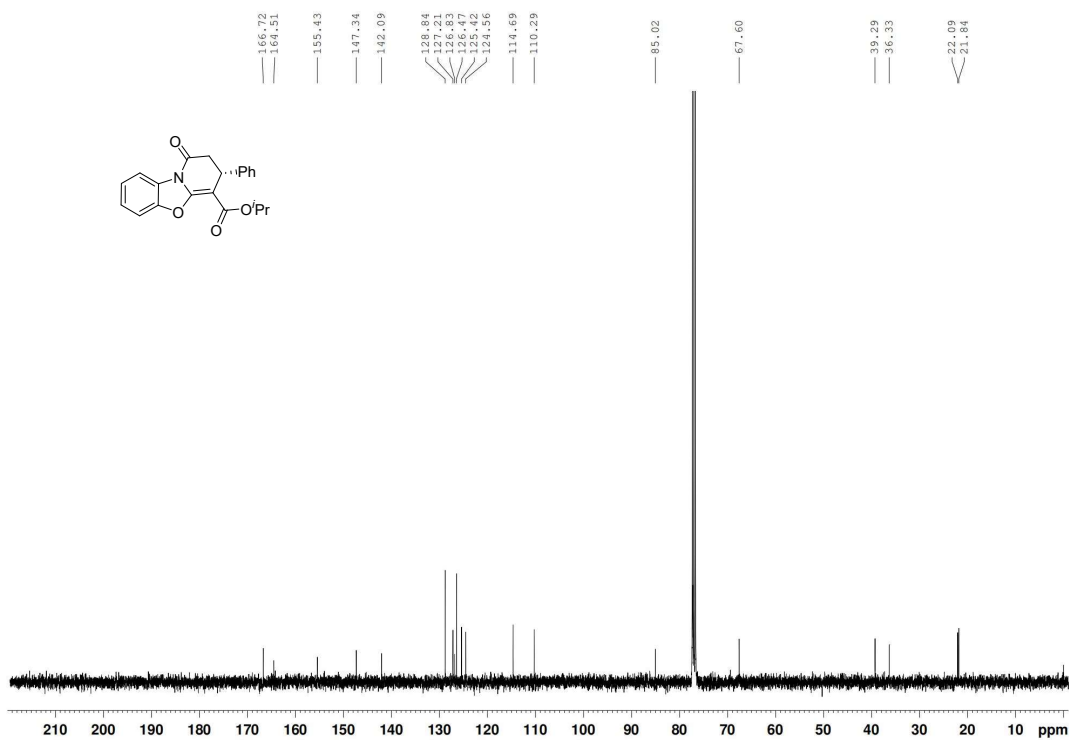

<sup>1</sup>H NMR spectrum of compound **3bk** (CDCl<sub>3</sub>, 400 MHz)

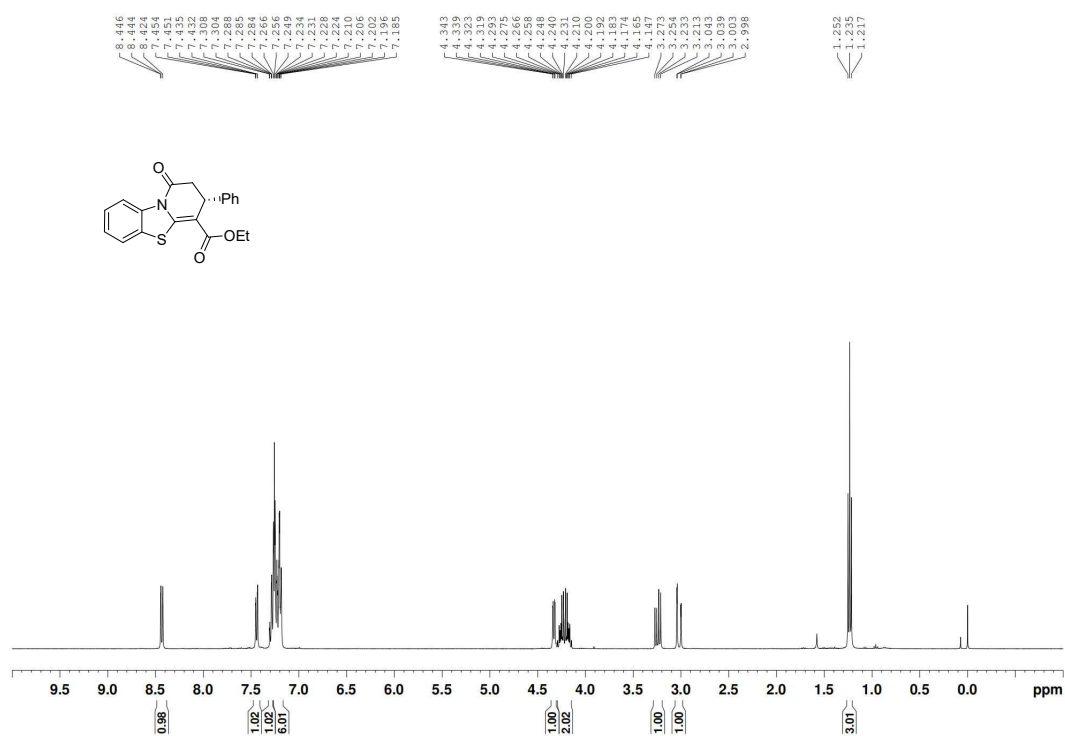

<sup>13</sup>C NMR spectrum of compound **3bk** (CDCl<sub>3</sub>, 100 MHz)

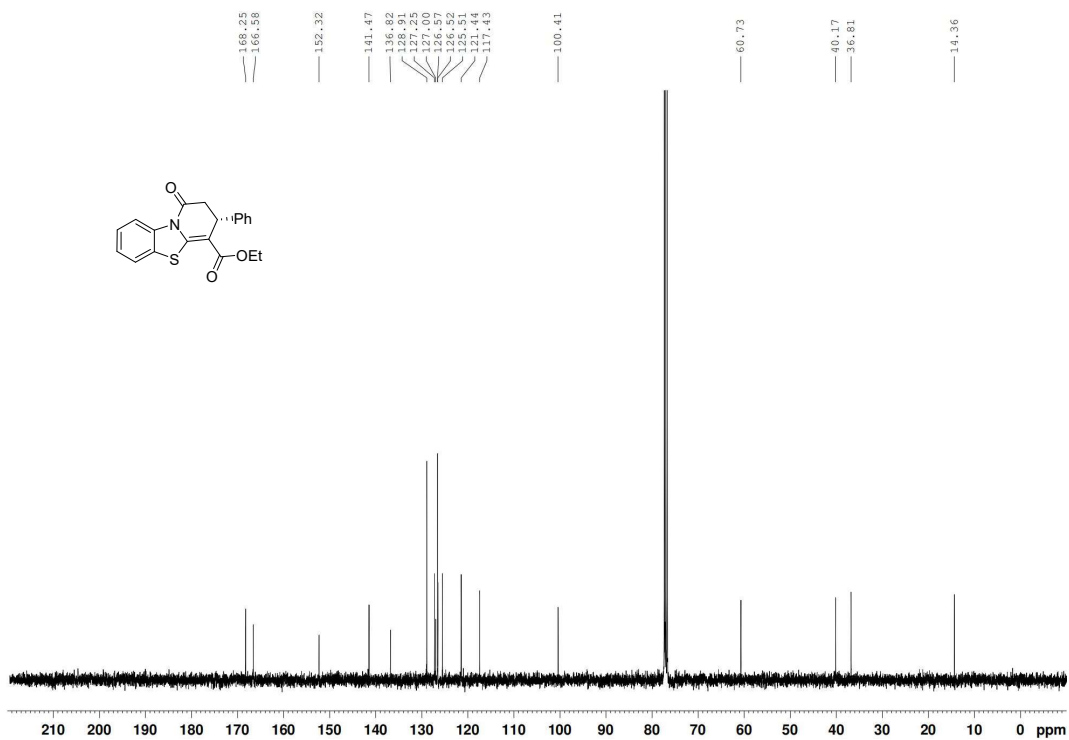

<sup>1</sup>H NMR spectrum of compound **3b1** (CDCl<sub>3</sub>, 400 MHz)

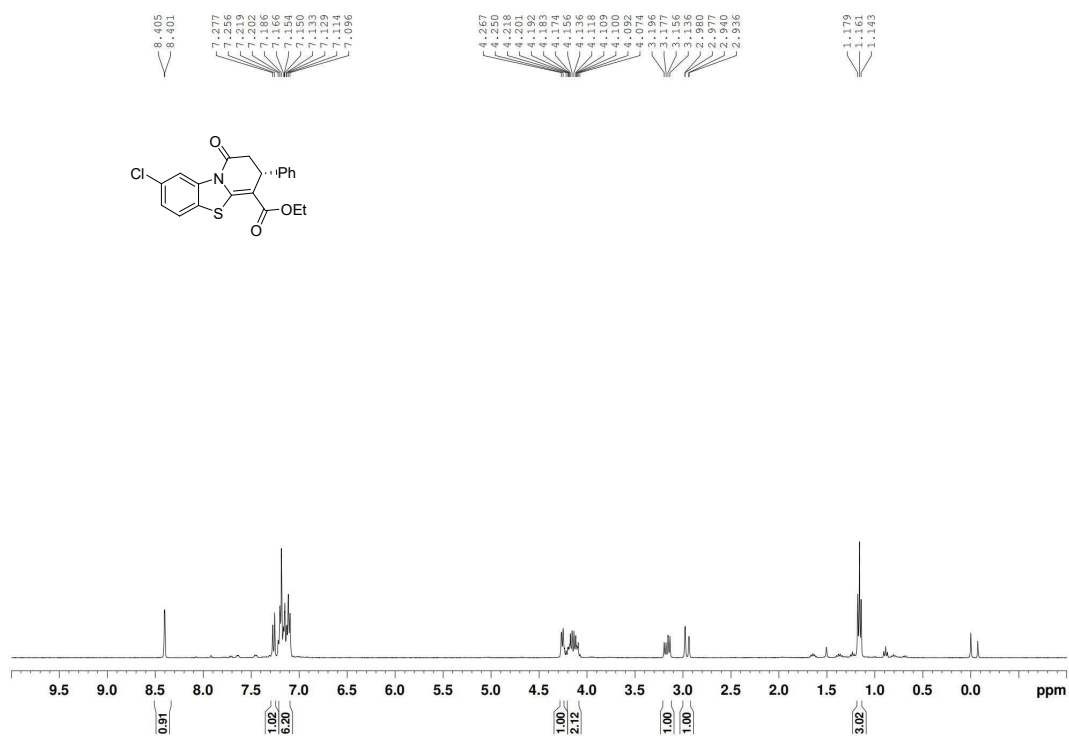

<sup>13</sup>C NMR spectrum of compound **3b1** (CDCl<sub>3</sub>, 100 MHz)

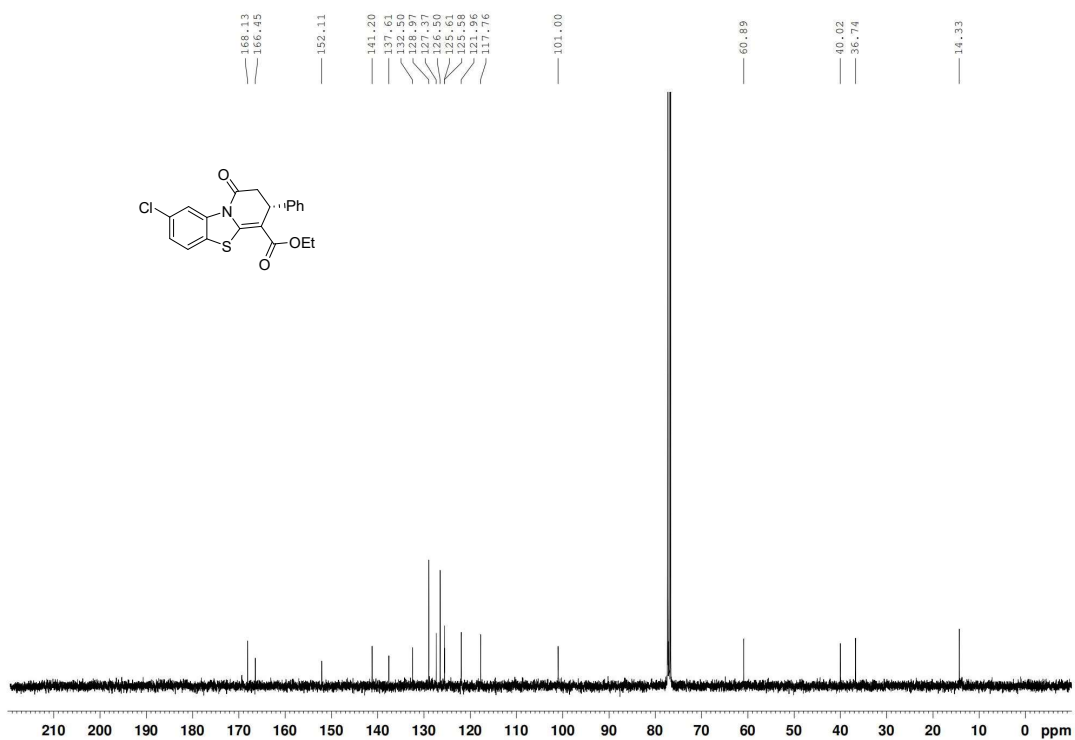

<sup>1</sup>H NMR spectrum of compound **4a** (CDCl<sub>3</sub>, 400 MHz)

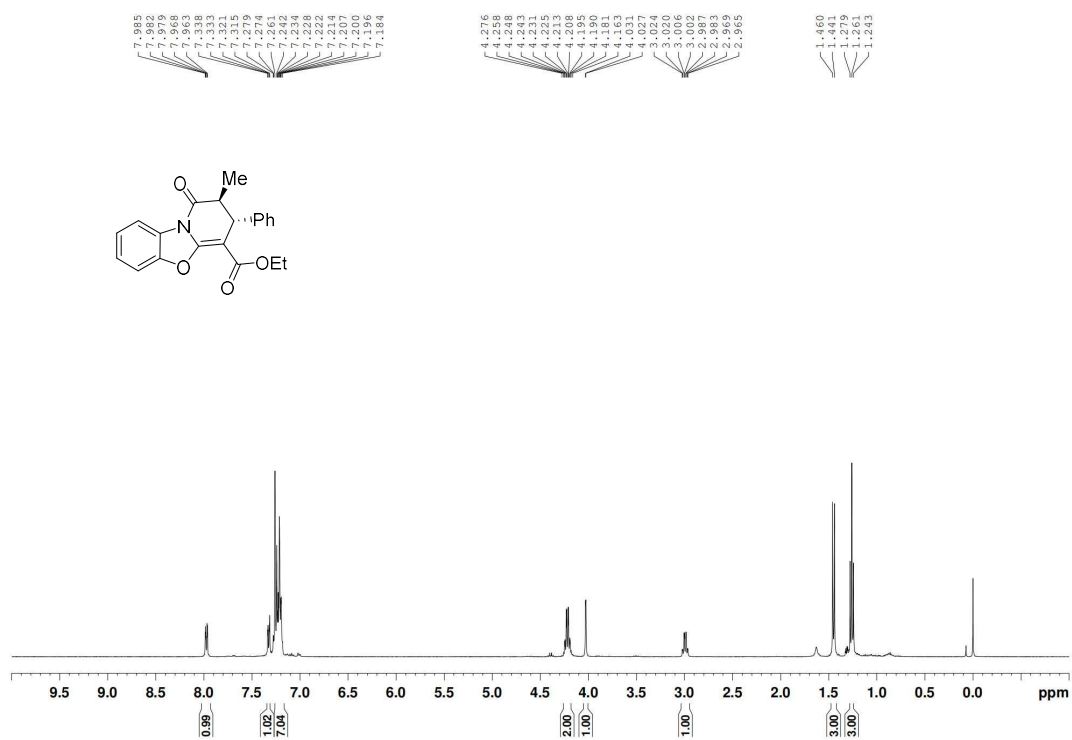

<sup>13</sup>C NMR spectrum of compound **4a** (CDCl<sub>3</sub>, 100 MHz)

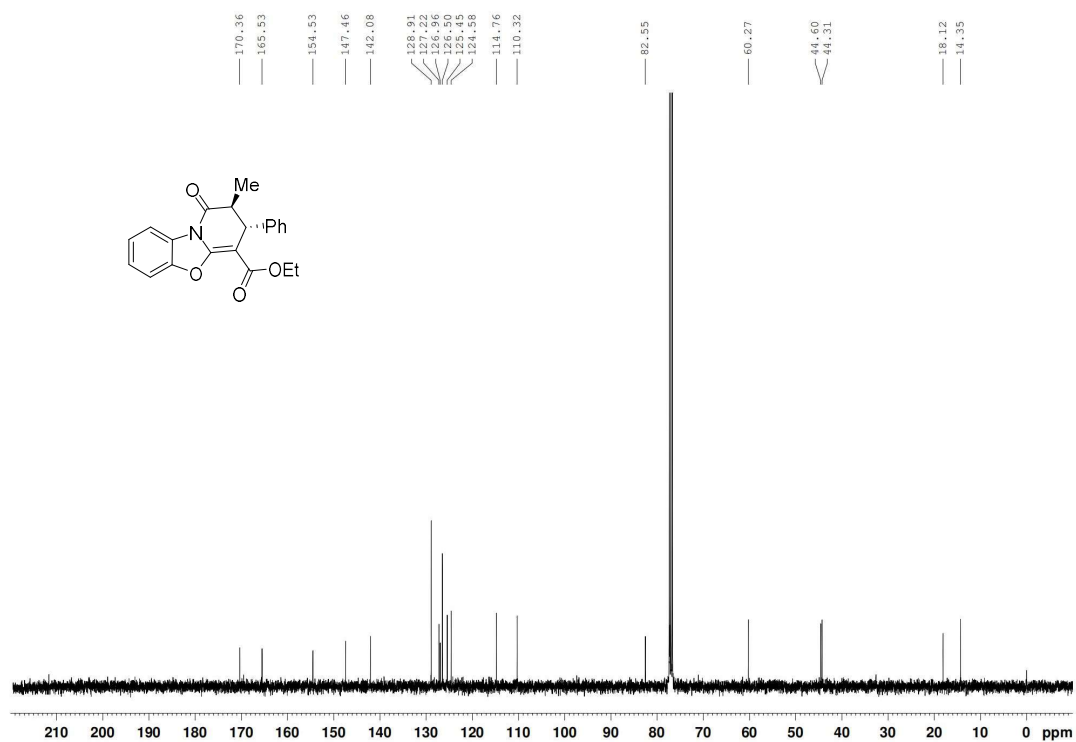

## 8. HPLC spectra for compounds 3aa–3bl and 4a

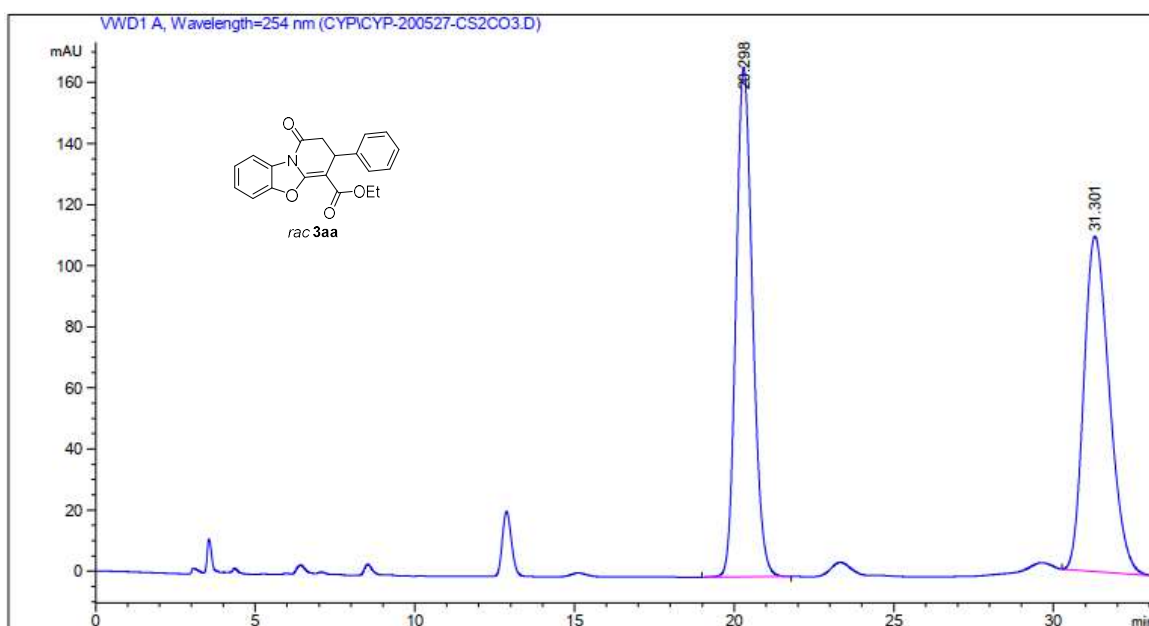

| Peak | Processed channel | Retention time (min) | Peak area (mAU*s) | Peak height (mAU) | Peak area (%) |
|------|-------------------|----------------------|-------------------|-------------------|---------------|
| 1    | PDA 254 nm        | 20.298               | 6002.87793        | 166.75209         | 49.6987       |
| 2    | PDA 254 nm        | 31.301               | 6075.67188        | 109.78319         | 50.3013       |

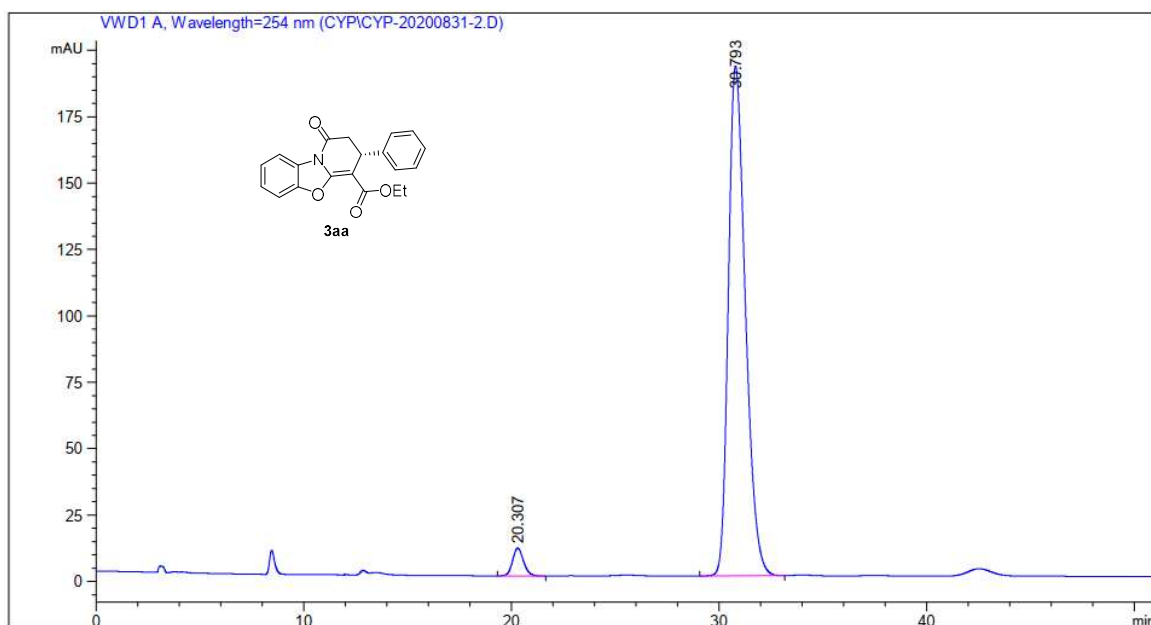

| Peak | Processed channel | Retention time (min) | Peak area (mAU*s) | Peak height (mAU) | Peak area (%) |
|------|-------------------|----------------------|-------------------|-------------------|---------------|
| 1    | PDA 254 nm        | 20.307               | 383.84830         | 10.49188          | 3.3942        |
| 2    | PDA 254 nm        | 30.793               | 1.09251e4         | 192.11090         | 96.6058       |

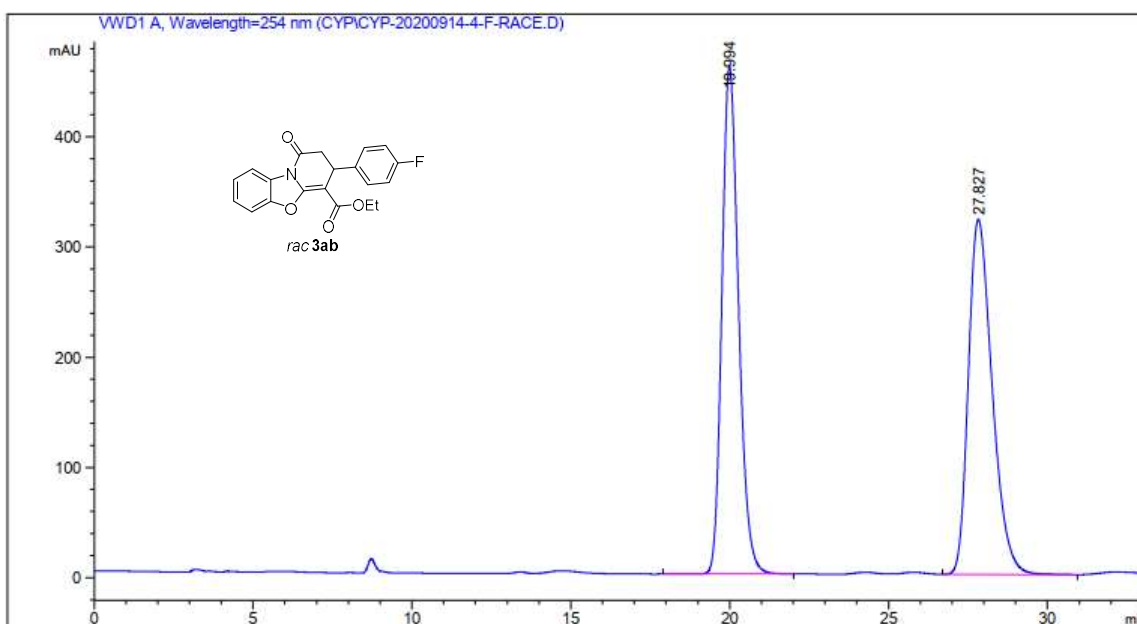

| Peak | Processed channel | Retention time (min) | Peak area (mAU*s) | Peak height (mAU) | Peak area (%) |
|------|-------------------|----------------------|-------------------|-------------------|---------------|
| 1    | PDA 254 nm        | 19.994               | 1.67987e4         | 460.32977         | 50.0674       |
| 2    | PDA 254 nm        | 27.827               | 1.67535e4         | 322.24973         | 49.9326       |

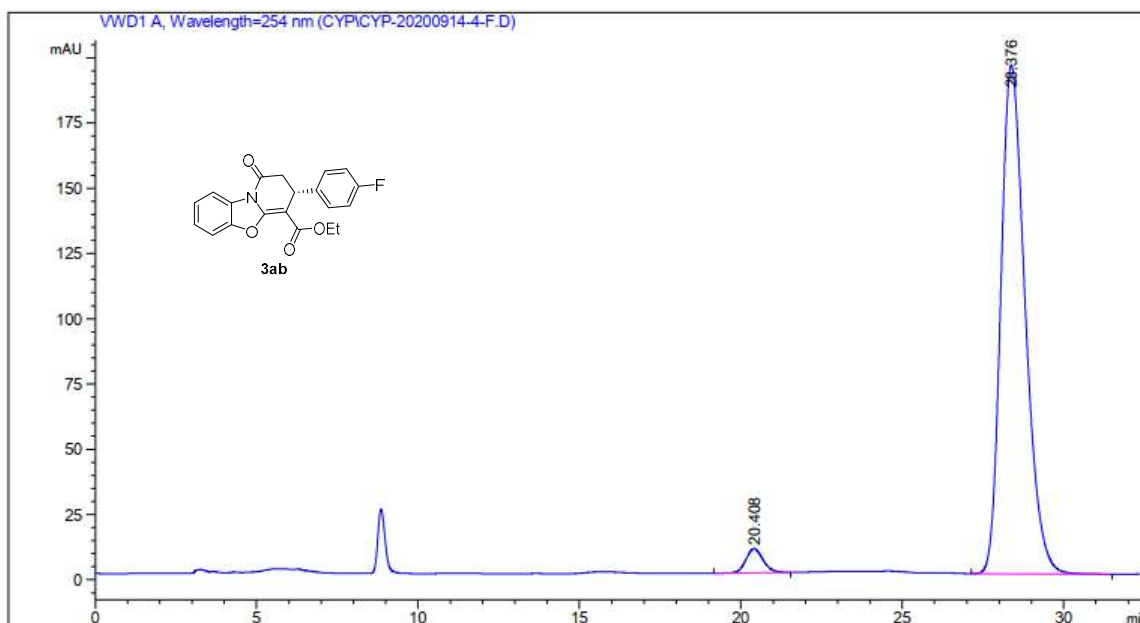

| Peak | Processed channel | Retention time (min) | Peak area (mAU*s) | Peak height (mAU) | Peak area (%) |
|------|-------------------|----------------------|-------------------|-------------------|---------------|
| 1    | PDA 254 nm        | 20.408               | 338.99246         | 9.19481           | 3.2225        |
| 2    | PDA 254 nm        | 28.376               | 1.01804e4         | 194.85330         | 96.7775       |

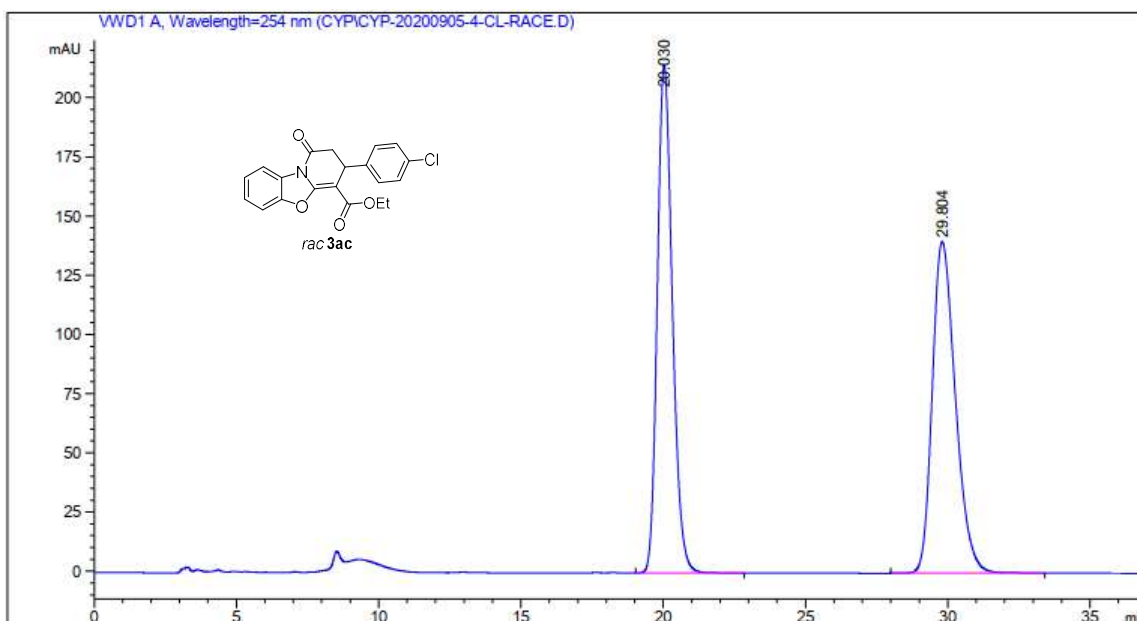

| Peak | Processed channel | Retention time (min) | Peak area (mAU*s) | Peak height (mAU) | Peak area (%) |
|------|-------------------|----------------------|-------------------|-------------------|---------------|
| 1    | PDA 254 nm        | 20.030               | 7871.58838        | 214.30270         | 49.8838       |
| 2    | PDA 254 nm        | 29.804               | 7908.25098        | 140.05756         | 50.1162       |

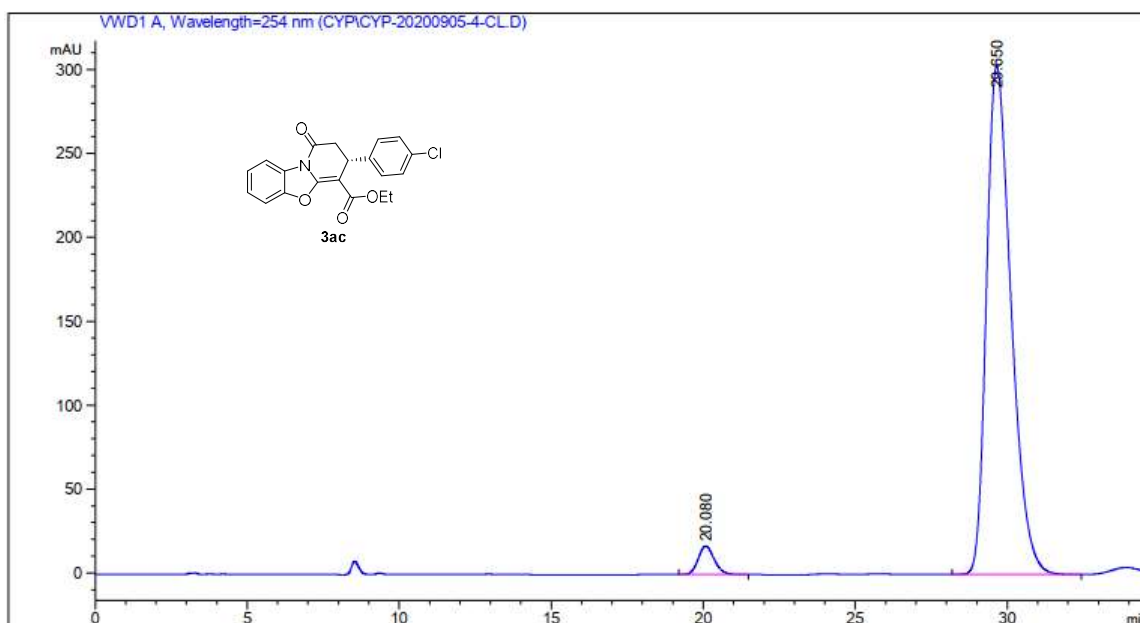

| Peak | Processed channel | Retention time (min) | Peak area (mAU*s) | Peak height (mAU) | Peak area (%) |
|------|-------------------|----------------------|-------------------|-------------------|---------------|
| 1    | PDA 254 nm        | 20.080               | 622.45898         | 16.94693          | 3.5176        |
| 2    | PDA 254 nm        | 29.650               | 1.70731e4         | 303.21915         | 96.4824       |



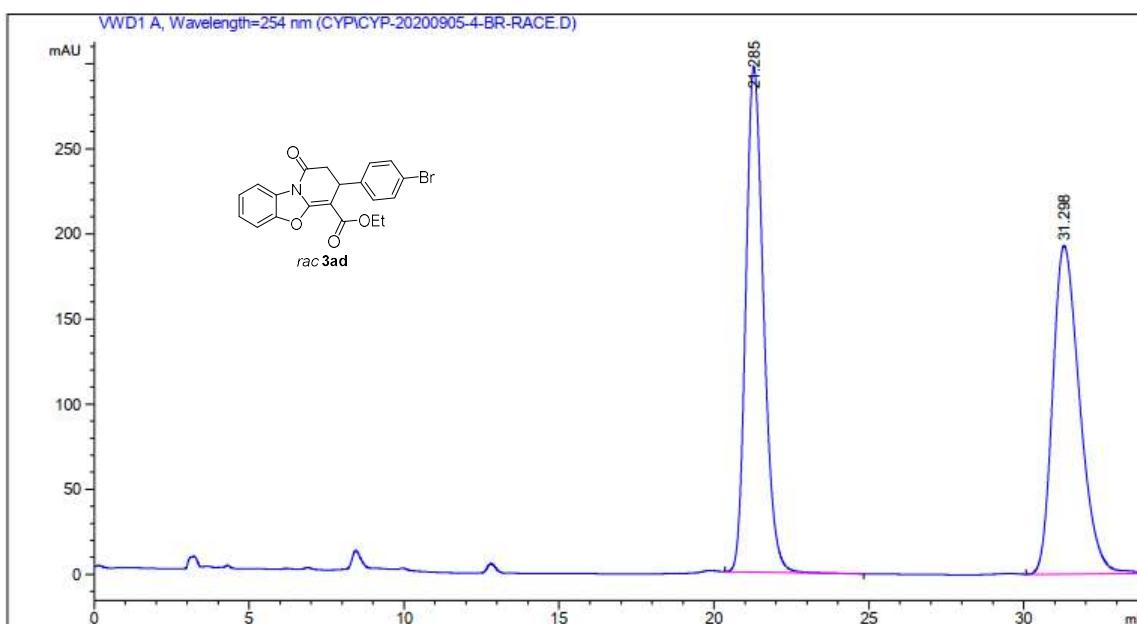

| Peak | Processed channel | Retention time (min) | Peak area (mAU*s) | Peak height (mAU) | Peak area (%) |
|------|-------------------|----------------------|-------------------|-------------------|---------------|
| 1    | PDA 254 nm        | 21.285               | 1.17983e4         | 296.81769         | 50.2767       |
| 2    | PDA 254 nm        | 31.298               | 1.16684e4         | 192.89743         | 49.7233       |

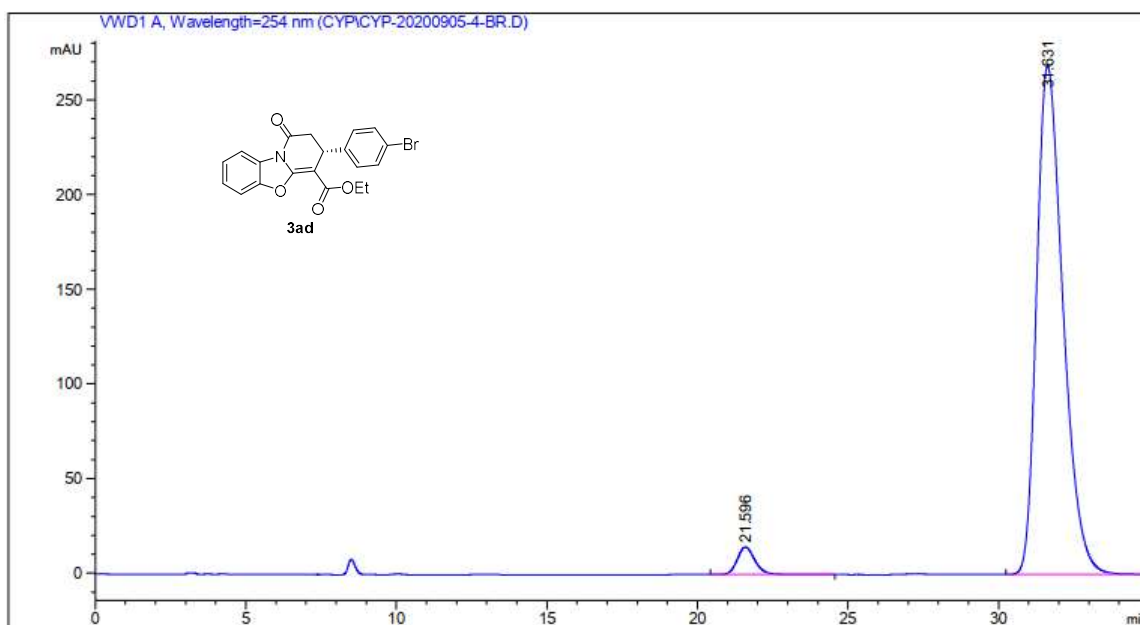

| Peak | Processed channel | Retention time (min) | Peak area (mAU*s) | Peak height (mAU) | Peak area (%) |
|------|-------------------|----------------------|-------------------|-------------------|---------------|
| 1    | PDA 254 nm        | 21.596               | 600.28424         | 14.52697          | 3.5377        |
| 2    | PDA 254 nm        | 31.631               | 1.63680e4         | 268.64886         | 96.4623       |

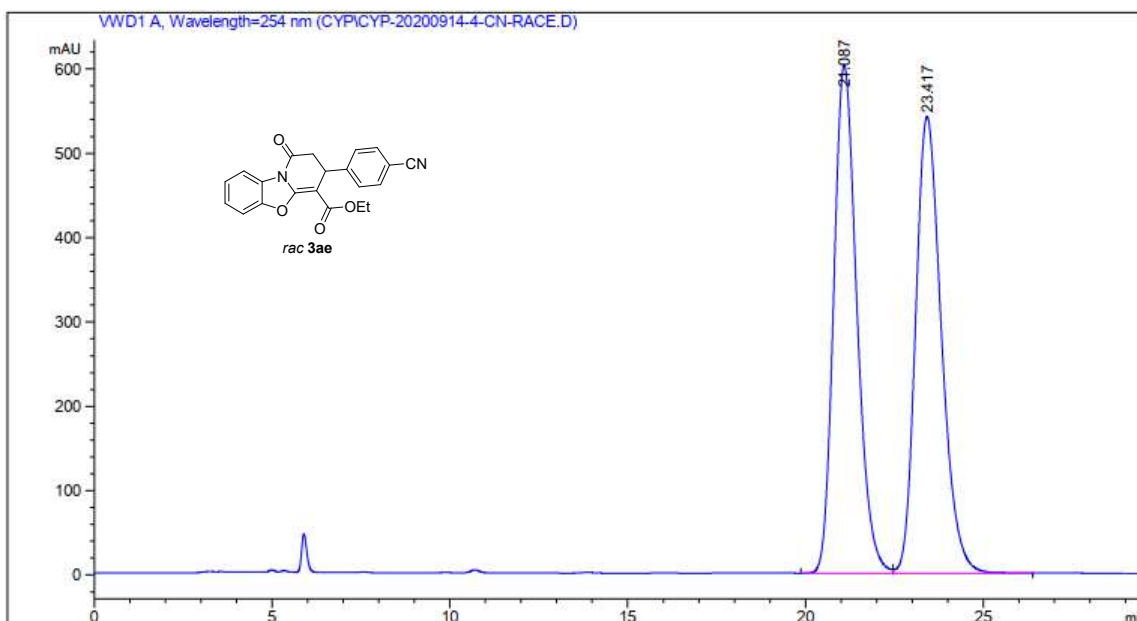

| Peak | Processed channel | Retention time (min) | Peak area (mAU*s) | Peak height (mAU) | Peak area (%) |
|------|-------------------|----------------------|-------------------|-------------------|---------------|
| 1    | PDA 254 nm        | 21.087               | 2.71015e4         | 602.21423         | 49.8718       |
| 2    | PDA 254 nm        | 23.417               | 2.72408e4         | 541.13568         | 50.1282       |

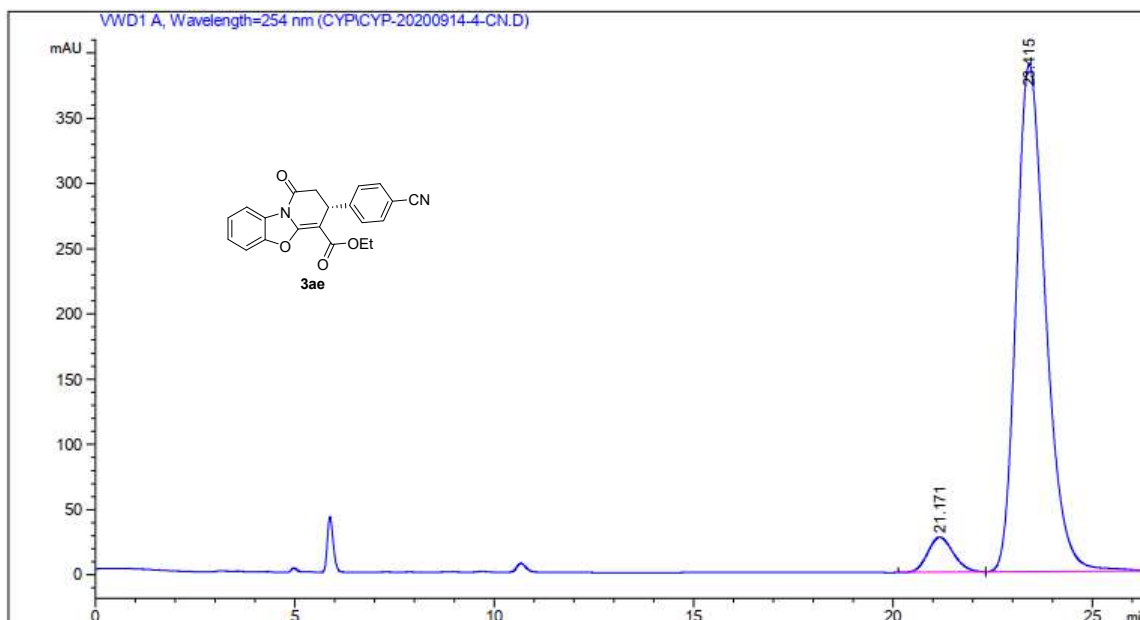

| Peak | Processed channel | Retention time (min) | Peak area (mAU*s) | Peak height (mAU) | Peak area (%) |
|------|-------------------|----------------------|-------------------|-------------------|---------------|
| 1    | PDA 254 nm        | 21.171               | 1205.31079        | 26.91505          | 5.7167        |
| 2    | PDA 254 nm        | 23.415               | 1.98786e4         | 388.87106         | 94.2833       |

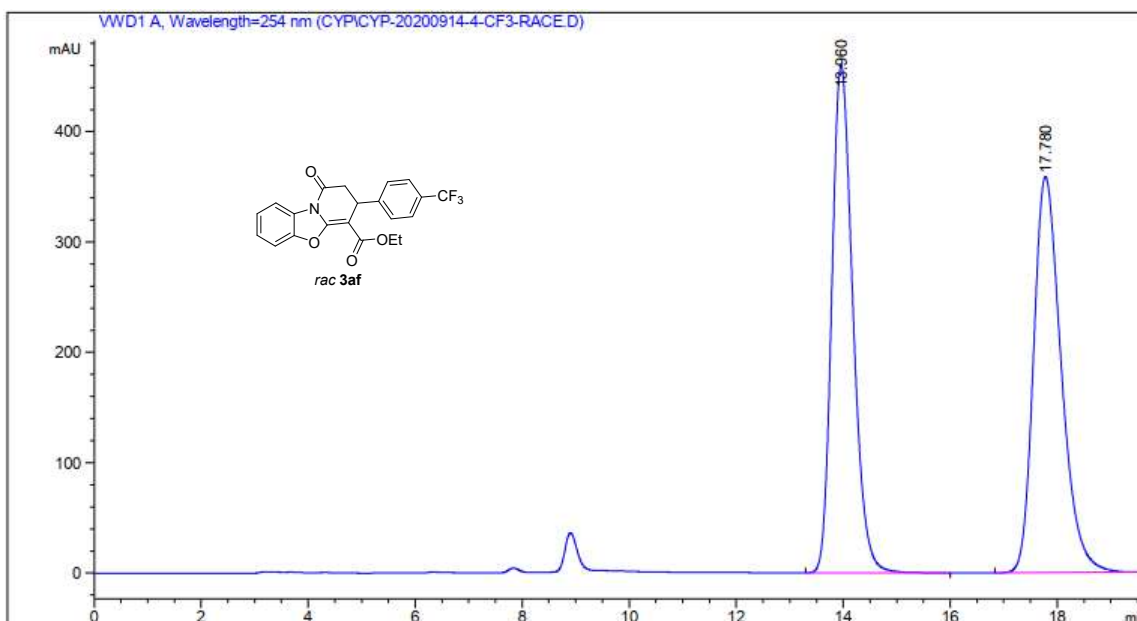

| Peak | Processed channel | Retention time (min) | Peak area (mAU*s) | Peak height (mAU) | Peak area (%) |
|------|-------------------|----------------------|-------------------|-------------------|---------------|
| 1    | PDA 254 nm        | 13.960               | 1.25232e4         | 459.76578         | 49.3095       |
| 2    | PDA 254 nm        | 17.780               | 1.28739e4         | 358.77695         | 50.6905       |

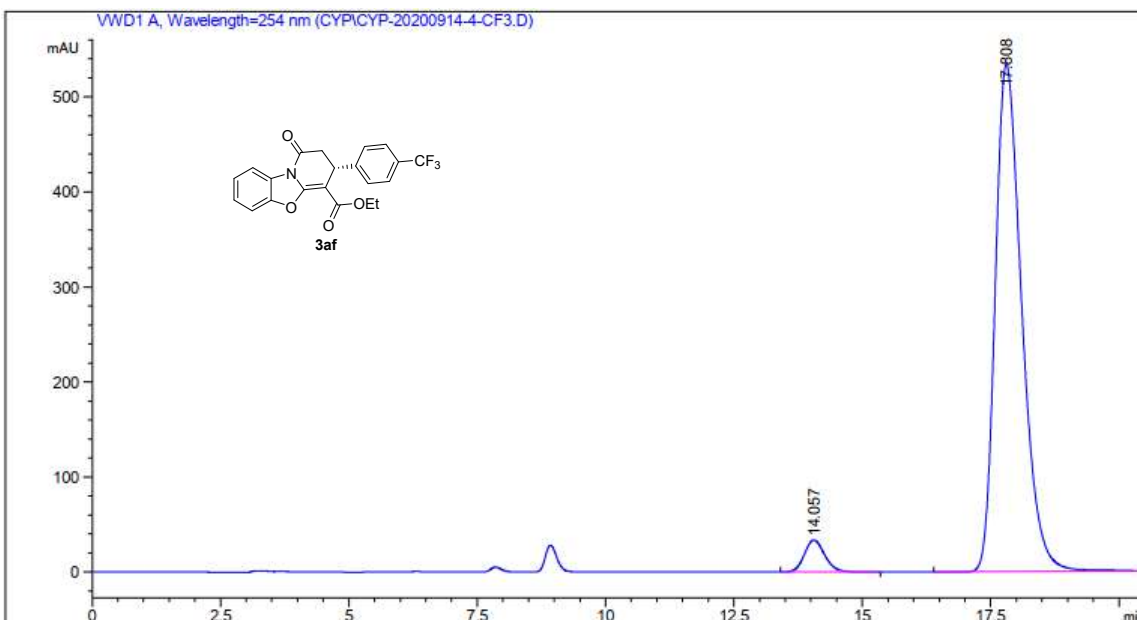

| Peak | Processed channel | Retention time (min) | Peak area (mAU*s) | Peak height (mAU) | Peak area (%) |
|------|-------------------|----------------------|-------------------|-------------------|---------------|
| 1    | PDA 254 nm        | 14.057               | 929.37653         | 33.67273          | 4.6185        |
| 2    | PDA 254 nm        | 17.808               | 1.91936e4         | 533.90491         | 95.3815       |

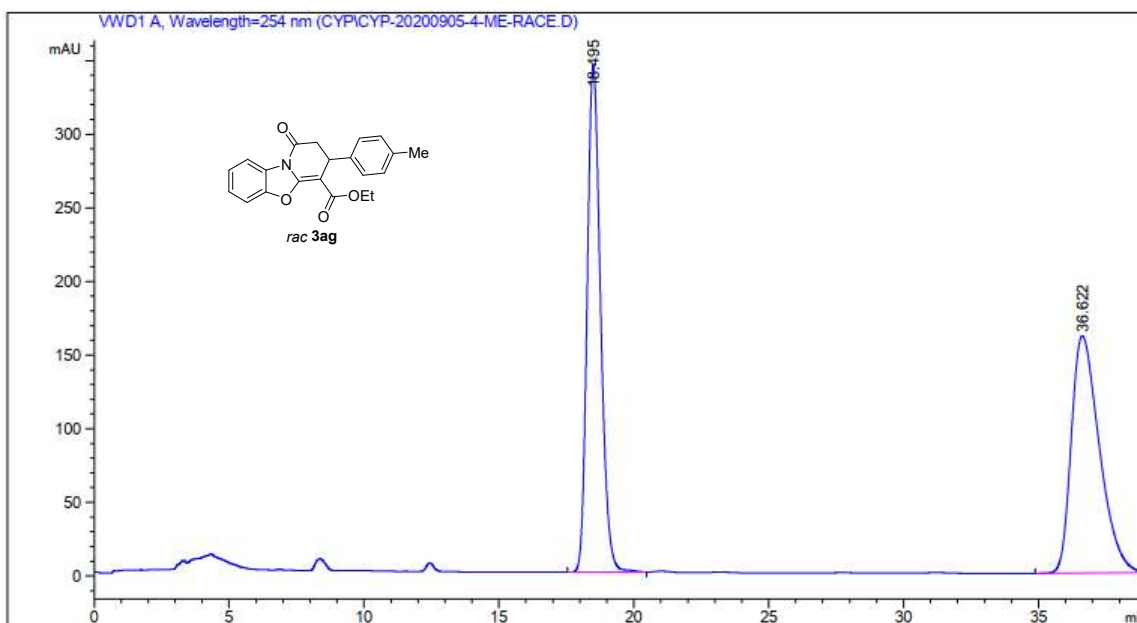

| Peak | Processed channel | Retention time (min) | Peak area (mAU*s) | Peak height (mAU) | Peak area (%) |
|------|-------------------|----------------------|-------------------|-------------------|---------------|
| 1    | PDA 254 nm        | 18.495               | 1.18023e4         | 344.18829         | 50.3496       |
| 2    | PDA 254 nm        | 36.622               | 1.16384e4         | 161.12749         | 49.6504       |

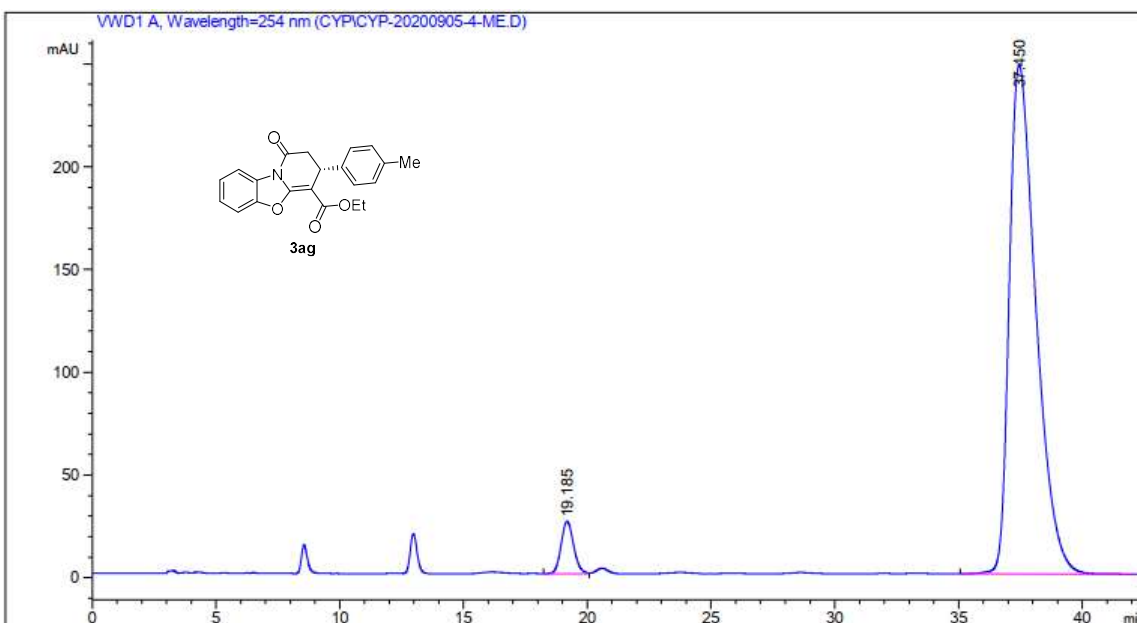

| Peak | Processed channel | Retention time (min) | Peak area (mAU*s) | Peak height (mAU) | Peak area (%) |
|------|-------------------|----------------------|-------------------|-------------------|---------------|
| 1    | PDA 254 nm        | 19.185               | 897.43665         | 25.49978          | 4.6326        |
| 2    | PDA 254 nm        | 37.450               | 1.84748e4         | 247.48122         | 95.3674       |

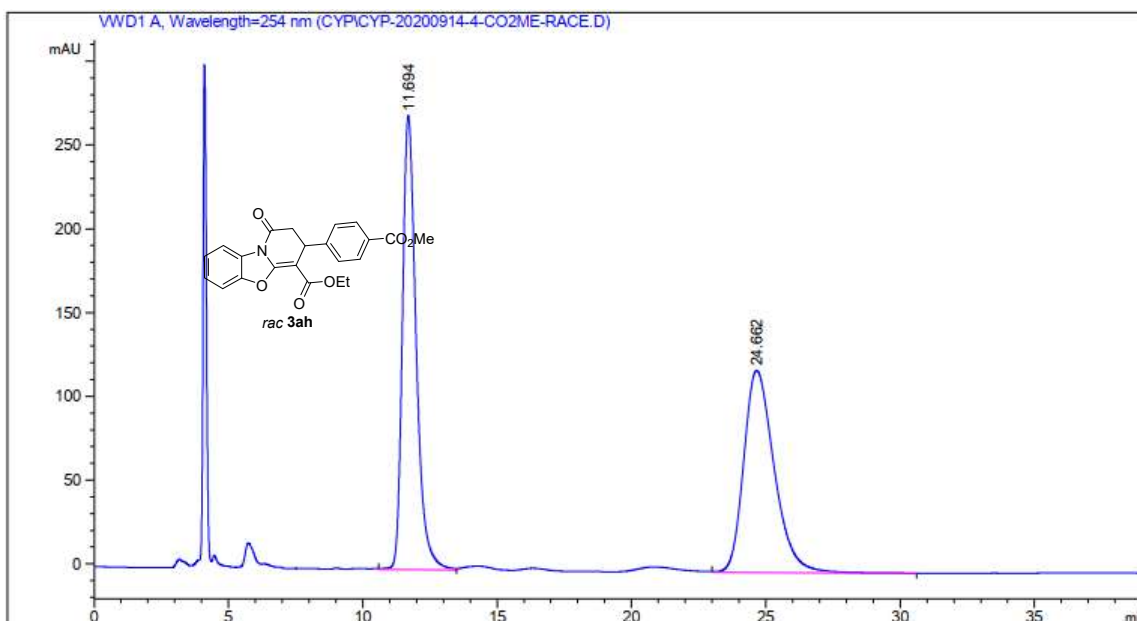

| Peak | Processed channel | Retention time (min) | Peak area (mAU*s) | Peak height (mAU) | Peak area (%) |
|------|-------------------|----------------------|-------------------|-------------------|---------------|
| 1    | PDA 254 nm        | 11.694               | 9623.54199        | 270.94858         | 50.2898       |
| 2    | PDA 254 nm        | 24.662               | 9512.61621        | 120.62074         | 49.7102       |

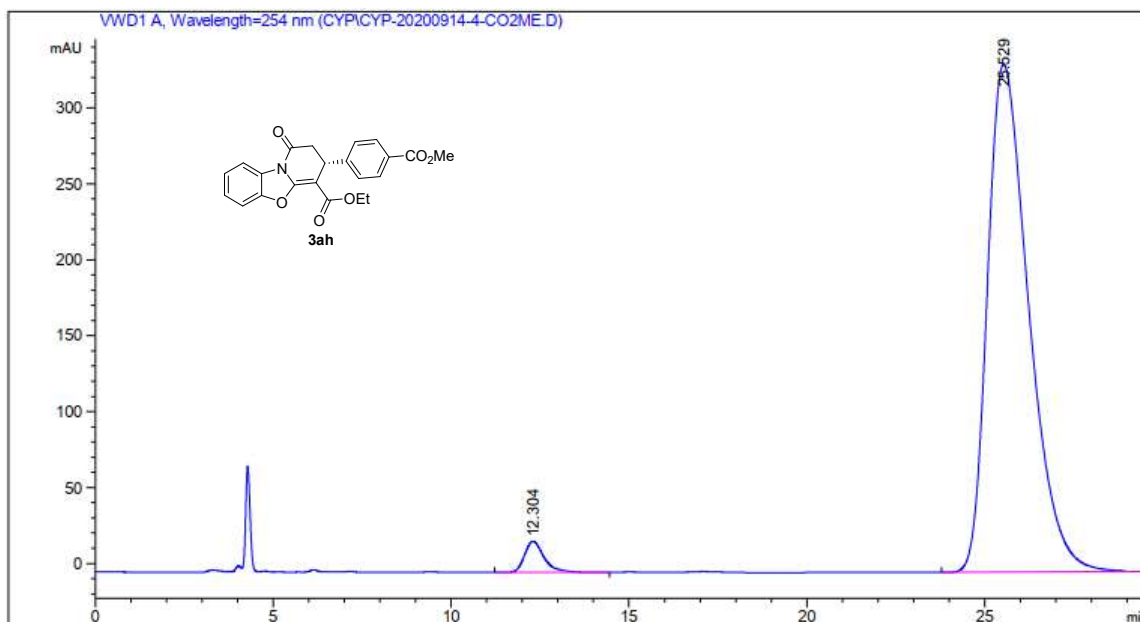

| Peak | Processed channel | Retention time (min) | Peak area (mAU*s) | Peak height (mAU) | Peak area (%) |
|------|-------------------|----------------------|-------------------|-------------------|---------------|
| 1    | PDA 254 nm        | 12.304               | 797.24841         | 20.60139          | 2.8794        |
| 2    | PDA 254 nm        | 25.529               | 2.68907e4         | 334.49060         | 97.1206       |

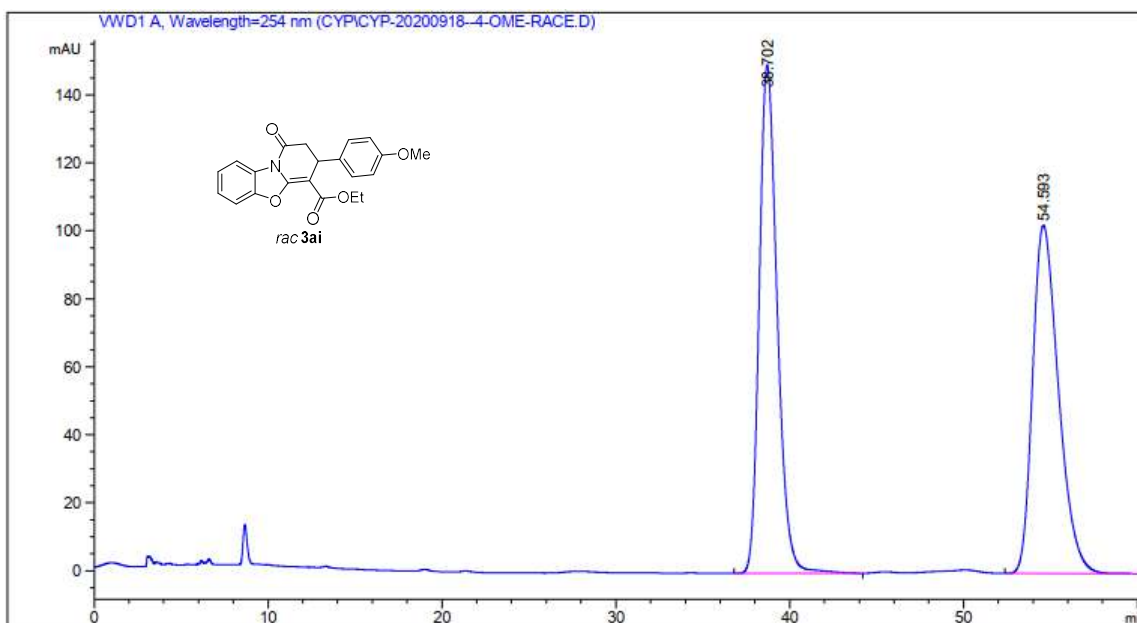

| Peak | Processed channel | Retention time (min) | Peak area (mAU*s) | Peak height (mAU) | Peak area (%) |
|------|-------------------|----------------------|-------------------|-------------------|---------------|
| 1    | PDA 254 nm        | 38.702               | 1.07478e4         | 149.53275         | 50.3708       |
| 2    | PDA 254 nm        | 54.593               | 1.05896e4         | 102.46915         | 49.6292       |

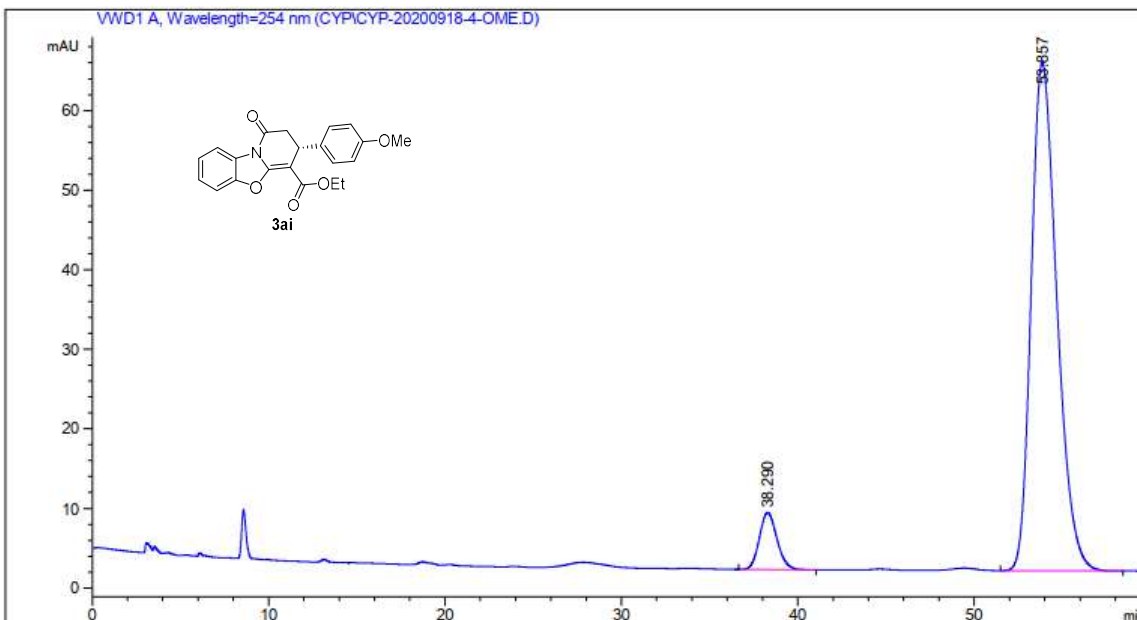

| Peak | Processed channel | Retention time (min) | Peak area (mAU*s) | Peak height (mAU) | Peak area (%) |
|------|-------------------|----------------------|-------------------|-------------------|---------------|
| 1    | PDA 254 nm        | 38.290               | 500.92804         | 7.18832           | 7.2054        |
| 2    | PDA 254 nm        | 53.857               | 6451.21436        | 63.90611          | 92.7946       |

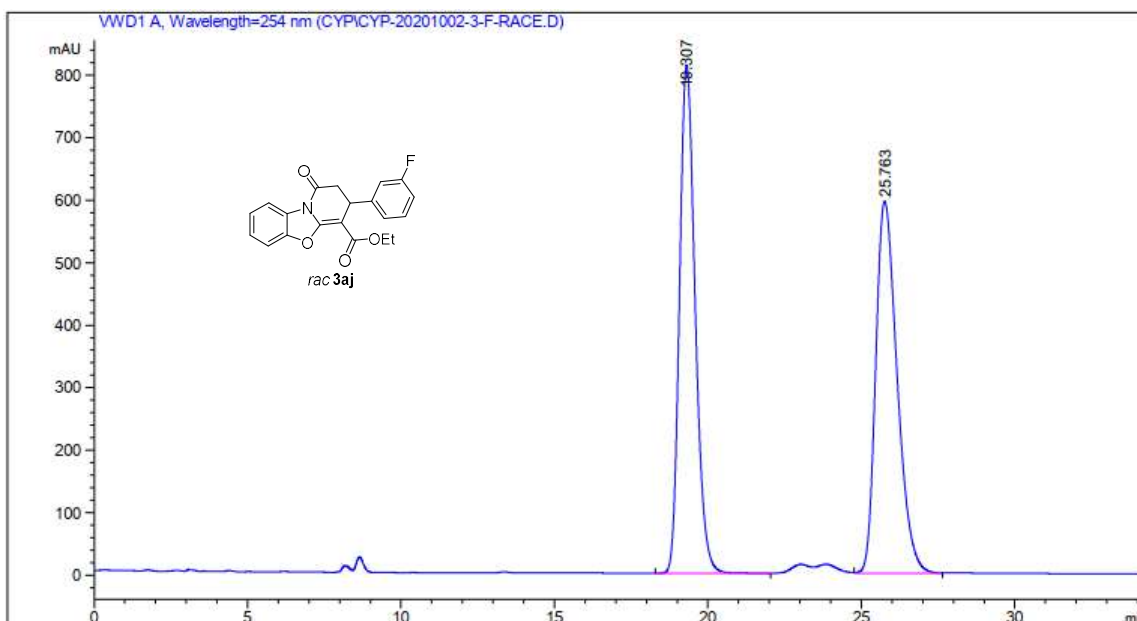

| Peak | Processed channel | Retention time (min) | Peak area (mAU*s) | Peak height (mAU) | Peak area (%) |
|------|-------------------|----------------------|-------------------|-------------------|---------------|
| 1    | PDA 254 nm        | 19.307               | 2.87789e4         | 812.38214         | 49.9702       |
| 2    | PDA 254 nm        | 25.763               | 2.88132e4         | 595.01257         | 50.0298       |

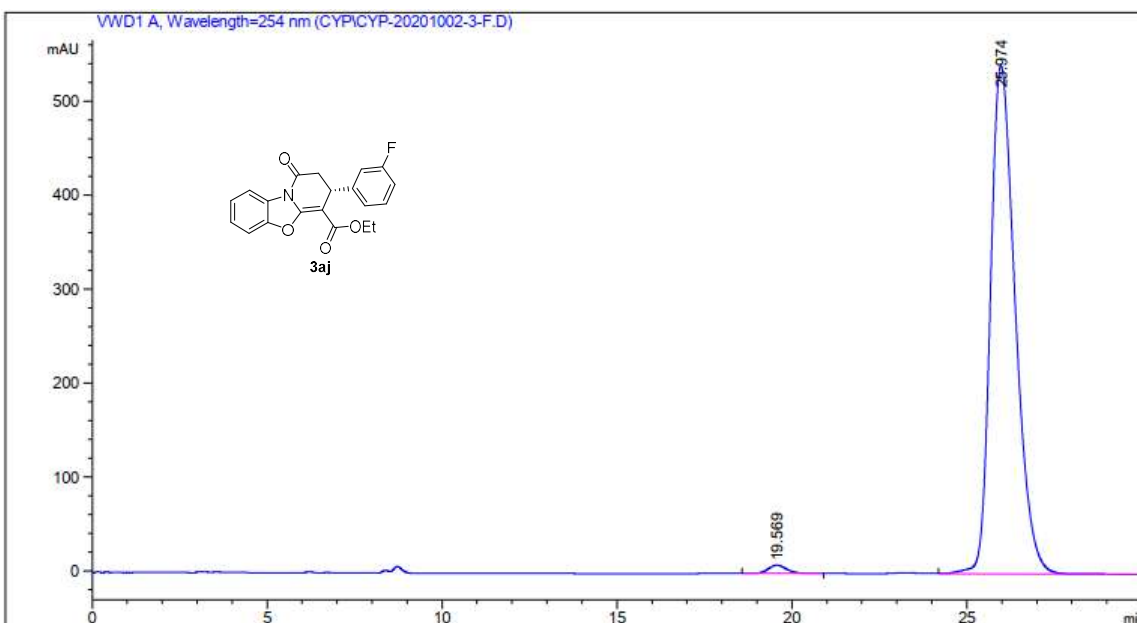

| Peak | Processed channel | Retention time (min) | Peak area (mAU*s) | Peak height (mAU) | Peak area (%) |
|------|-------------------|----------------------|-------------------|-------------------|---------------|
| 1    | PDA 254 nm        | 19.569               | 322.05923         | 8.86392           | 1.1975        |
| 2    | PDA 254 nm        | 25.974               | 2.65727e4         | 541.17535         | 98.8025       |

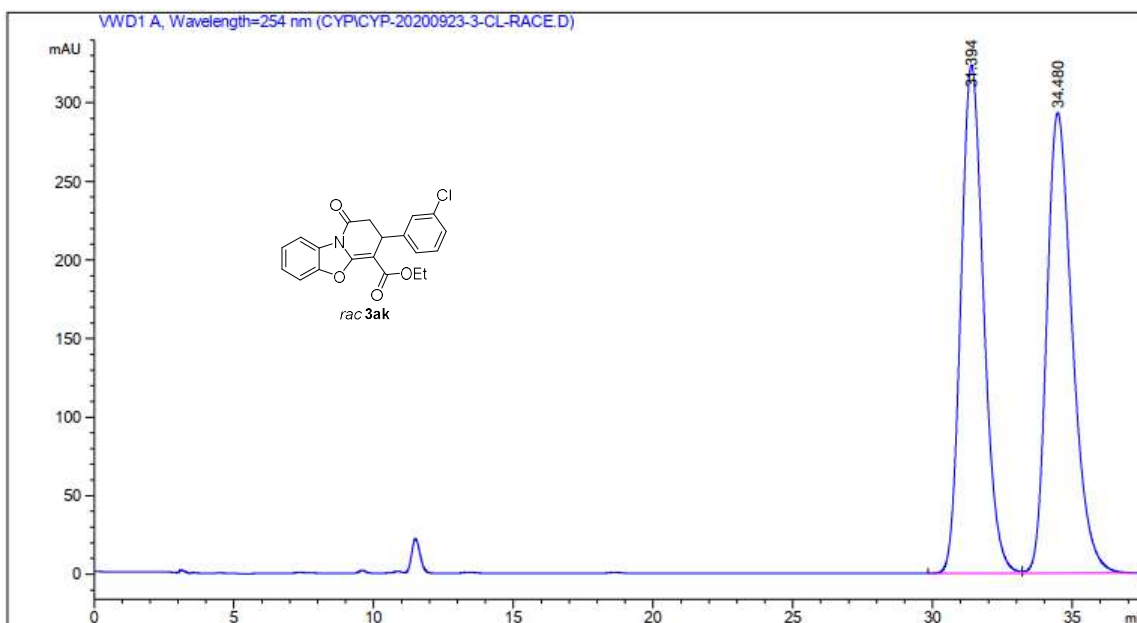

| Peak | Processed channel | Retention time (min) | Peak area (mAU*s) | Peak height (mAU) | Peak area (%) |
|------|-------------------|----------------------|-------------------|-------------------|---------------|
| 1    | PDA 254 nm        | 31.394               | 1.82139e4         | 323.17410         | 49.4973       |
| 2    | PDA 254 nm        | 34.480               | 1.85839e4         | 292.98035         | 50.5027       |

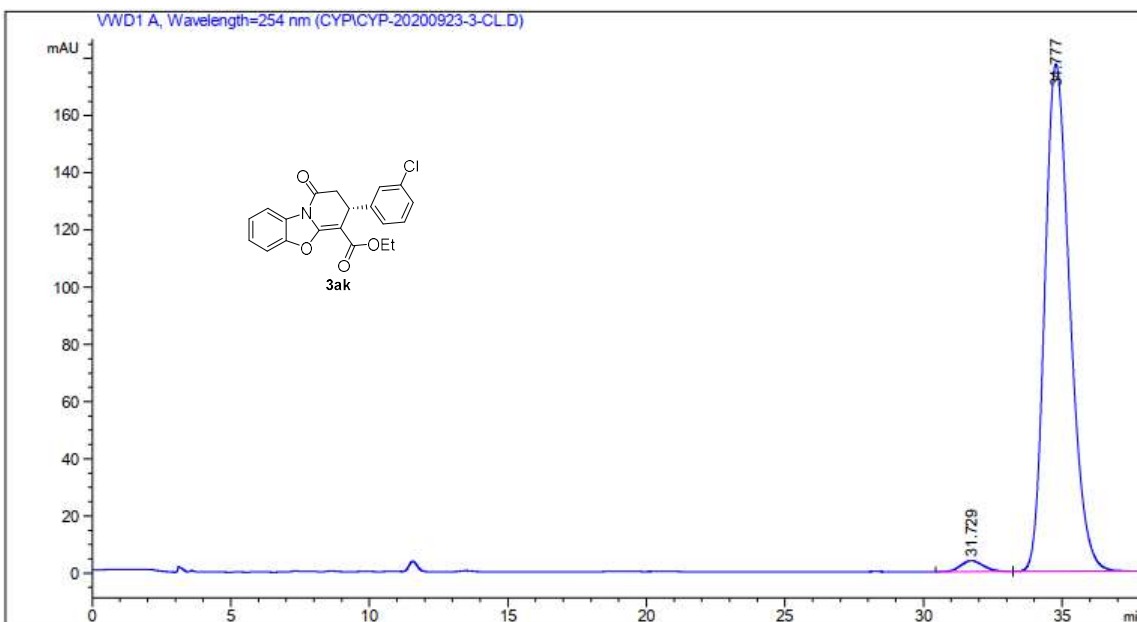

| Peak | Processed channel | Retention time (min) | Peak area (mAU*s) | Peak height (mAU) | Peak area (%) |
|------|-------------------|----------------------|-------------------|-------------------|---------------|
| 1    | PDA 254 nm        | 31.729               | 213.81346         | 3.80280           | 1.8831        |
| 2    | PDA 254 nm        | 34.777               | 1.11406e4         | 177.34804         | 98.1169       |



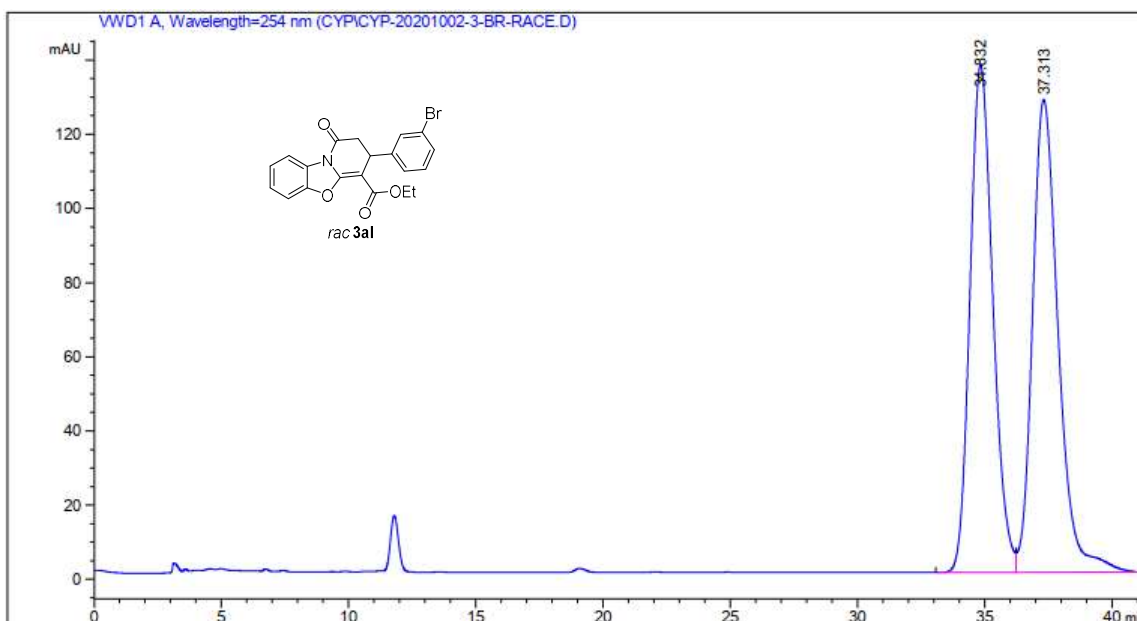

| Peak | Processed channel | Retention time (min) | Peak area (mAU*s) | Peak height (mAU) | Peak area (%) |
|------|-------------------|----------------------|-------------------|-------------------|---------------|
| 1    | PDA 254 nm        | 34.832               | 8534.80176        | 136.75325         | 48.8557       |
| 2    | PDA 254 nm        | 37.313               | 8934.60840        | 127.37474         | 51.1443       |

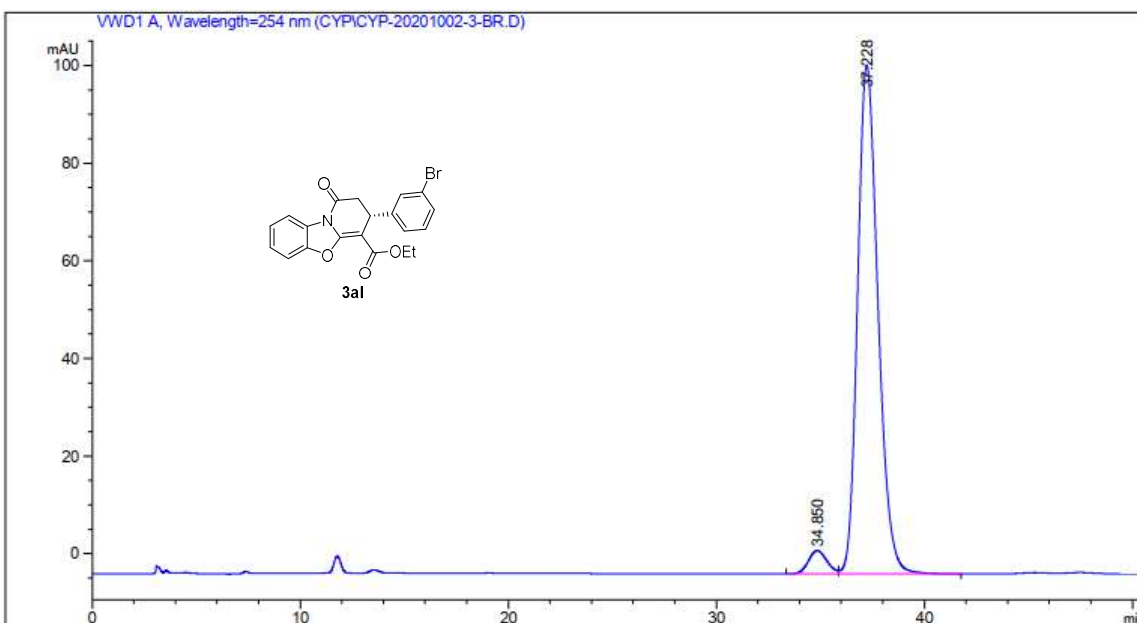

| Peak | Processed channel | Retention time (min) | Peak area (mAU*s) | Peak height (mAU) | Peak area (%) |
|------|-------------------|----------------------|-------------------|-------------------|---------------|
| 1    | PDA 254 nm        | 34.850               | 294.54367         | 4.75303           | 3.9918        |
| 2    | PDA 254 nm        | 37.228               | 7084.08838        | 104.19422         | 96.0082       |

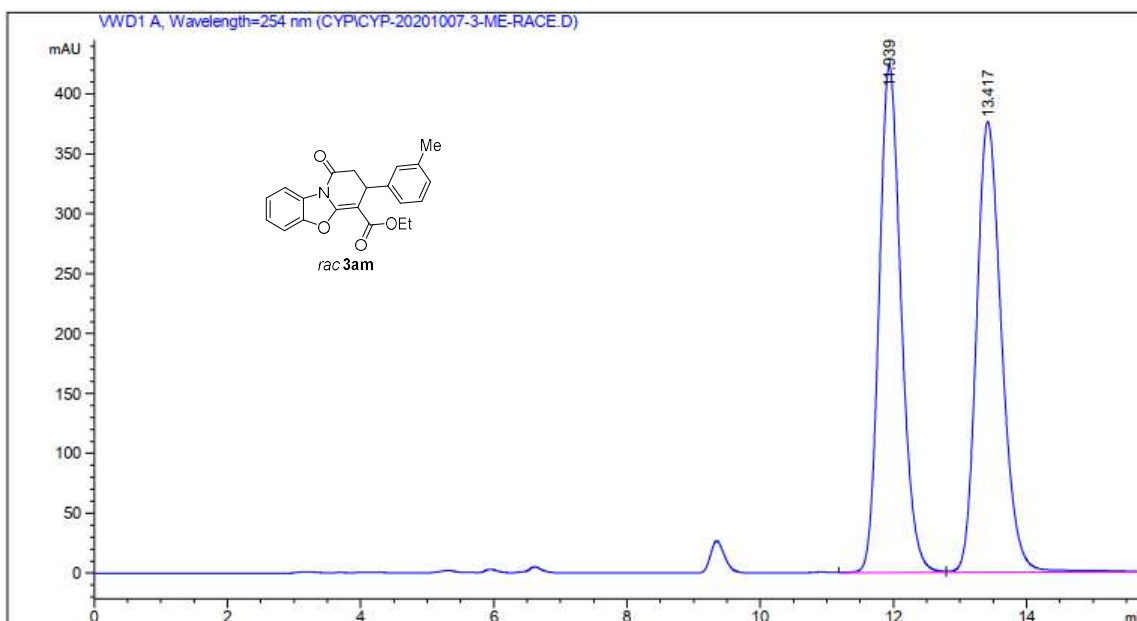

| Peak | Processed channel | Retention time (min) | Peak area (mAU*s) | Peak height (mAU) | Peak area (%) |
|------|-------------------|----------------------|-------------------|-------------------|---------------|
| 1    | PDA 254 nm        | 11.939               | 9734.37207        | 423.67487         | 49.6049       |
| 2    | PDA 254 nm        | 13.417               | 9889.45313        | 376.26837         | 50.3951       |

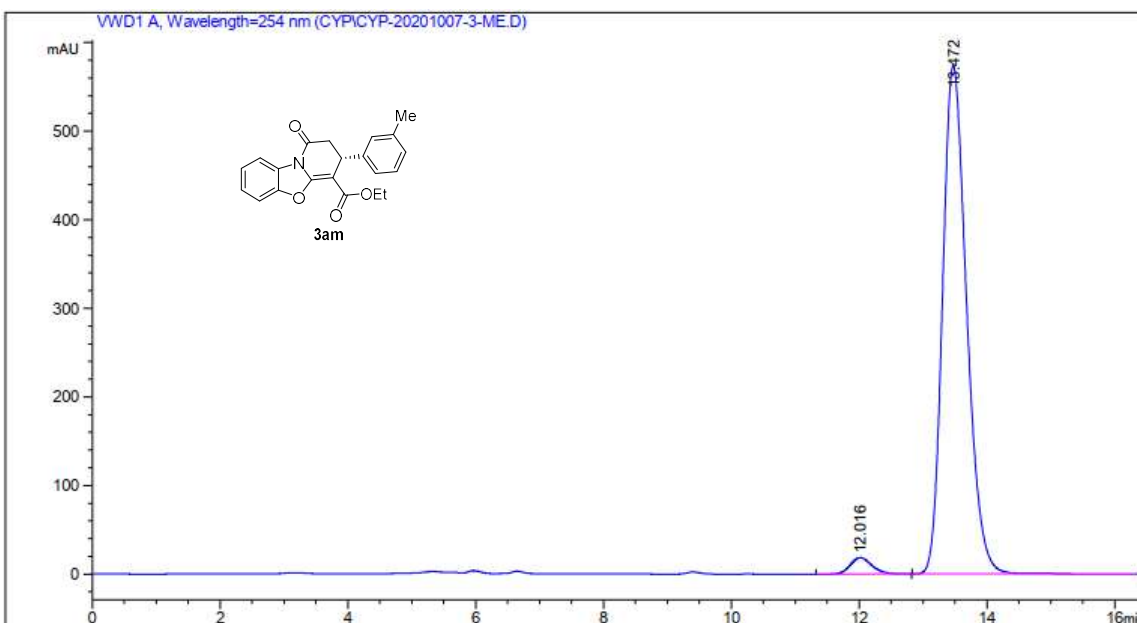

| Peak | Processed channel | Retention time (min) | Peak area (mAU*s) | Peak height (mAU) | Peak area (%) |
|------|-------------------|----------------------|-------------------|-------------------|---------------|
| 1    | PDA 254 nm        | 12.016               | 13.472            | 18.59833          | 2.8380        |
| 2    | PDA 254 nm        | 13.472               | 1.49559e4         | 574.23730         | 97.1620       |

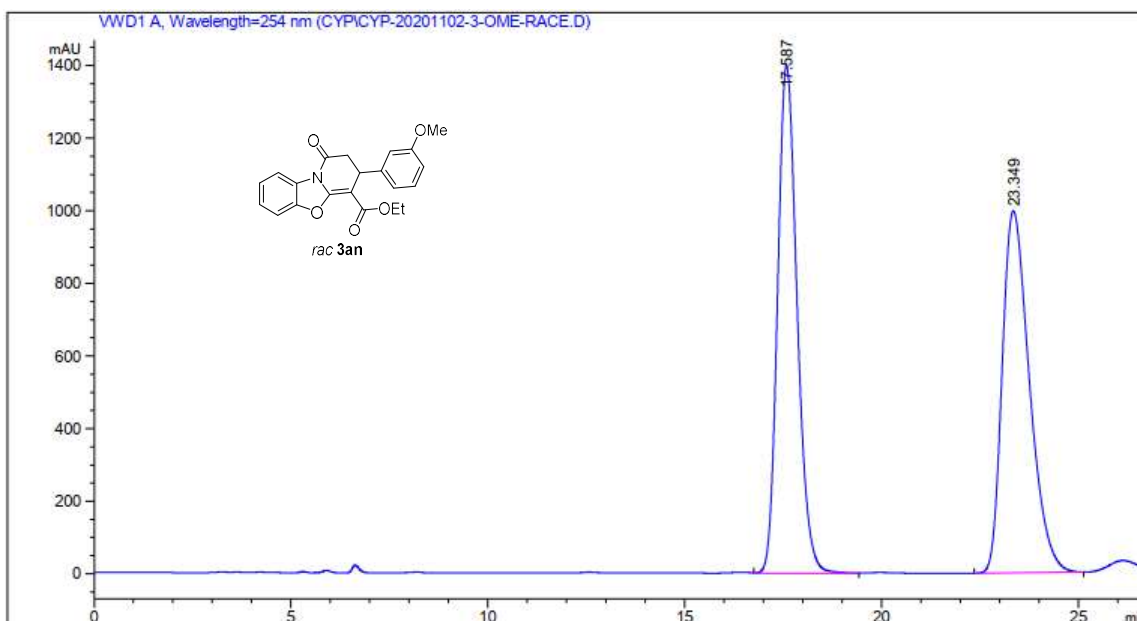

| Peak | Processed channel | Retention time (min) | Peak area (mAU*s) | Peak height (mAU) | Peak area (%) |
|------|-------------------|----------------------|-------------------|-------------------|---------------|
| 1    | PDA 254 nm        | 17.587               | 4.80201e4         | 1399.15771        | 50.1531       |
| 2    | PDA 254 nm        | 23.349               | 4.77269e4         | 996.96814         | 49.8469       |

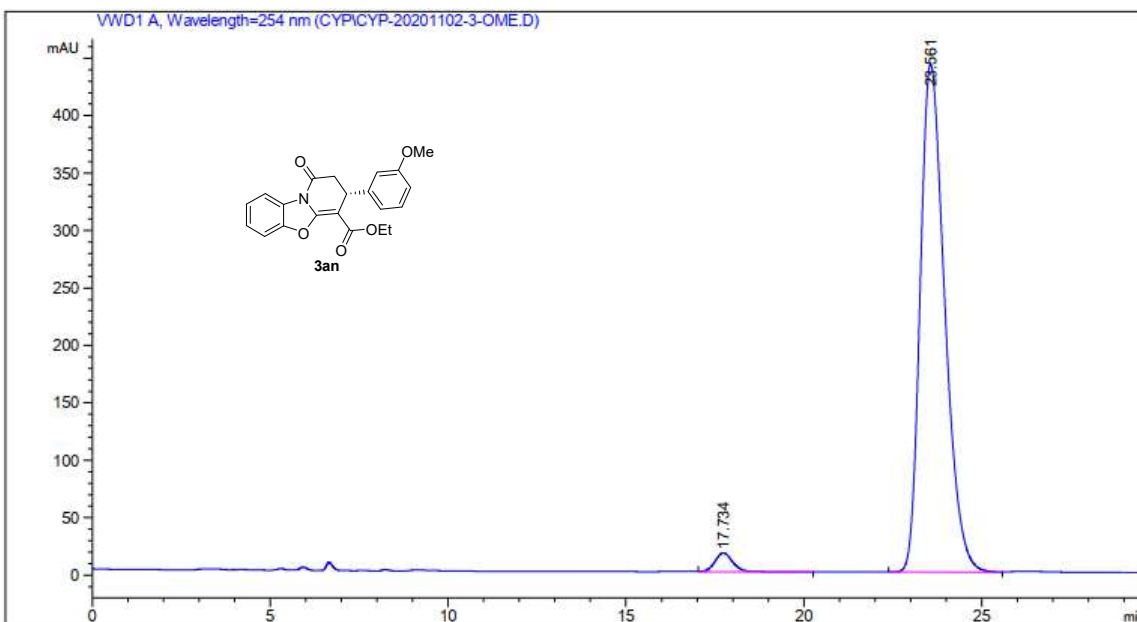

| Peak | Processed channel | Retention time (min) | Peak area (mAU*s) | Peak height (mAU) | Peak area (%) |
|------|-------------------|----------------------|-------------------|-------------------|---------------|
| 1    | PDA 254 nm        | 17.734               | 574.62067         | 16.35362          | 2.6517        |
| 2    | PDA 254 nm        | 23.561               | 2.10951e4         | 442.12653         | 97.3483       |

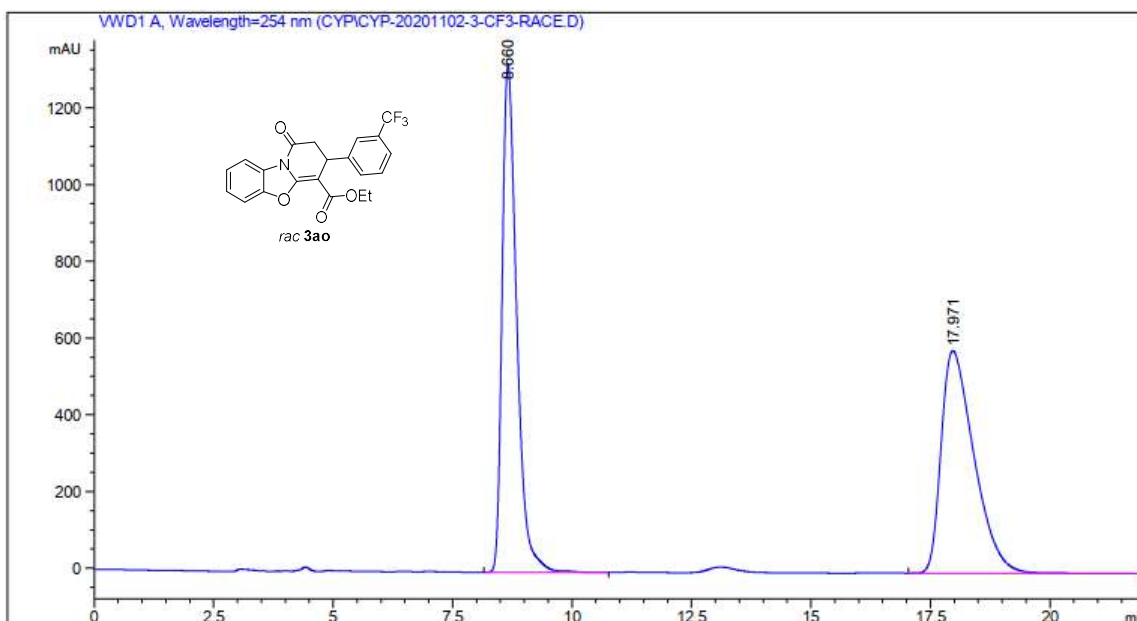

| Peak | Processed channel | Retention time (min) | Peak area (mAU*s) | Peak height (mAU) | Peak area (%) |
|------|-------------------|----------------------|-------------------|-------------------|---------------|
| 1    | PDA 254 nm        | 8.660                | 2.81966e4         | 1321.48926        | 50.4858       |
| 2    | PDA 254 nm        | 17.971               | 2.76539e4         | 579.52094         | 49.5142       |

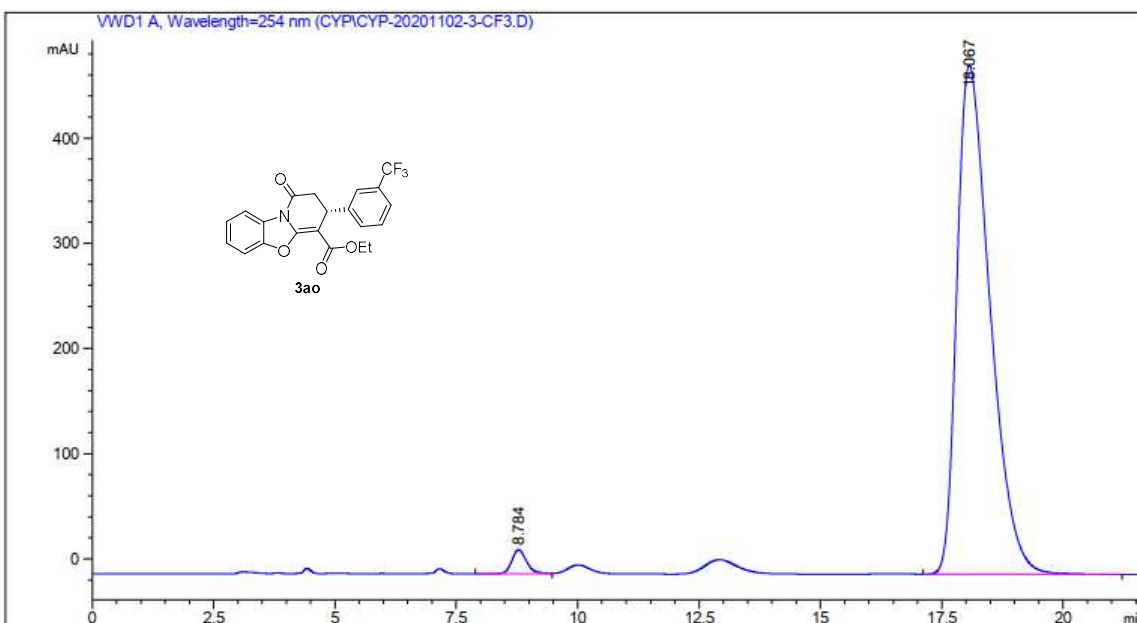

| Peak | Processed channel | Retention time (min) | Peak area (mAU*s) | Peak height (mAU) | Peak area (%) |
|------|-------------------|----------------------|-------------------|-------------------|---------------|
| 1    | PDA 254 nm        | 8.784                | 494.93884         | 22.96216          | 2.1184        |
| 2    | PDA 254 nm        | 18.067               | 2.28693e4         | 483.76169         | 97.8816       |

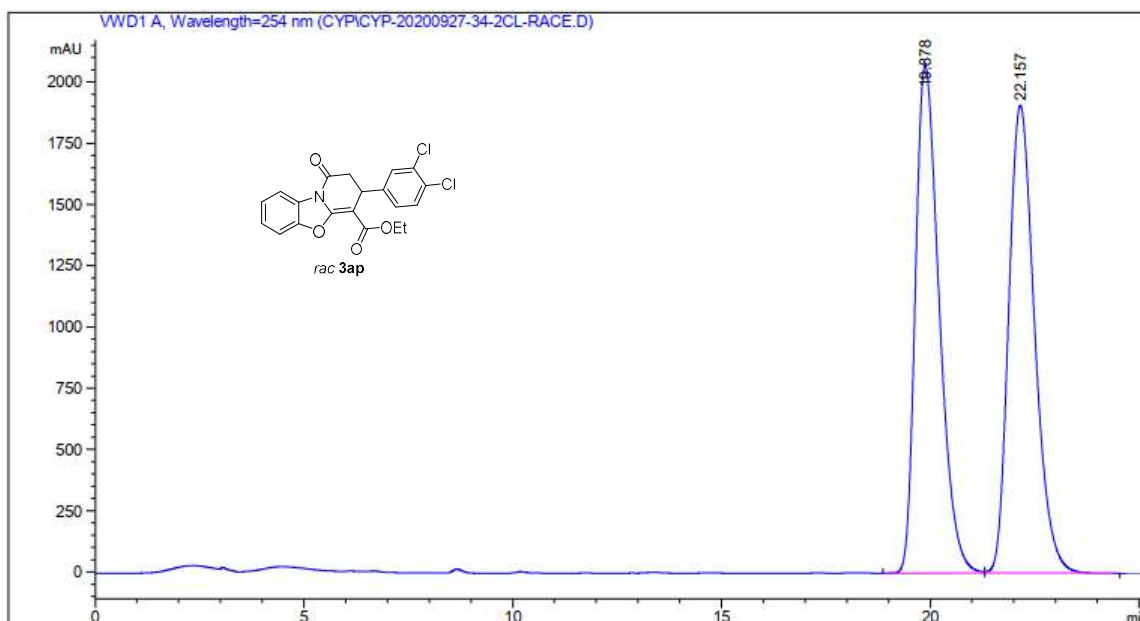

| Peak | Processed channel | Retention time (min) | Peak area (mAU*s) | Peak height (mAU) | Peak area (%) |
|------|-------------------|----------------------|-------------------|-------------------|---------------|
| 1    | PDA 254 nm        | 19.878               | 8.19358e4         | 2072.93896        | 49.9404       |
| 2    | PDA 254 nm        | 22.157               | 8.21314e4         | 1908.70337        | 50.0596       |

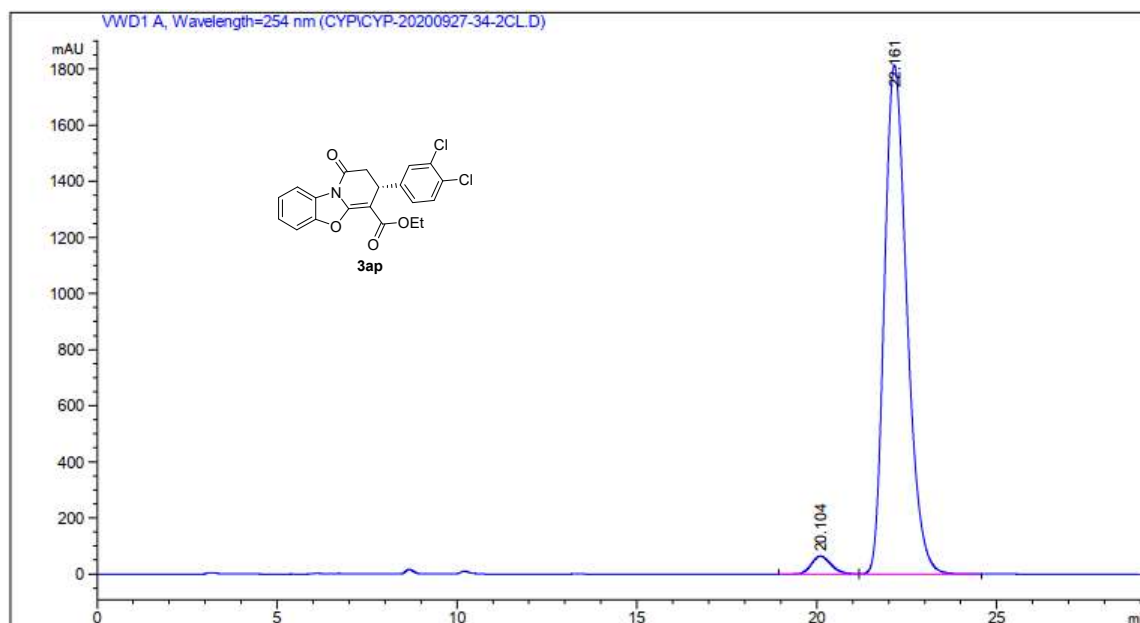

| Peak | Processed channel | Retention time (min) | Peak area (mAU*s) | Peak height (mAU) | Peak area (%) |
|------|-------------------|----------------------|-------------------|-------------------|---------------|
| 1    | PDA 254 nm        | 20.104               | 2454.66309        | 64.05537          | 3.0303        |
| 2    | PDA 254 nm        | 22.161               | 7.85492e4         | 1813.76245        | 96.9697       |

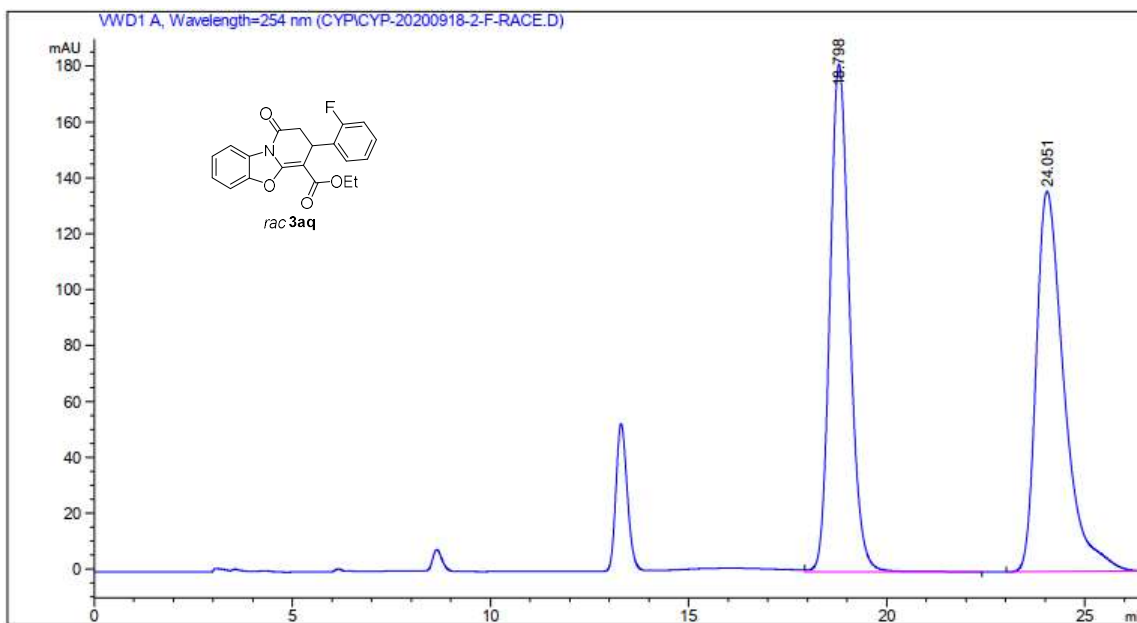

| Peak | Processed channel | Retention time (min) | Peak area (mAU*s) | Peak height (mAU) | Peak area (%) |
|------|-------------------|----------------------|-------------------|-------------------|---------------|
| 1    | PDA 254 nm        | 18.798               | 6210.68945        | 181.61726         | 48.3556       |
| 2    | PDA 254 nm        | 24.051               | 6633.10059        | 136.13461         | 51.6444       |

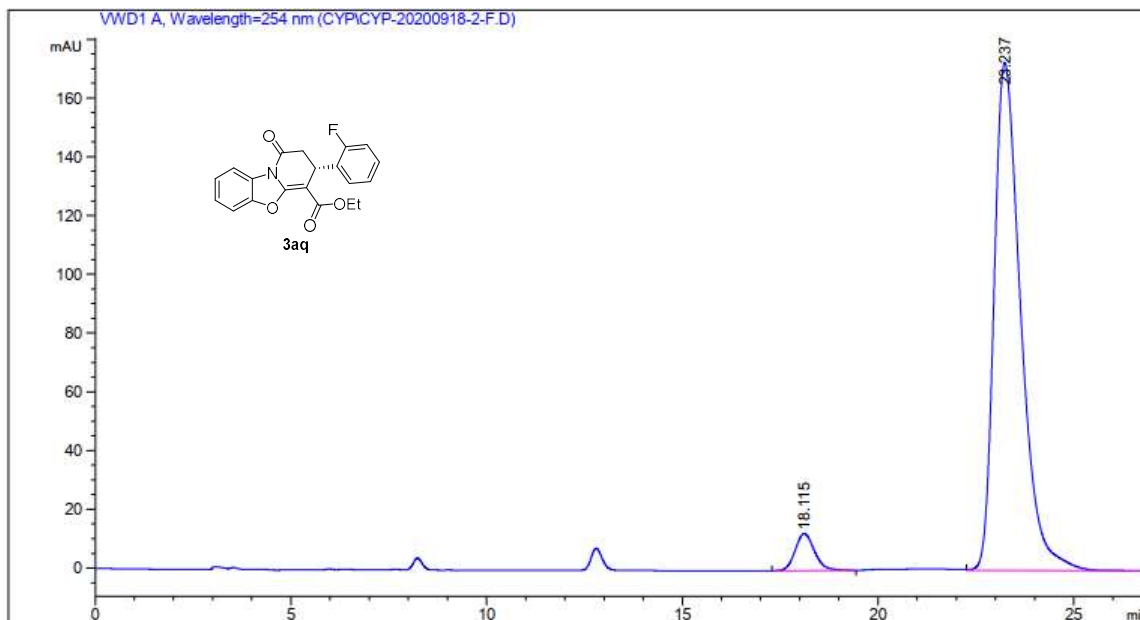

| Peak | Processed channel | Retention time (min) | Peak area (mAU*s) | Peak height (mAU) | Peak area (%) |
|------|-------------------|----------------------|-------------------|-------------------|---------------|
| 1    | PDA 254 nm        | 18.115               | 428.78979         | 12.53407          | 4.9977        |
| 2    | PDA 254 nm        | 23.237               | 8150.96436        | 172.83597         | 95.0023       |

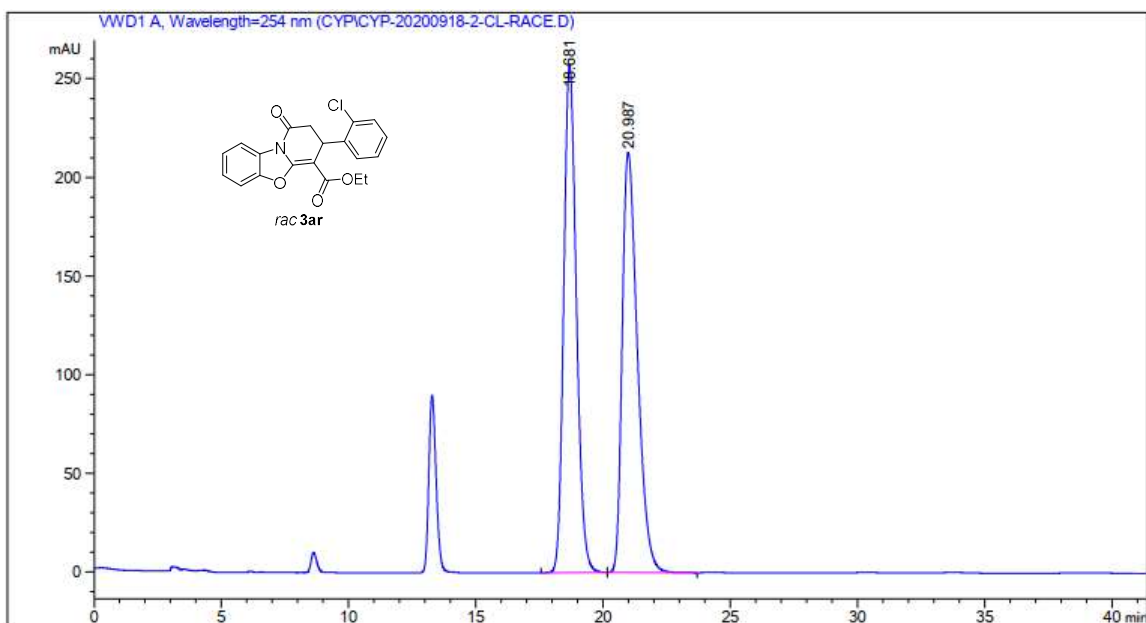

| Peak | Processed channel | Retention time (min) | Peak area (mAU*s) | Peak height (mAU) | Peak area (%) |
|------|-------------------|----------------------|-------------------|-------------------|---------------|
| 1    | PDA 254 nm        | 18.681               | 8857.02832        | 257.15665         | 50.0824       |
| 2    | PDA 254 nm        | 20.987               | 8827.87598        | 212.83907         | 49.9176       |

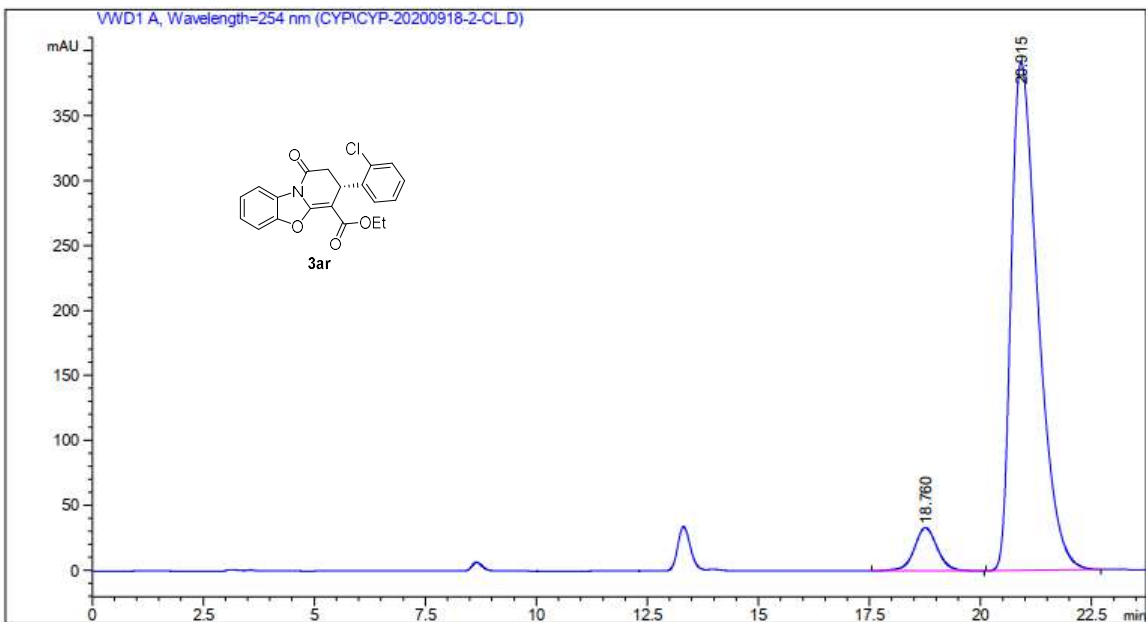

| Peak | Processed channel | Retention time (min) | Peak area (mAU*s) | Peak height (mAU) | Peak area (%) |
|------|-------------------|----------------------|-------------------|-------------------|---------------|
| 1    | PDA 254 nm        | 18.760               | 1197.54041        | 33.24203          | 6.8114        |
| 2    | PDA 254 nm        | 20.915               | 1.63838e4         | 391.17218         | 93.1886       |

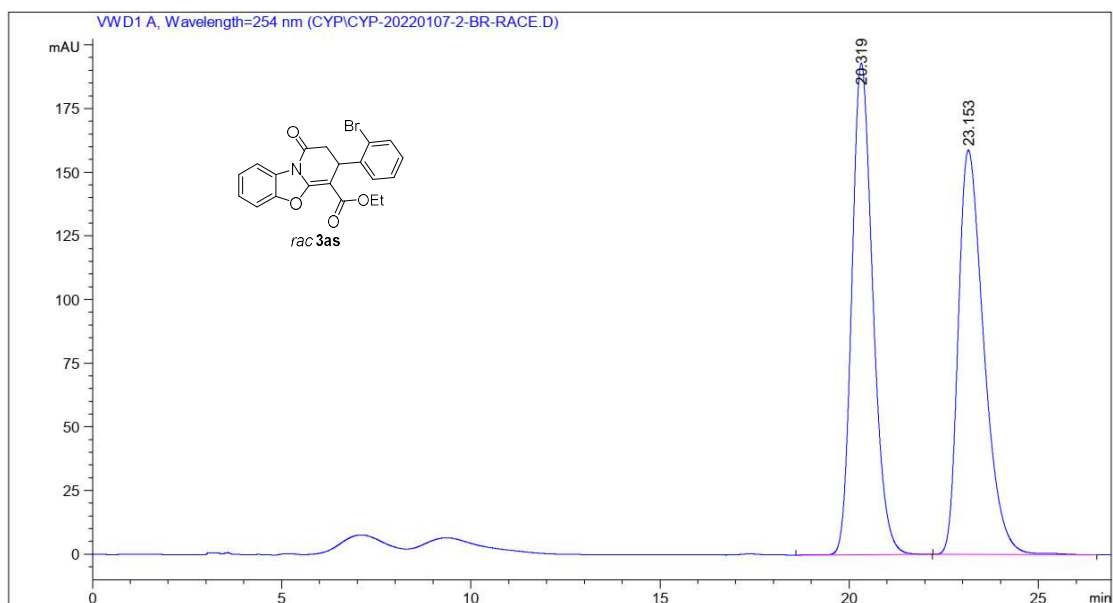

| Peak | Processed channel | Retention time (min) | Peak area (mAU*s) | Peak height (mAU) | Peak area (%) |
|------|-------------------|----------------------|-------------------|-------------------|---------------|
| 1    | PDA 254 nm        | 20.319               | 7423.76904        | 192.92757         | 49.8925       |
| 2    | PDA 254 nm        | 23.153               | 7455.76660        | 158.71455         | 50.1075       |

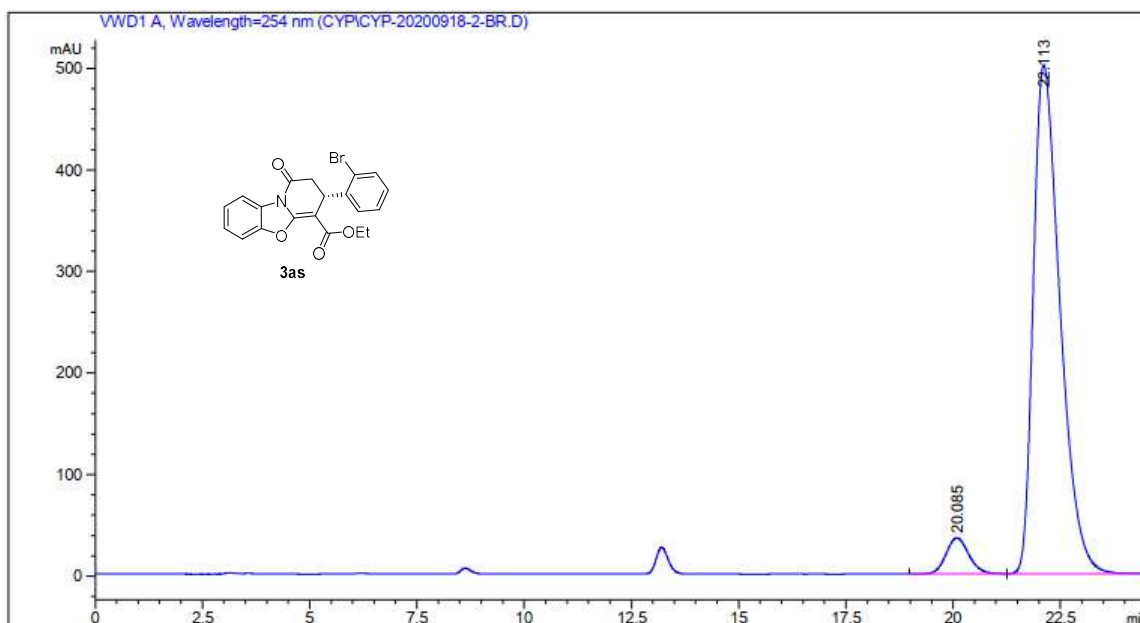

| Peak | Processed channel | Retention time (min) | Peak area (mAU*s) | Peak height (mAU) | Peak area (%) |
|------|-------------------|----------------------|-------------------|-------------------|---------------|
| 1    | PDA 254 nm        | 20.085               | 1318.06262        | 35.47941          | 5.7350        |
| 2    | PDA 254 nm        | 22.113               | 2.16646e4         | 500.70096         | 94.2650       |



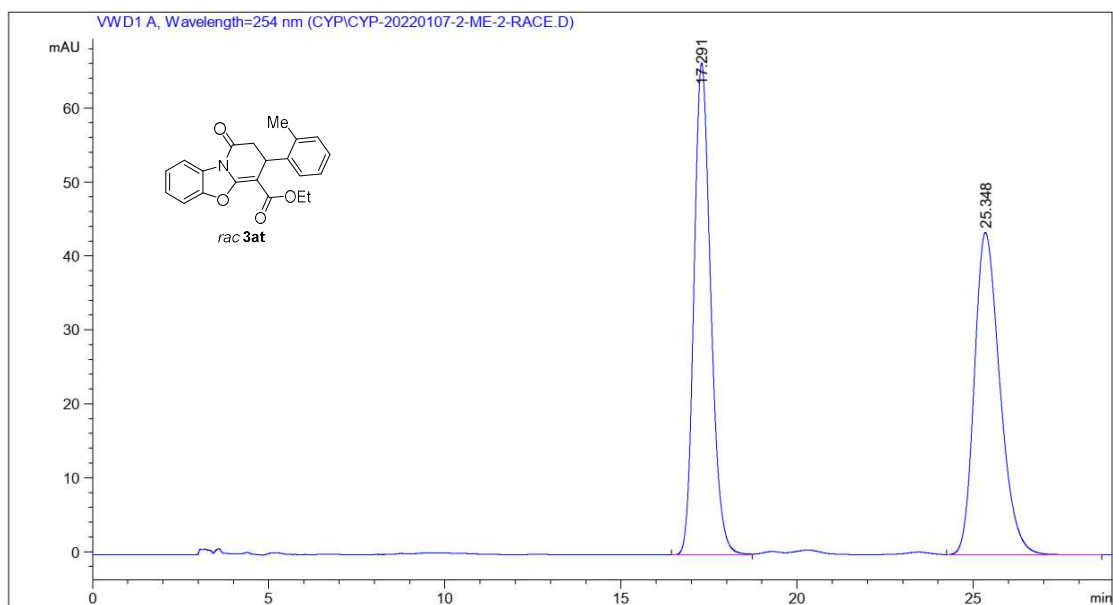

| Peak | Processed channel | Retention time (min) | Peak area (mAU*s) | Peak height (mAU) | Peak area (%) |
|------|-------------------|----------------------|-------------------|-------------------|---------------|
| 1    | PDA 254 nm        | 17.291               | 2197.80396        | 66.47492          | 50.0454       |
| 2    | PDA 254 nm        | 25.348               | 2193.81958        | 43.55183          | 49.9546       |

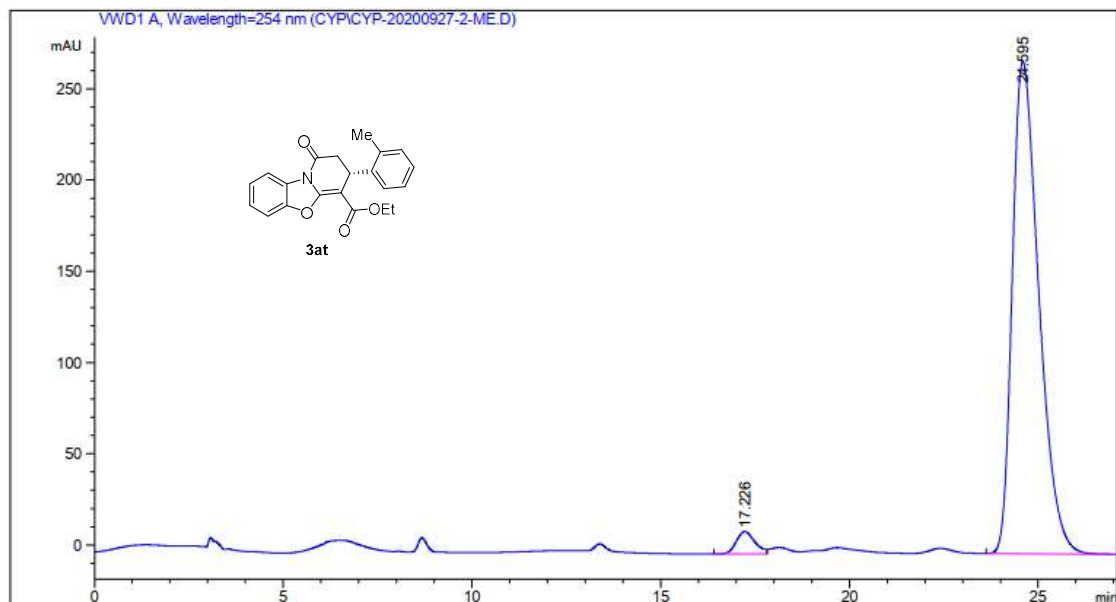

| Peak | Processed channel | Retention time (min) | Peak area (mAU*s) | Peak height (mAU) | Peak area (%) |
|------|-------------------|----------------------|-------------------|-------------------|---------------|
| 1    | PDA 254 nm        | 17.226               | 420.98737         | 12.21804          | 3.1024        |
| 2    | PDA 254 nm        | 24.595               | 1.31488e4         | 269.83951         | 96.8976       |

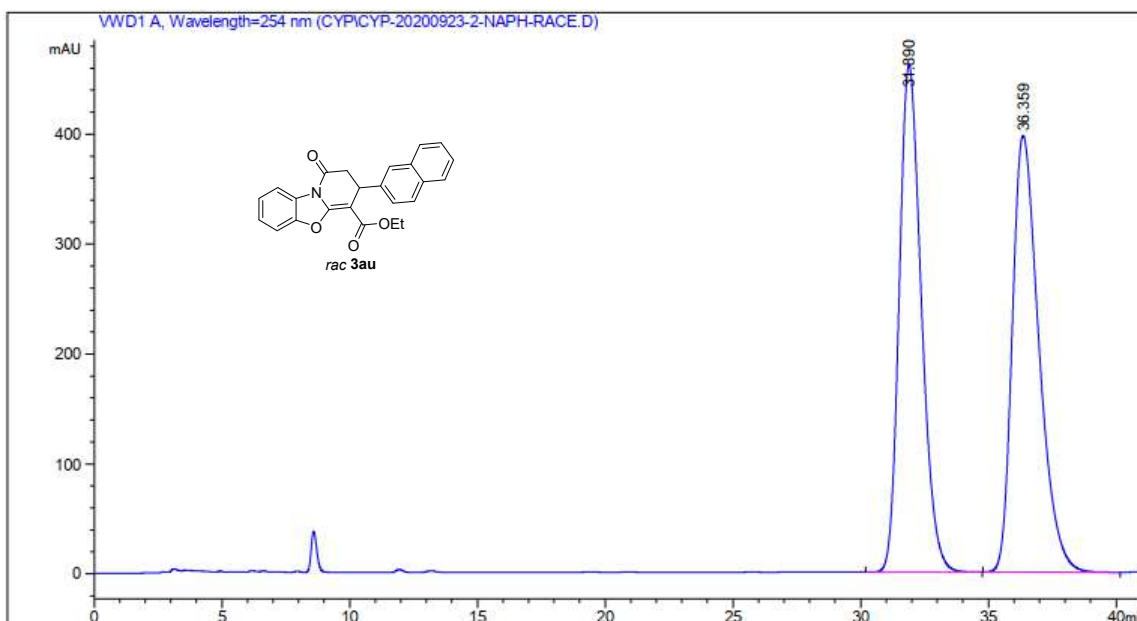

| Peak | Processed channel | Retention time (min) | Peak area (mAU*s) | Peak height (mAU) | Peak area (%) |
|------|-------------------|----------------------|-------------------|-------------------|---------------|
| 1    | PDA 254 nm        | 31.890               | 2.77064e4         | 461.09982         | 49.1039       |
| 2    | PDA 254 nm        | 36.359               | 2.87177e4         | 397.02863         | 50.8961       |

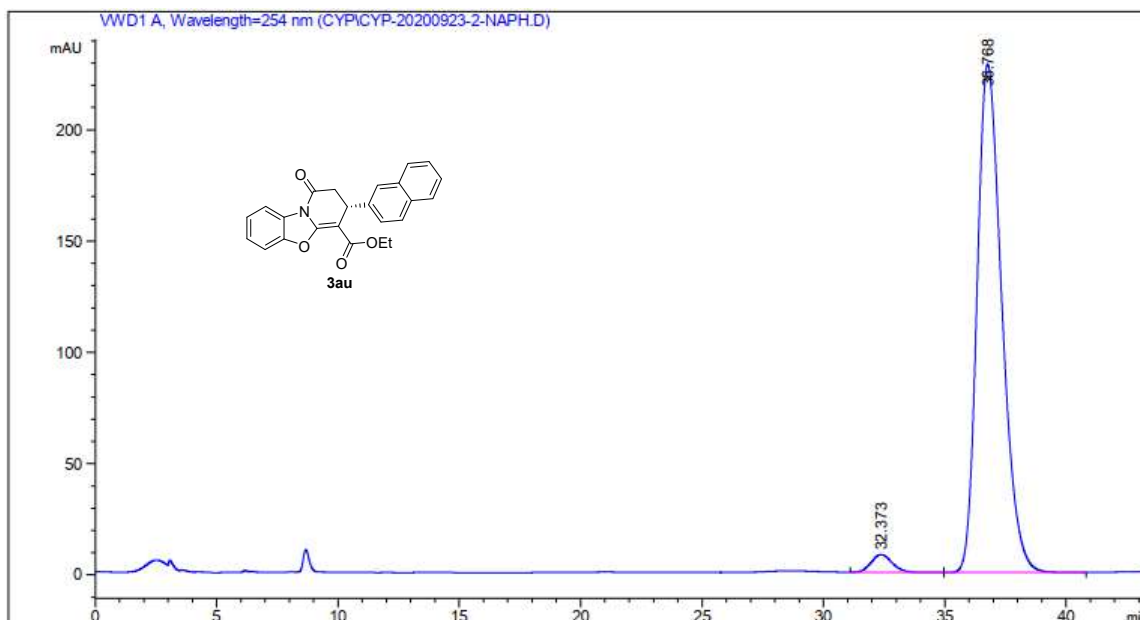

| Peak | Processed channel | Retention time (min) | Peak area (mAU*s) | Peak height (mAU) | Peak area (%) |
|------|-------------------|----------------------|-------------------|-------------------|---------------|
| 1    | PDA 254 nm        | 32.373               | 495.29422         | 8.04953           | 2.9803        |
| 2    | PDA 254 nm        | 36.768               | 1.61237e4         | 228.39937         | 97.0197       |

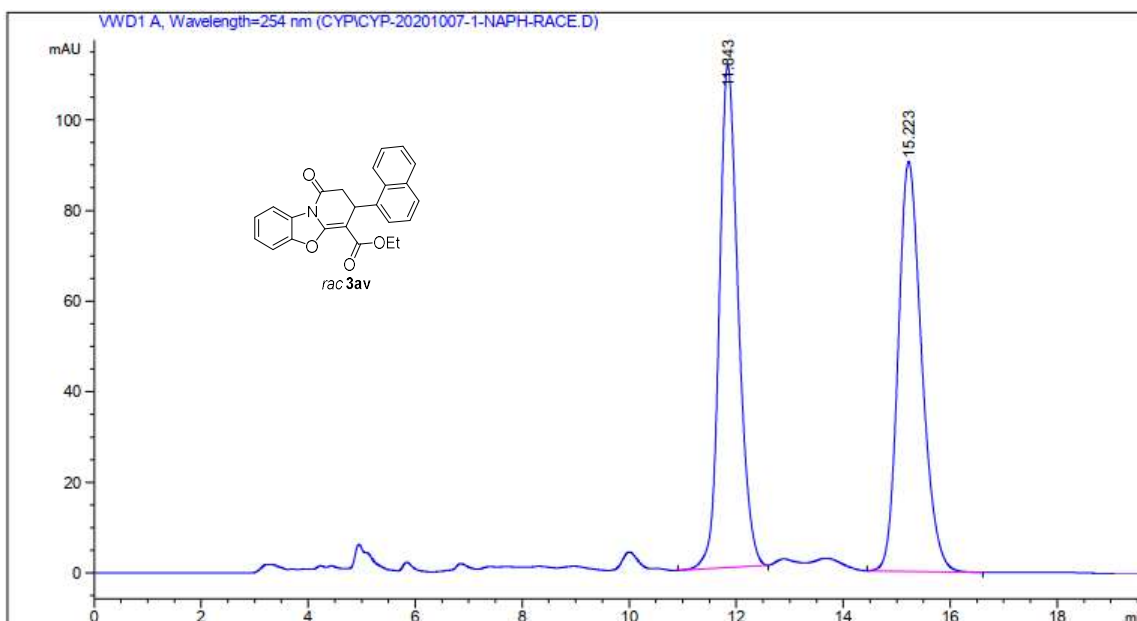

| Peak | Processed channel | Retention time (min) | Peak area (mAU*s) | Peak height (mAU) | Peak area (%) |
|------|-------------------|----------------------|-------------------|-------------------|---------------|
| 1    | PDA 254 nm        | 11.843               | 2731.97729        | 110.86541         | 49.7350       |
| 2    | PDA 254 nm        | 15.223               | 2761.08813        | 90.40737          | 50.2650       |

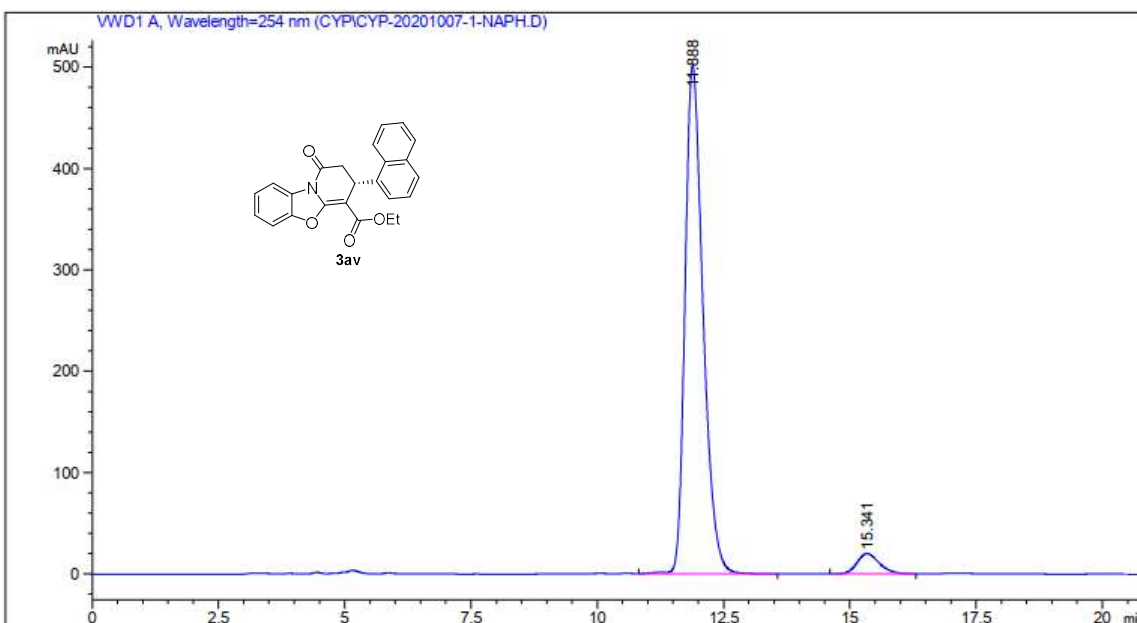

| Peak | Processed channel | Retention time (min) | Peak area (mAU*s) | Peak height (mAU) | Peak area (%) |
|------|-------------------|----------------------|-------------------|-------------------|---------------|
| 1    | PDA 254 nm        | 11.888               | 1.24159e4         | 501.91385         | 95.3342       |
| 2    | PDA 254 nm        | 15.341               | 607.65381         | 19.87039          | 4.6658        |

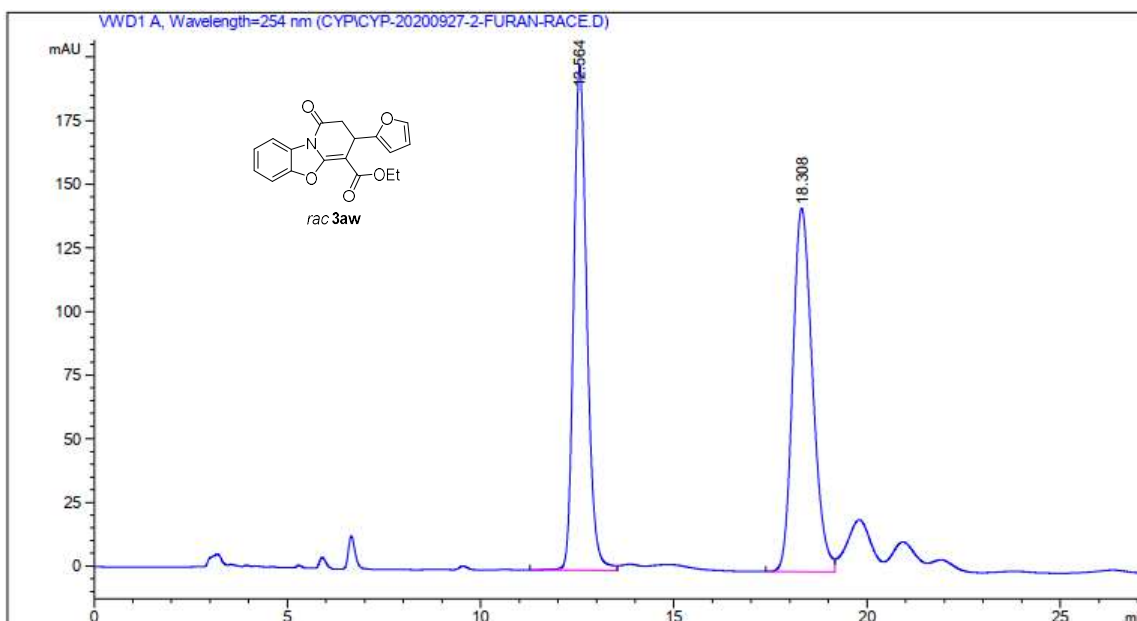

| Peak | Processed channel | Retention time (min) | Peak area (mAU*s) | Peak height (mAU) | Peak area (%) |
|------|-------------------|----------------------|-------------------|-------------------|---------------|
| 1    | PDA 254 nm        | 12.564               | 4712.59131        | 198.38712         | 48.1794       |
| 2    | PDA 254 nm        | 18.308               | 5068.74365        | 142.74486         | 51.8206       |

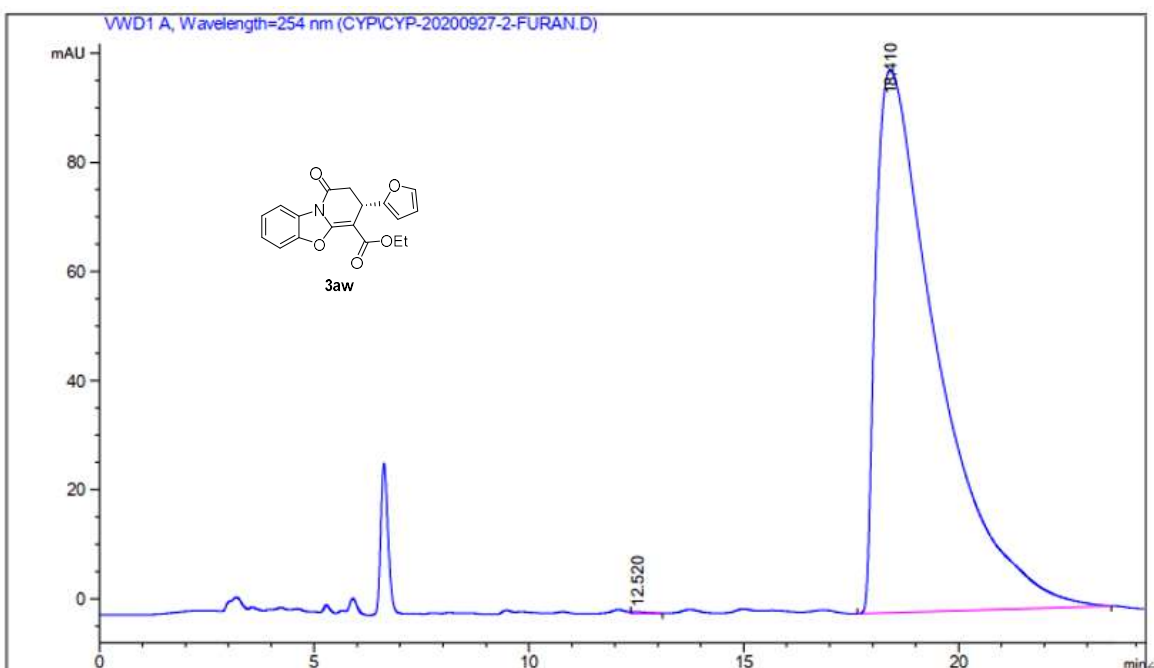

| Peak | Processed channel | Retention time (min) | Peak area (mAU*s) | Peak height (mAU) | Peak area (%) |
|------|-------------------|----------------------|-------------------|-------------------|---------------|
| 1    | PDA 254 nm        | 12.520               | 7.34631           | 3.05625e-1        | 0.0737        |
| 2    | PDA 254 nm        | 18.410               | 9958.29199        | 99.44231          | 99.9263       |

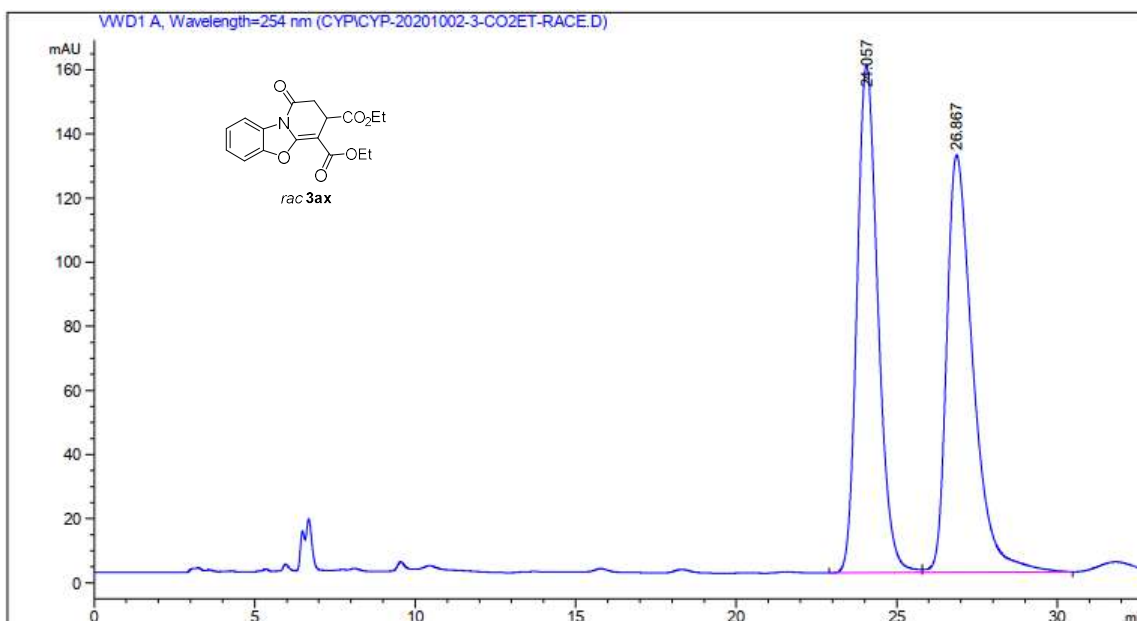

| Peak | Processed channel | Retention time (min) | Peak area (mAU*s) | Peak height (mAU) | Peak area (%) |
|------|-------------------|----------------------|-------------------|-------------------|---------------|
| 1    | PDA 254 nm        | 24.057               | 7163.41211        | 158.32468         | 49.1490       |
| 2    | PDA 254 nm        | 26.867               | 7411.48975        | 130.13586         | 50.8510       |

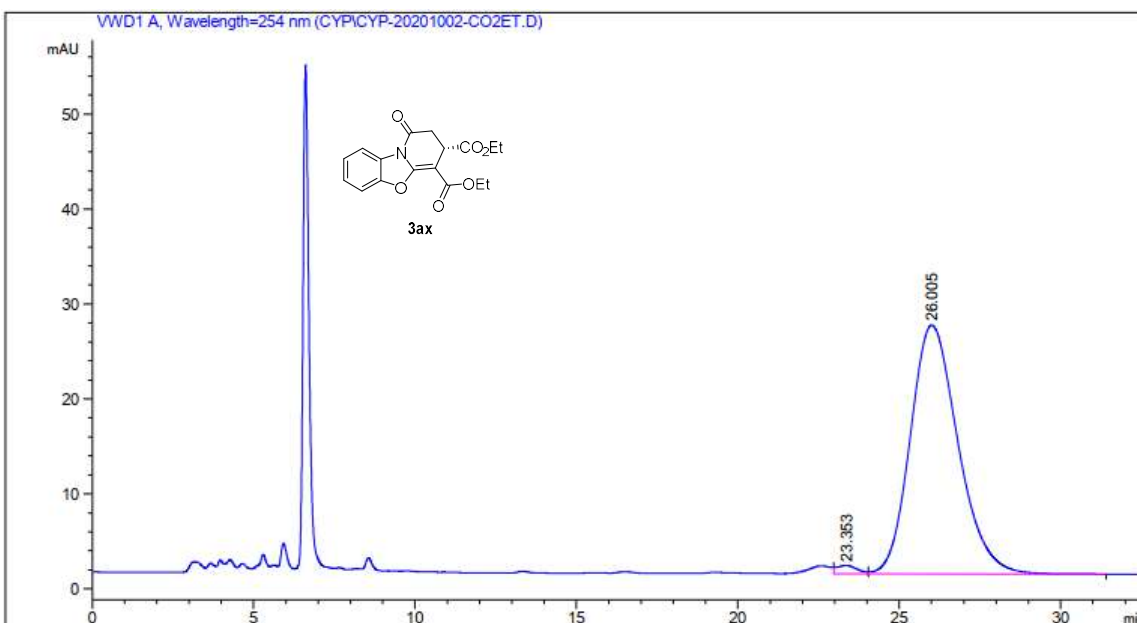

| Peak | Processed channel | Retention time (min) | Peak area (mAU*s) | Peak height (mAU) | Peak area (%) |
|------|-------------------|----------------------|-------------------|-------------------|---------------|
| 1    | PDA 254 nm        | 23.353               | 37.62748          | 8.55551e-1        | 1.3821        |
| 2    | PDA 254 nm        | 26.005               | 2684.76904        | 26.18994          | 98.6179       |

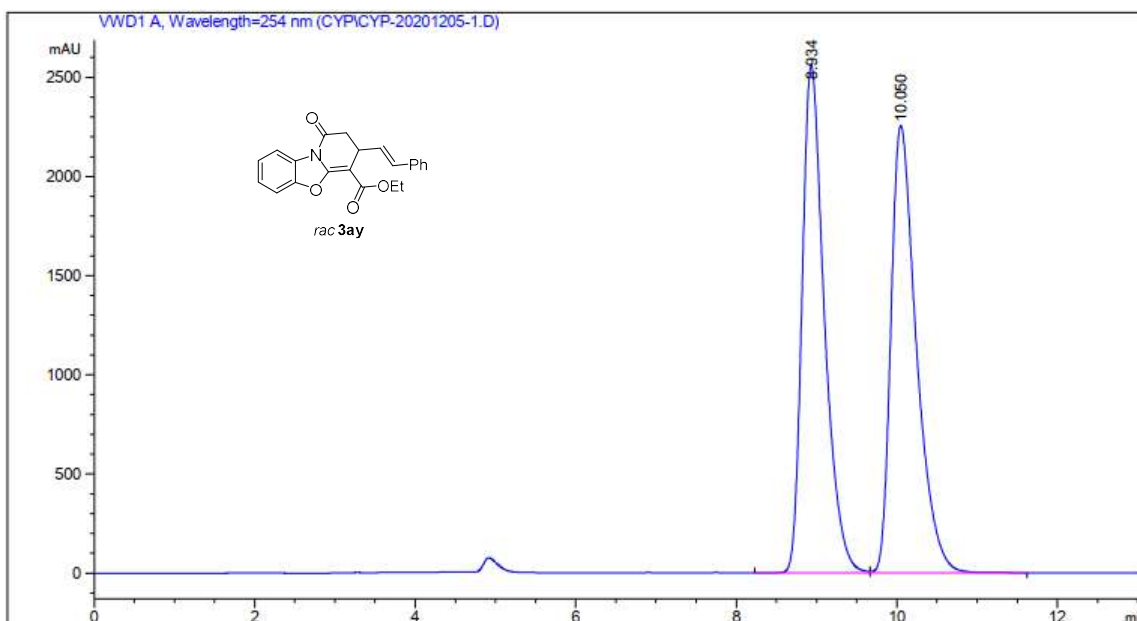

| Peak | Processed channel | Retention time (min) | Peak area (mAU*s) | Peak height (mAU) | Peak area (%) |
|------|-------------------|----------------------|-------------------|-------------------|---------------|
| 1    | PDA 254 nm        | 8.934                | 4.93643e4         | 2560.53491        | 49.8312       |
| 2    | PDA 254 nm        | 10.050               | 4.96987e4         | 2255.93921        | 50.1688       |

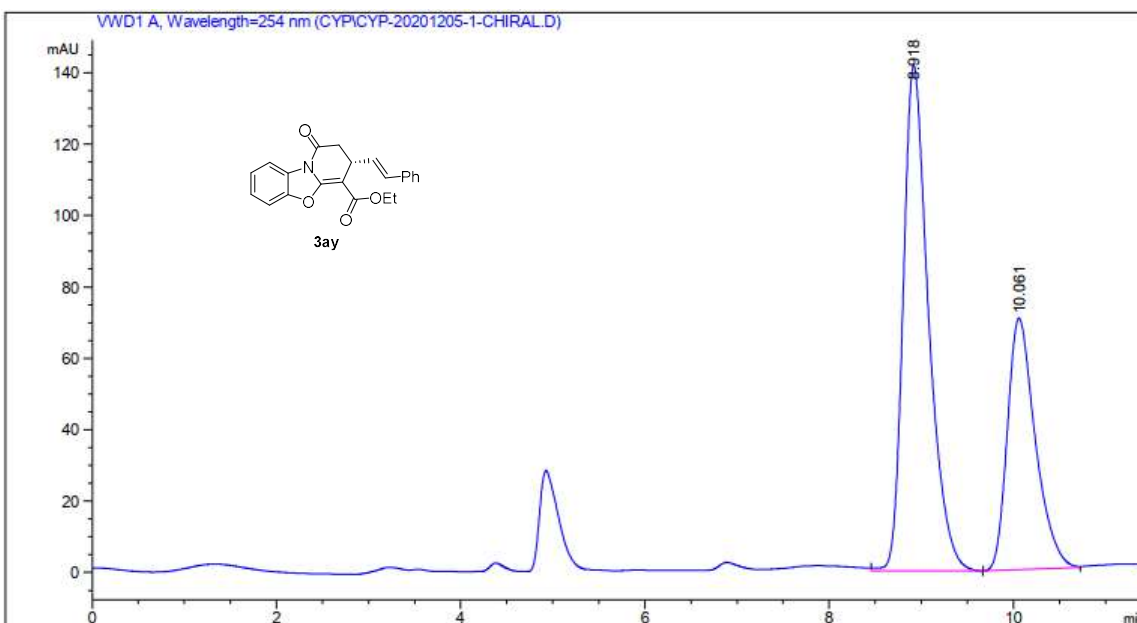

| Peak | Processed channel | Retention time (min) | Peak area (mAU*s) | Peak height (mAU) | Peak area (%) |
|------|-------------------|----------------------|-------------------|-------------------|---------------|
| 1    | PDA 254 nm        | 8.918                | 2703.38940        | 141.62585         | 64.5941       |
| 2    | PDA 254 nm        | 10.061               | 1481.80640        | 70.41842          | 35.4059       |

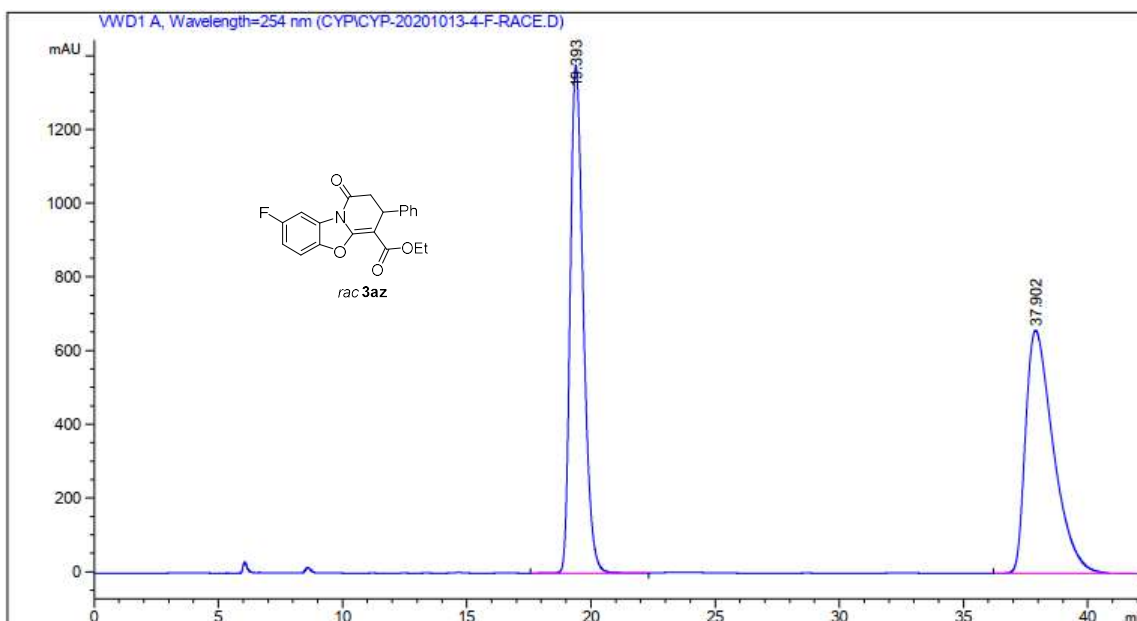

| Peak | Processed channel | Retention time (min) | Peak area (mAU*s) | Peak height (mAU) | Peak area (%) |
|------|-------------------|----------------------|-------------------|-------------------|---------------|
| 1    | PDA 254 nm        | 19.393               | 5.03981e4         | 1377.88489        | 49.7118       |
| 2    | PDA 254 nm        | 37.902               | 5.09824e4         | 658.36438         | 50.2882       |

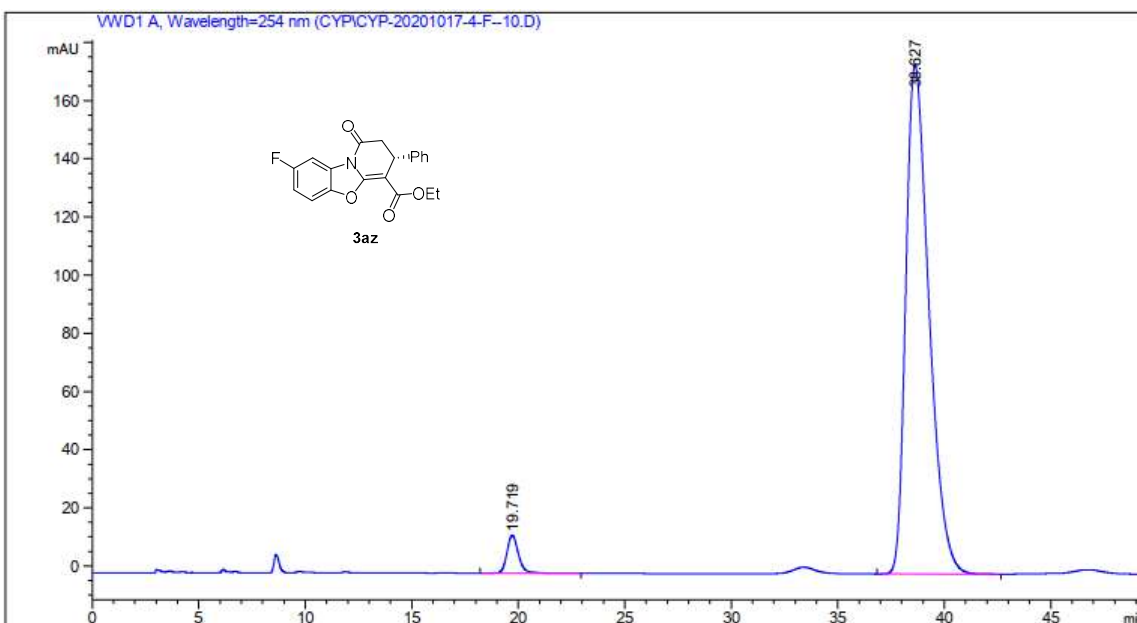

| Peak | Processed channel | Retention time (min) | Peak area (mAU*s) | Peak height (mAU) | Peak area (%) |
|------|-------------------|----------------------|-------------------|-------------------|---------------|
| 1    | PDA 254 nm        | 19.719               | 494.99469         | 13.07365          | 3.6247        |
| 2    | PDA 254 nm        | 38.627               | 1.31610e4         | 174.86995         | 96.3753       |

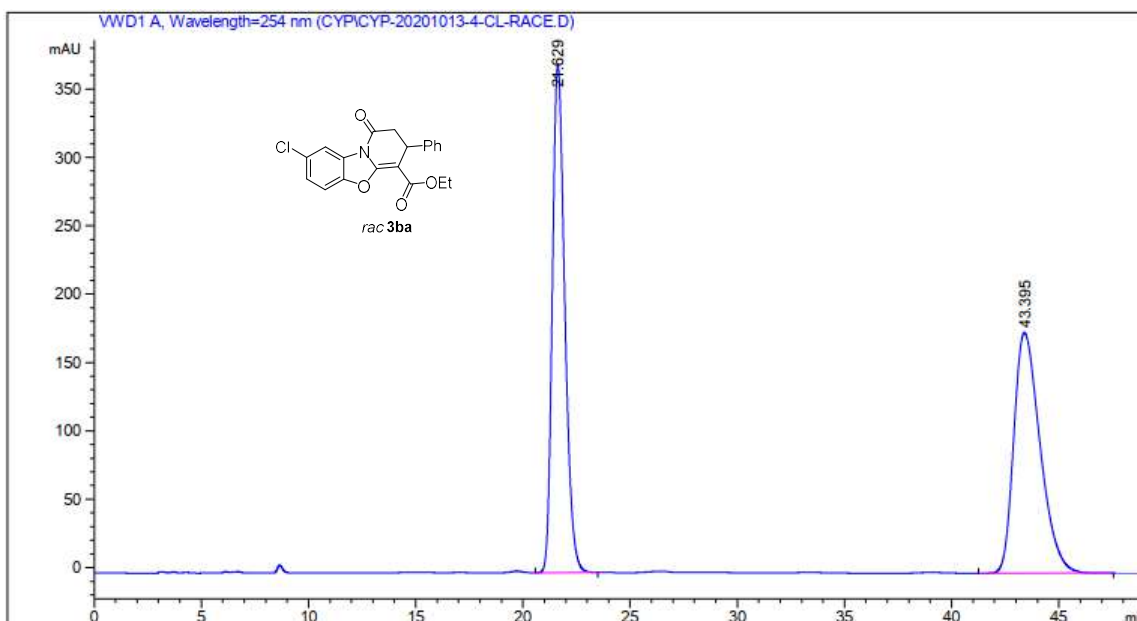

| Peak | Processed channel | Retention time (min) | Peak area (mAU*s) | Peak height (mAU) | Peak area (%) |
|------|-------------------|----------------------|-------------------|-------------------|---------------|
| 1    | PDA 254 nm        | 21.629               | 1.49572e4         | 371.03976         | 49.9263       |
| 2    | PDA 254 nm        | 43.395               | 1.50013e4         | 175.90756         | 50.0737       |

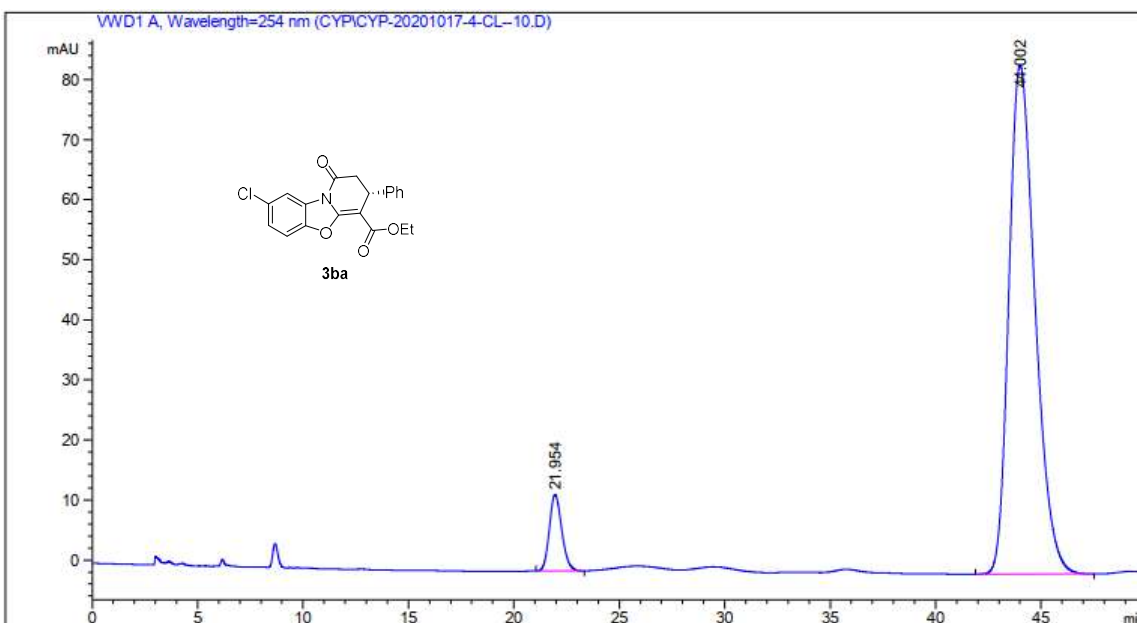

| Peak | Processed channel | Retention time (min) | Peak area (mAU*s) | Peak height (mAU) | Peak area (%) |
|------|-------------------|----------------------|-------------------|-------------------|---------------|
| 1    | PDA 254 nm        | 21.954               | 520.87646         | 12.72081          | 6.6684        |
| 2    | PDA 254 nm        | 44.002               | 7290.29053        | 84.69585          | 93.3316       |



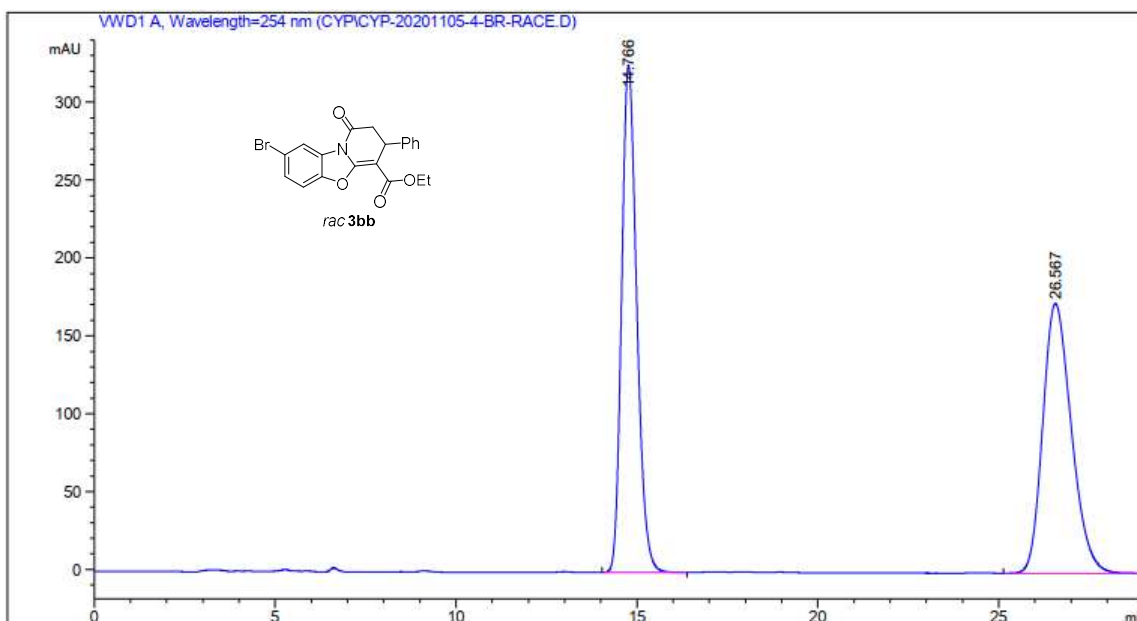

| Peak | Processed channel | Retention time (min) | Peak area (mAU*s) | Peak height (mAU) | Peak area (%) |
|------|-------------------|----------------------|-------------------|-------------------|---------------|
| 1    | PDA 254 nm        | 14.766               | 9466.65137        | 325.75214         | 49.9494       |
| 2    | PDA 254 nm        | 26.567               | 9485.82324        | 173.16505         | 50.0506       |

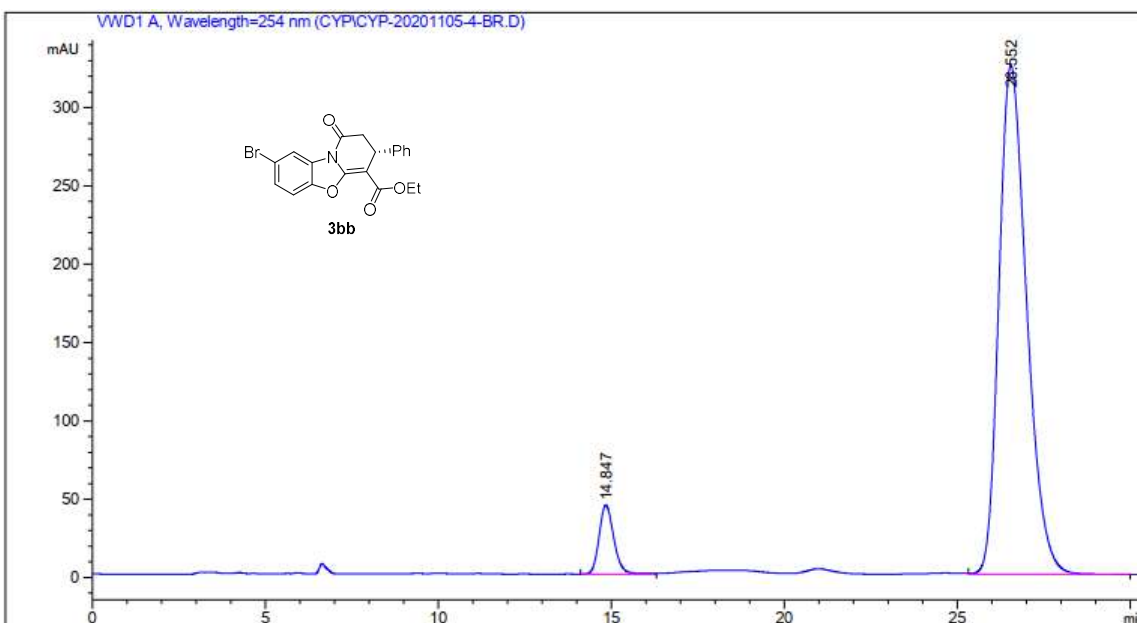

| Peak | Processed channel | Retention time (min) | Peak area (mAU*s) | Peak height (mAU) | Peak area (%) |
|------|-------------------|----------------------|-------------------|-------------------|---------------|
| 1    | PDA 254 nm        | 14.847               | 1307.22607        | 44.11476          | 6.6516        |
| 2    | PDA 254 nm        | 26.552               | 1.80545e4         | 324.88226         | 93.3484       |

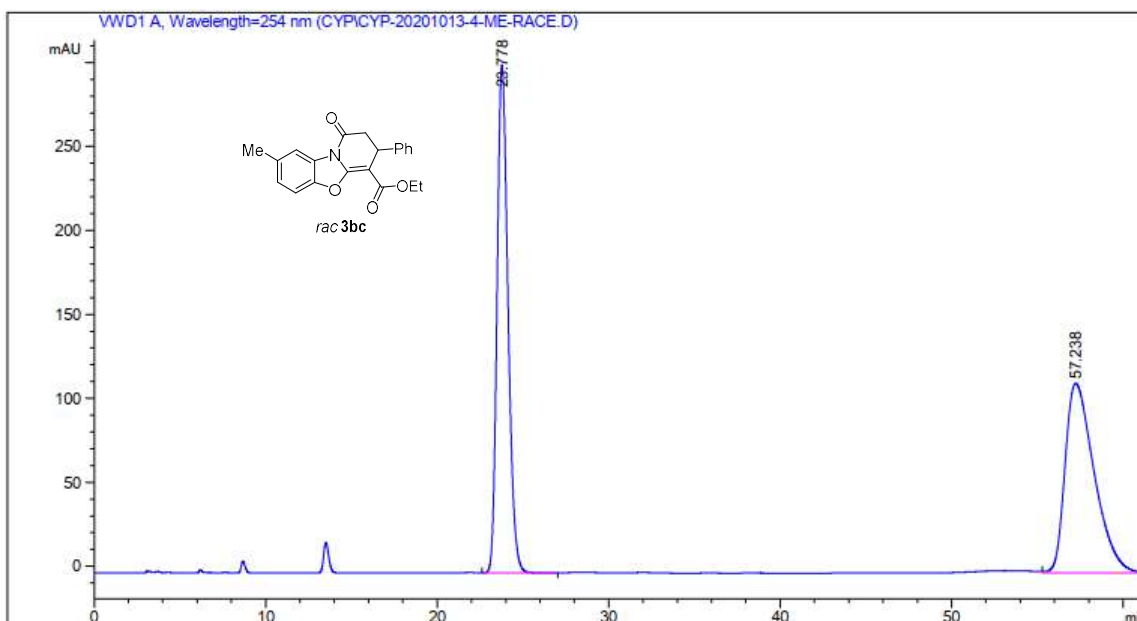

| Peak | Processed channel | Retention time (min) | Peak area (mAU*s) | Peak height (mAU) | Peak area (%) |
|------|-------------------|----------------------|-------------------|-------------------|---------------|
| 1    | PDA 254 nm        | 23.778               | 1.33565e4         | 302.45215         | 50.1058       |
| 2    | PDA 254 nm        | 57.238               | 1.33001e4         | 112.90263         | 49.8942       |

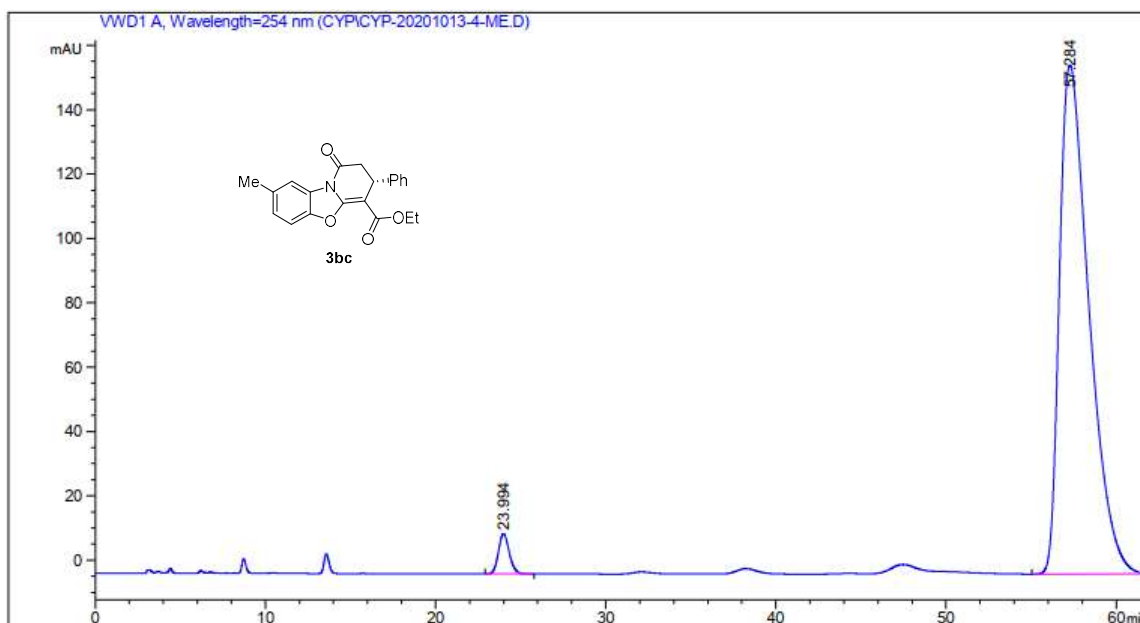

| Peak | Processed channel | Retention time (min) | Peak area (mAU*s) | Peak height (mAU) | Peak area (%) |
|------|-------------------|----------------------|-------------------|-------------------|---------------|
| 1    | PDA 254 nm        | 23.994               | 553.19196         | 12.49642          | 2.8283        |
| 2    | PDA 254 nm        | 57.284               | 1.90057e4         | 158.08862         | 97.1717       |

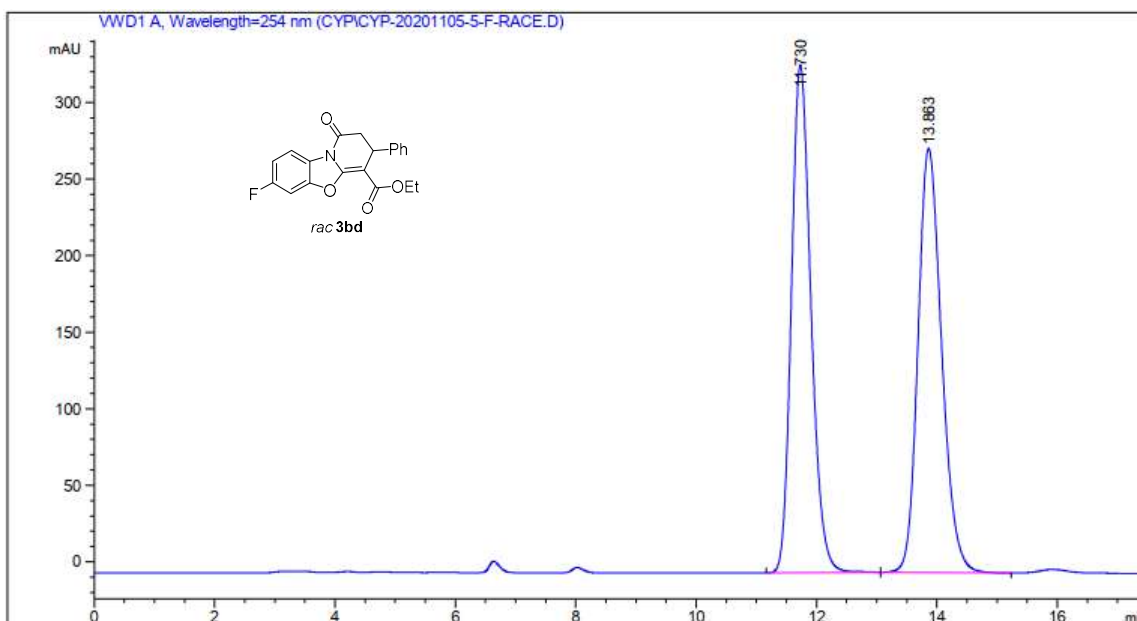

| Peak | Processed channel | Retention time (min) | Peak area (mAU*s) | Peak height (mAU) | Peak area (%) |
|------|-------------------|----------------------|-------------------|-------------------|---------------|
| 1    | PDA 254 nm        | 11.730               | 7458.14258        | 331.33566         | 49.7040       |
| 2    | PDA 254 nm        | 13.863               | 7546.97363        | 276.97400         | 50.2960       |

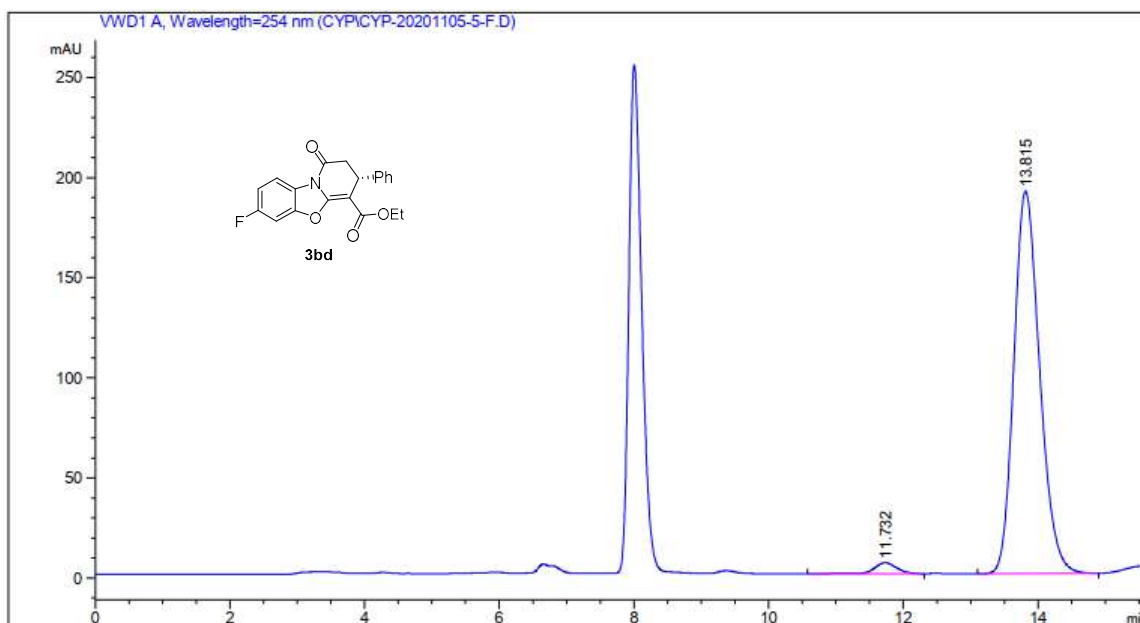

| Peak | Processed channel | Retention time (min) | Peak area (mAU*s) | Peak height (mAU) | Peak area (%) |
|------|-------------------|----------------------|-------------------|-------------------|---------------|
| 1    | PDA 254 nm        | 11.732               | 126.48238         | 5.48188           | 2.4331        |
| 2    | PDA 254 nm        | 13.815               | 5071.83545        | 190.85109         | 97.5669       |

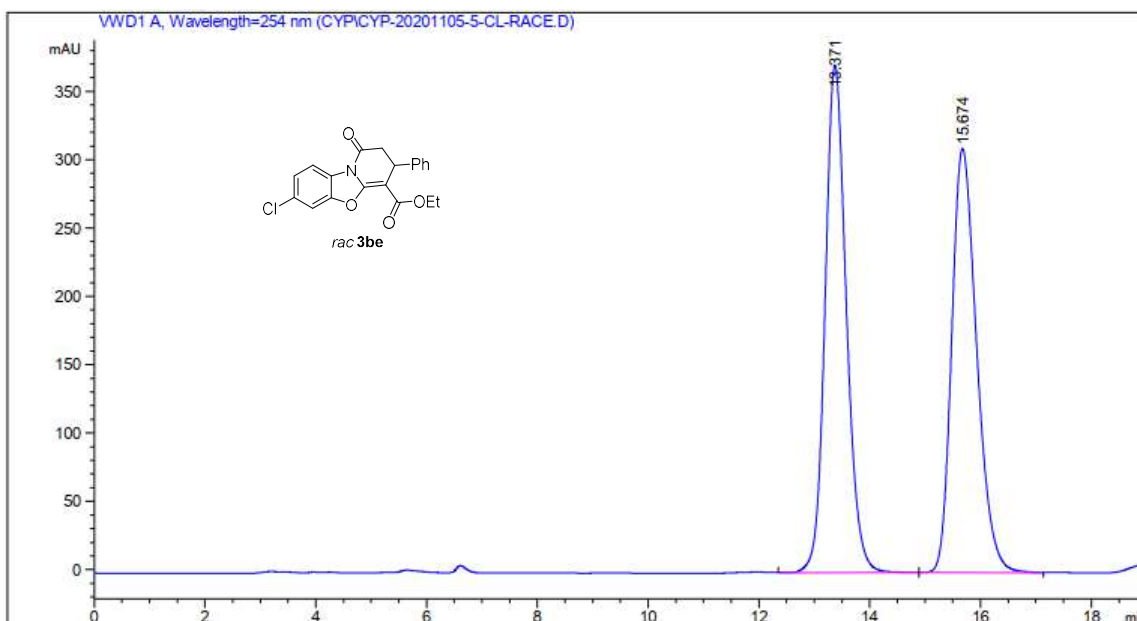

| Peak | Processed channel | Retention time (min) | Peak area (mAU*s) | Peak height (mAU) | Peak area (%) |
|------|-------------------|----------------------|-------------------|-------------------|---------------|
| 1    | PDA 254 nm        | 13.371               | 9874.37305        | 371.41055         | 50.4194       |
| 2    | PDA 254 nm        | 15.674               | 9710.11523        | 310.21320         | 49.5806       |

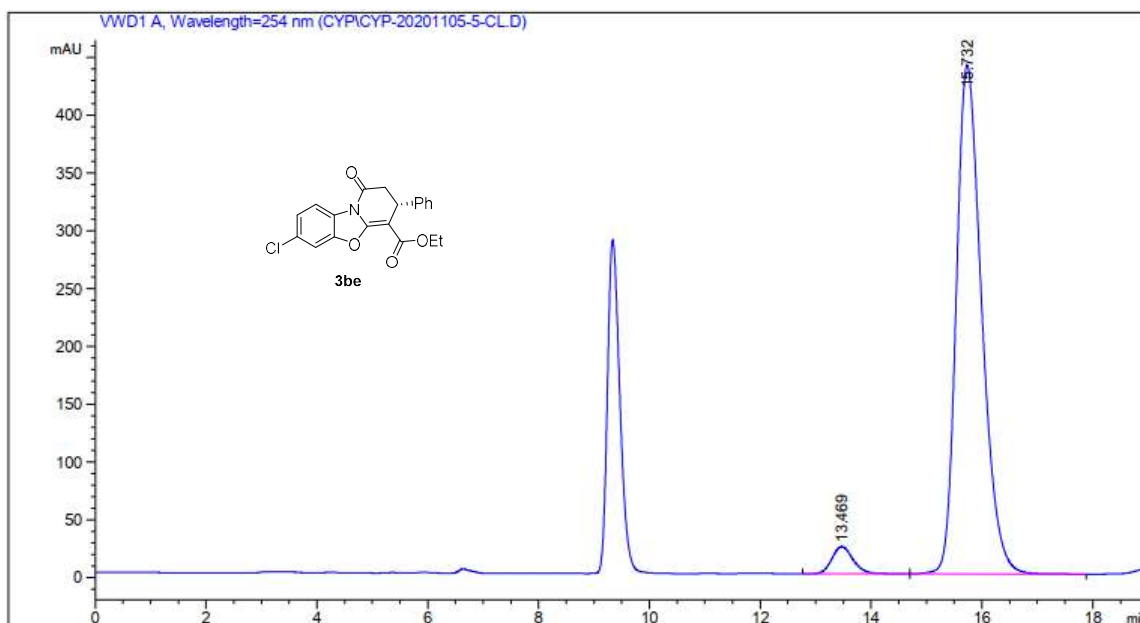

| Peak | Processed channel | Retention time (min) | Peak area (mAU*s) | Peak height (mAU) | Peak area (%) |
|------|-------------------|----------------------|-------------------|-------------------|---------------|
| 1    | PDA 254 nm        | 13.469               | 636.46466         | 23.65788          | 4.3512        |
| 2    | PDA 254 nm        | 15.732               | 1.39910e4         | 439.99384         | 95.6488       |

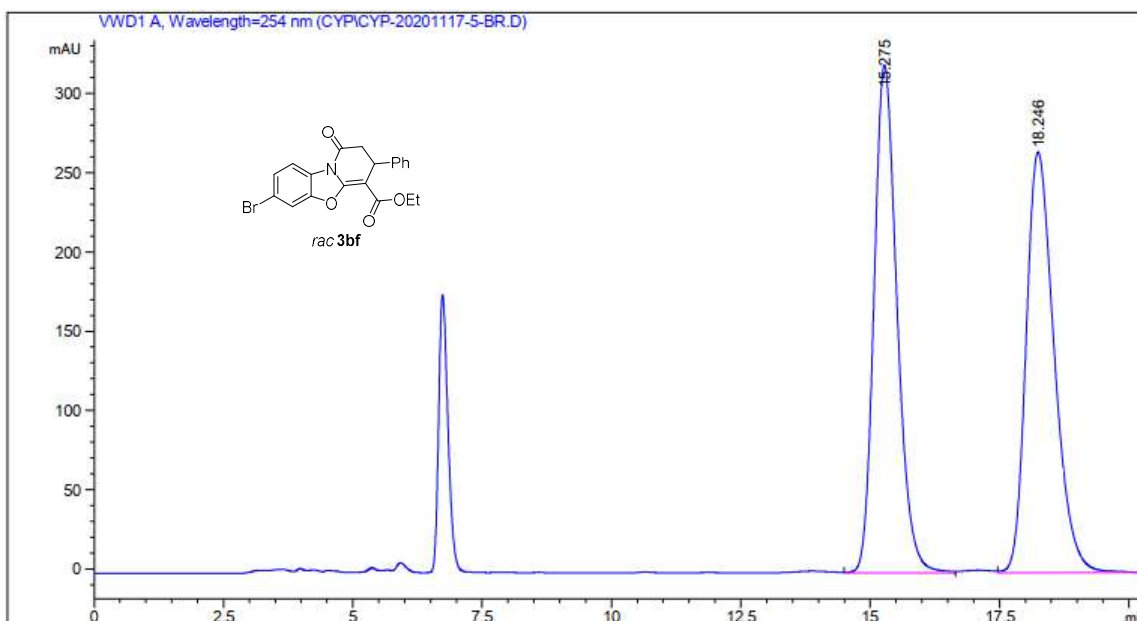

| Peak | Processed channel | Retention time (min) | Peak area (mAU*s) | Peak height (mAU) | Peak area (%) |
|------|-------------------|----------------------|-------------------|-------------------|---------------|
| 1    | PDA 254 nm        | 15.275               | 9892.67090        | 320.06320         | 49.7338       |
| 2    | PDA 254 nm        | 18.246               | 9998.58496        | 265.07974         | 50.2662       |

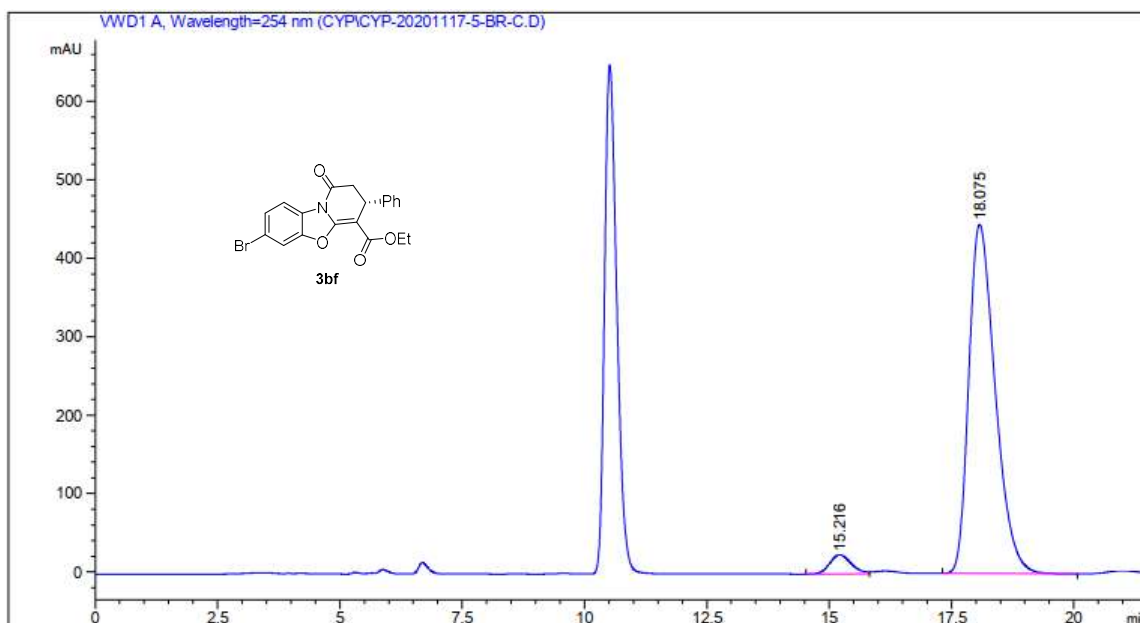

| Peak | Processed channel | Retention time (min) | Peak area (mAU*s) | Peak height (mAU) | Peak area (%) |
|------|-------------------|----------------------|-------------------|-------------------|---------------|
| 1    | PDA 254 nm        | 15.216               | 749.17468         | 24.39825          | 4.2948        |
| 2    | PDA 254 nm        | 18.075               | 1.66947e4         | 445.02573         | 95.7052       |

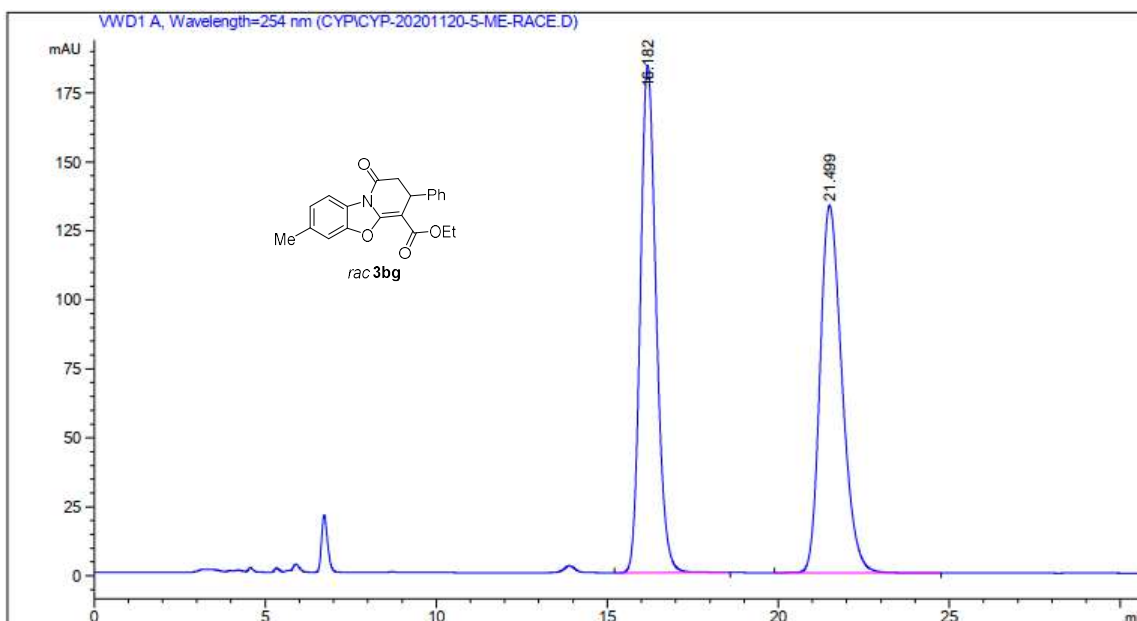

| Peak | Processed channel | Retention time (min) | Peak area (mAU*s) | Peak height (mAU) | Peak area (%) |
|------|-------------------|----------------------|-------------------|-------------------|---------------|
| 1    | PDA 254 nm        | 16.182               | 5906.04443        | 183.97424         | 49.9405       |
| 2    | PDA 254 nm        | 21.499               | 5920.10596        | 133.11406         | 50.0595       |

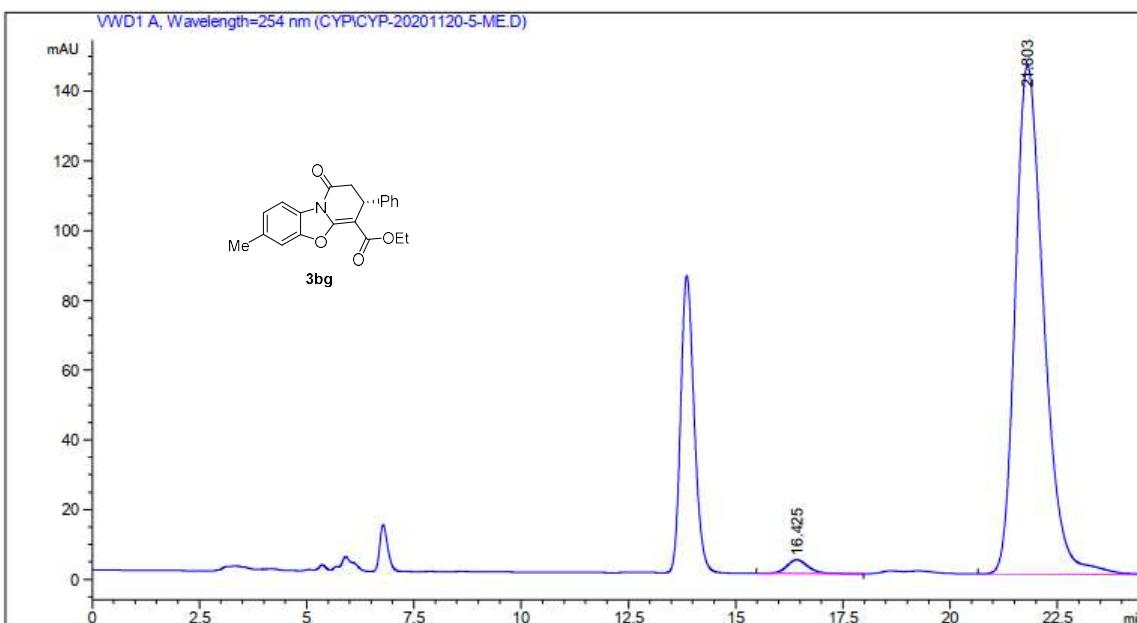

| Peak | Processed channel | Retention time (min) | Peak area (mAU*s) | Peak height (mAU) | Peak area (%) |
|------|-------------------|----------------------|-------------------|-------------------|---------------|
| 1    | PDA 254 nm        | 16.425               | 133.52751         | 3.91110           | 1.9524        |
| 2    | PDA 254 nm        | 21.803               | 6705.60205        | 145.89186         | 98.0476       |

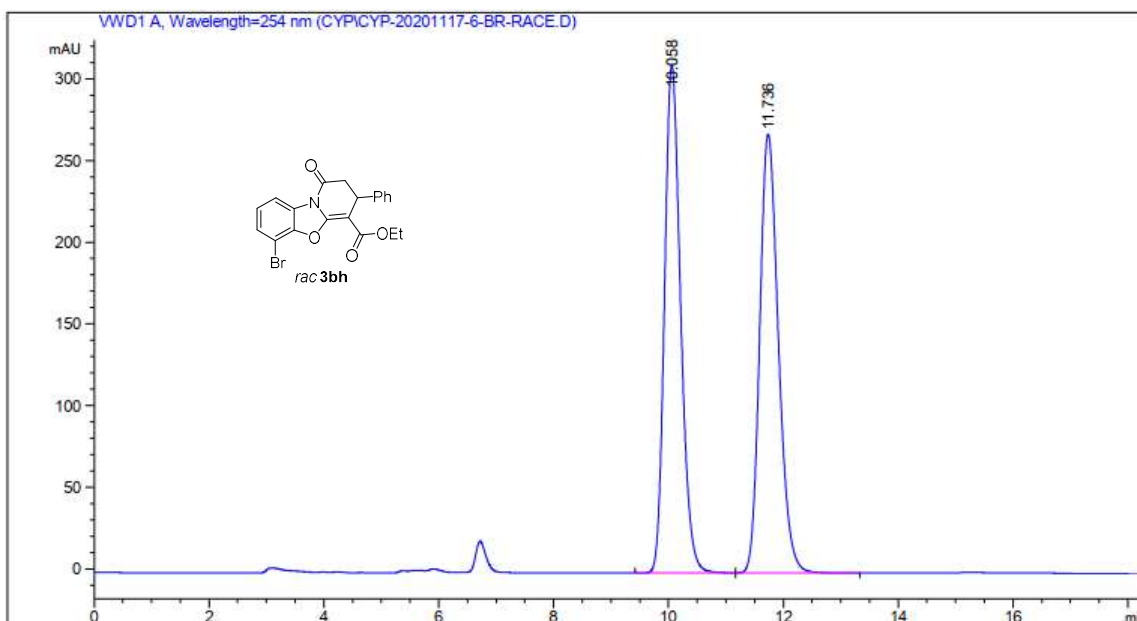

| Peak | Processed channel | Retention time (min) | Peak area (mAU*s) | Peak height (mAU) | Peak area (%) |
|------|-------------------|----------------------|-------------------|-------------------|---------------|
| 1    | PDA 254 nm        | 10.058               | 6033.63281        | 310.73636         | 49.8984       |
| 2    | PDA 254 nm        | 11.736               | 6058.19434        | 268.51181         | 50.1016       |

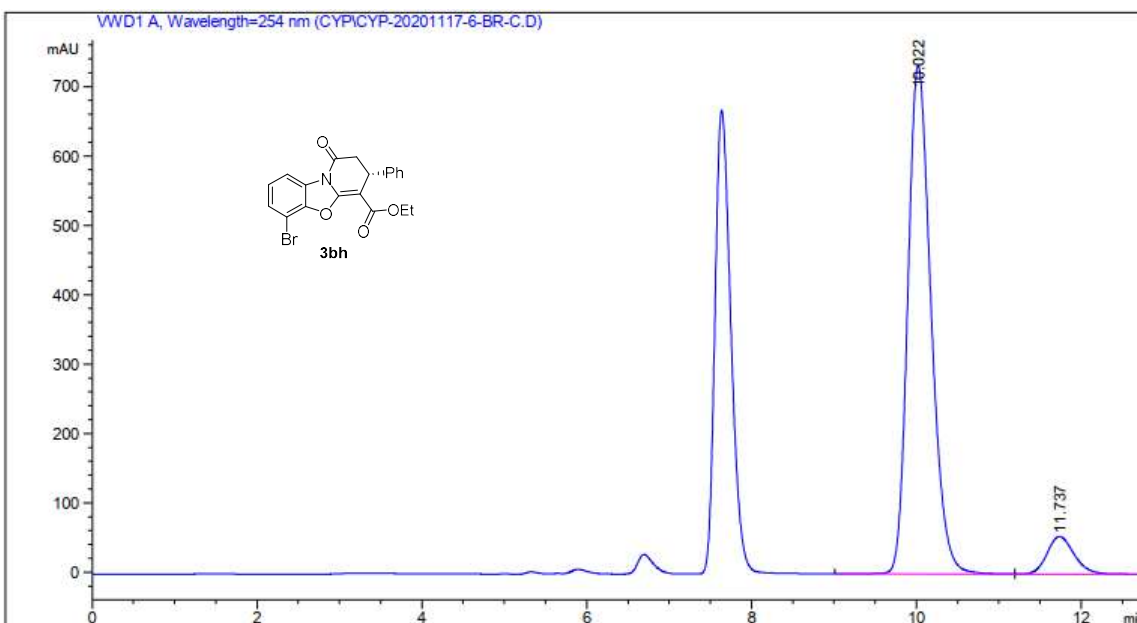

| Peak | Processed channel | Retention time (min) | Peak area (mAU*s) | Peak height (mAU) | Peak area (%) |
|------|-------------------|----------------------|-------------------|-------------------|---------------|
| 1    | PDA 254 nm        | 10.022               | 1.42784e4         | 733.26544         | 92.0630       |
| 2    | PDA 254 nm        | 11.737               | 1230.98035        | 54.13692          | 7.9370        |

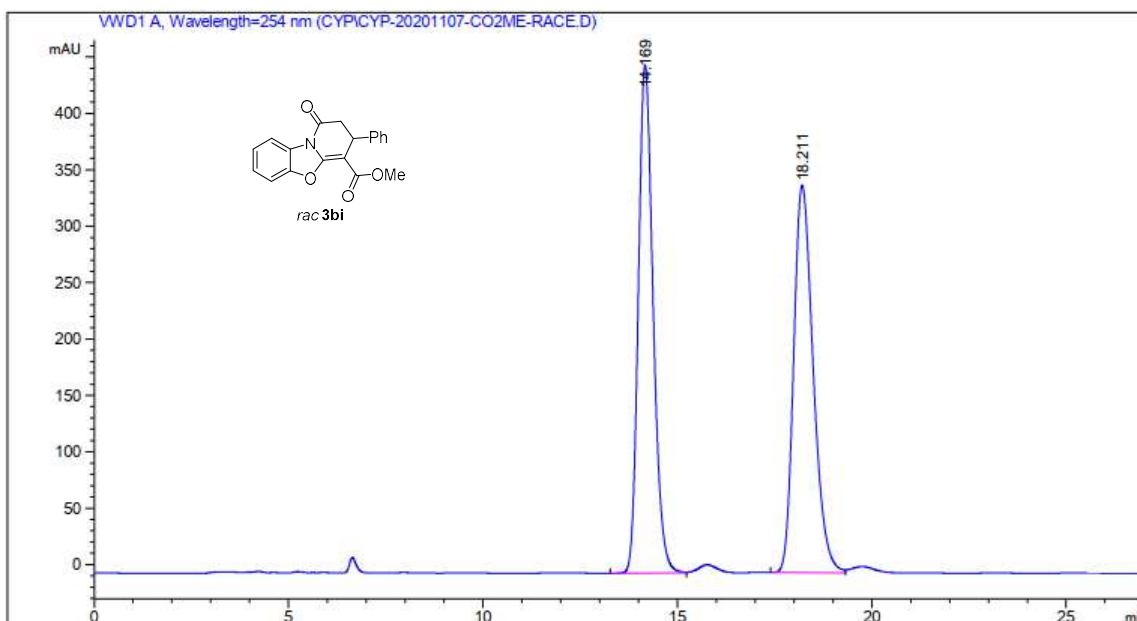

| Peak | Processed channel | Retention time (min) | Peak area (mAU*s) | Peak height (mAU) | Peak area (%) |
|------|-------------------|----------------------|-------------------|-------------------|---------------|
| 1    | PDA 254 nm        | 14.169               | 1.18987e4         | 450.19467         | 49.9061       |
| 2    | PDA 254 nm        | 18.211               | 1.19434e4         | 343.10522         | 50.0939       |

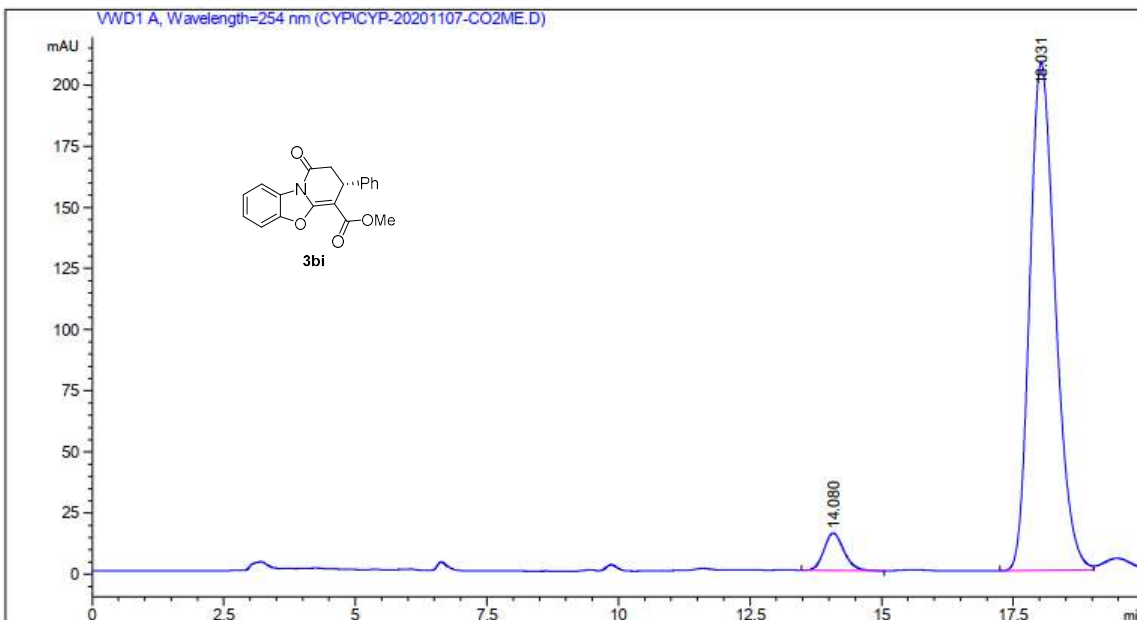

| Peak | Processed channel | Retention time (min) | Peak area (mAU*s) | Peak height (mAU) | Peak area (%) |
|------|-------------------|----------------------|-------------------|-------------------|---------------|
| 1    | PDA 254 nm        | 14.080               | 401.15414         | 15.23404          | 5.3918        |
| 2    | PDA 254 nm        | 18.031               | 7038.92236        | 207.74536         | 94.6082       |



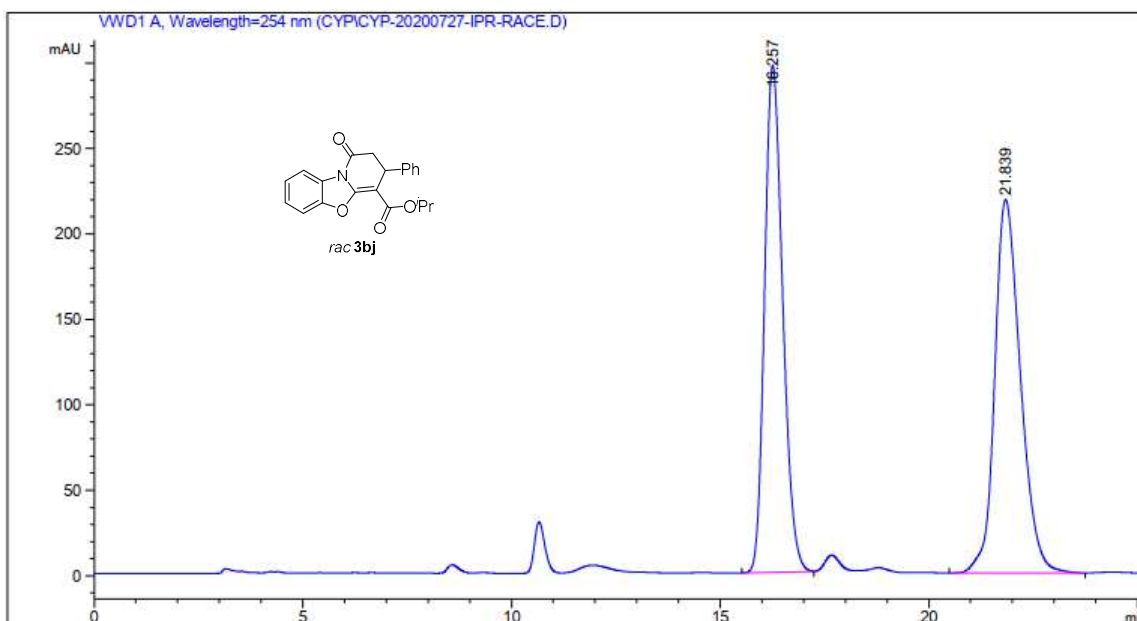

| Peak | Processed channel | Retention time (min) | Peak area (mAU*s) | Peak height (mAU) | Peak area (%) |
|------|-------------------|----------------------|-------------------|-------------------|---------------|
| 1    | PDA 254 nm        | 16.257               | 8925.11328        | 296.61884         | 48.8519       |
| 2    | PDA 254 nm        | 21.839               | 9344.63379        | 218.23744         | 51.1481       |

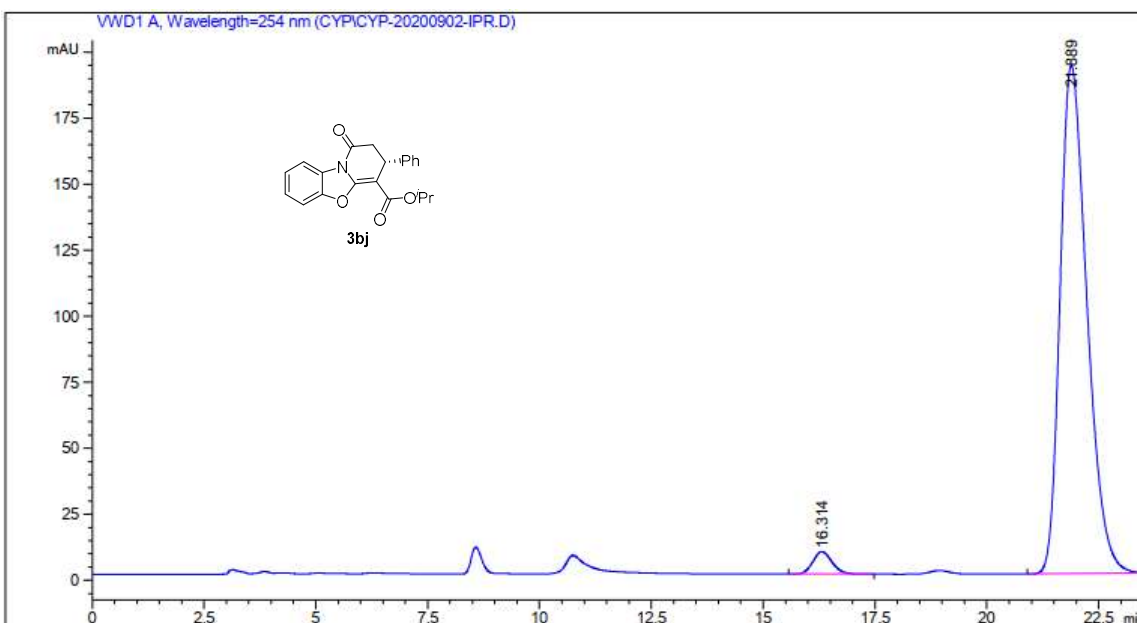

| Peak | Processed channel | Retention time (min) | Peak area (mAU*s) | Peak height (mAU) | Peak area (%) |
|------|-------------------|----------------------|-------------------|-------------------|---------------|
| 1    | PDA 254 nm        | 16.314               | 253.03398         | 8.46238           | 3.0605        |
| 2    | PDA 254 nm        | 21.889               | 8014.64209        | 192.45447         | 96.9395       |

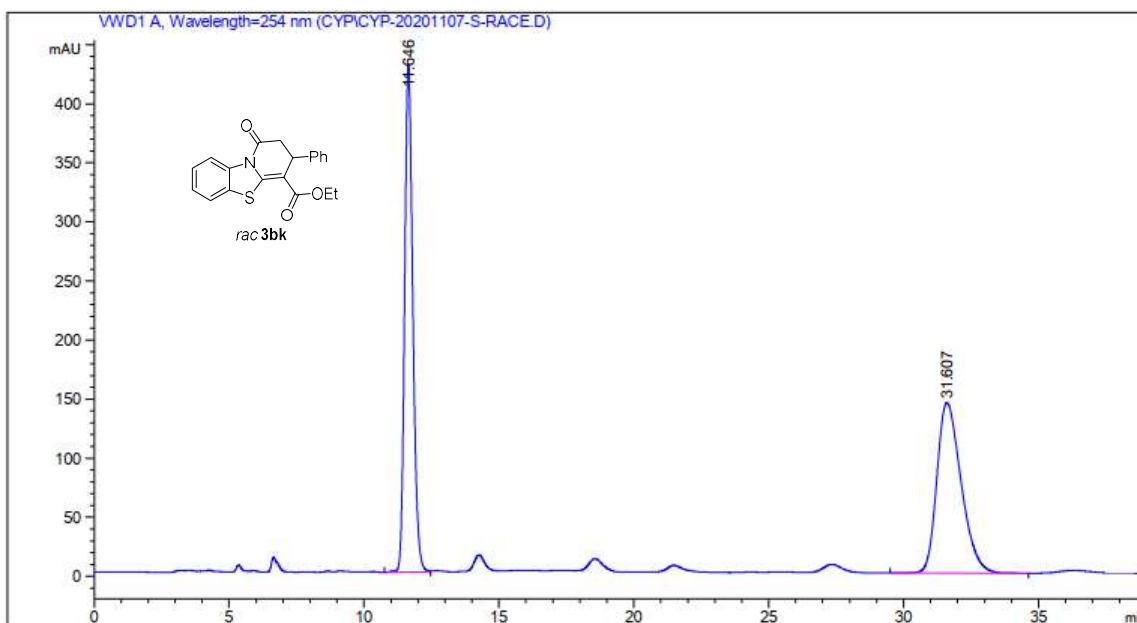

| Peak | Processed channel | Retention time (min) | Peak area (mAU*s) | Peak height (mAU) | Peak area (%) |
|------|-------------------|----------------------|-------------------|-------------------|---------------|
| 1    | PDA 254 nm        | 11.646               | 9061.02539        | 428.93066         | 50.1588       |
| 2    | PDA 254 nm        | 31.607               | 9003.65332        | 144.14220         | 49.8412       |

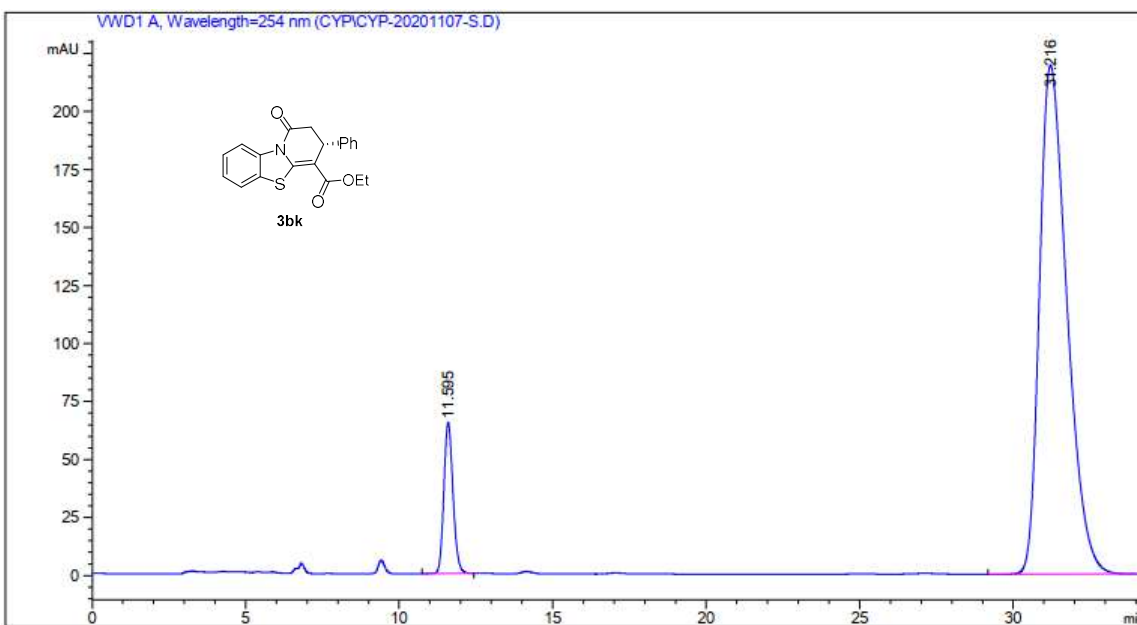

| Peak | Processed channel | Retention time (min) | Peak area (mAU*s) | Peak height (mAU) | Peak area (%) |
|------|-------------------|----------------------|-------------------|-------------------|---------------|
| 1    | PDA 254 nm        | 11.595               | 1347.18005        | 65.04278          | 9.0054        |
| 2    | PDA 254 nm        | 31.216               | 1.36125e4         | 219.29218         | 90.9946       |

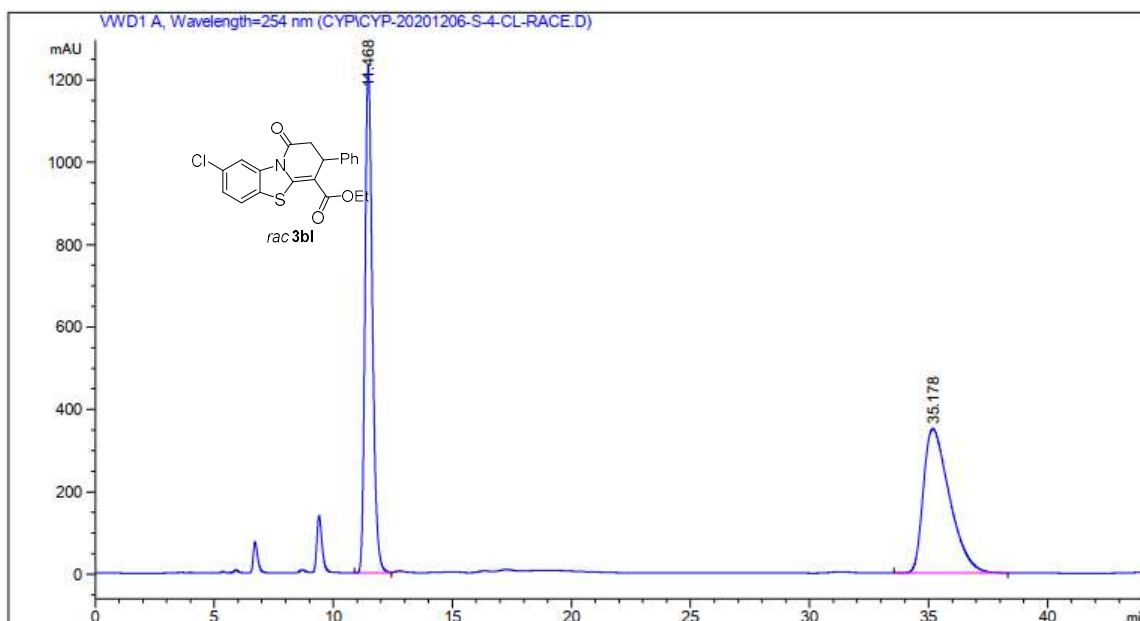

| Peak | Processed channel | Retention time (min) | Peak area (mAU*s) | Peak height (mAU) | Peak area (%) |
|------|-------------------|----------------------|-------------------|-------------------|---------------|
| 1    | PDA 254 nm        | 11.468               | 2.65491e4         | 1232.15308        | 49.8357       |
| 2    | PDA 254 nm        | 35.178               | 2.67242e4         | 350.00629         | 50.1643       |

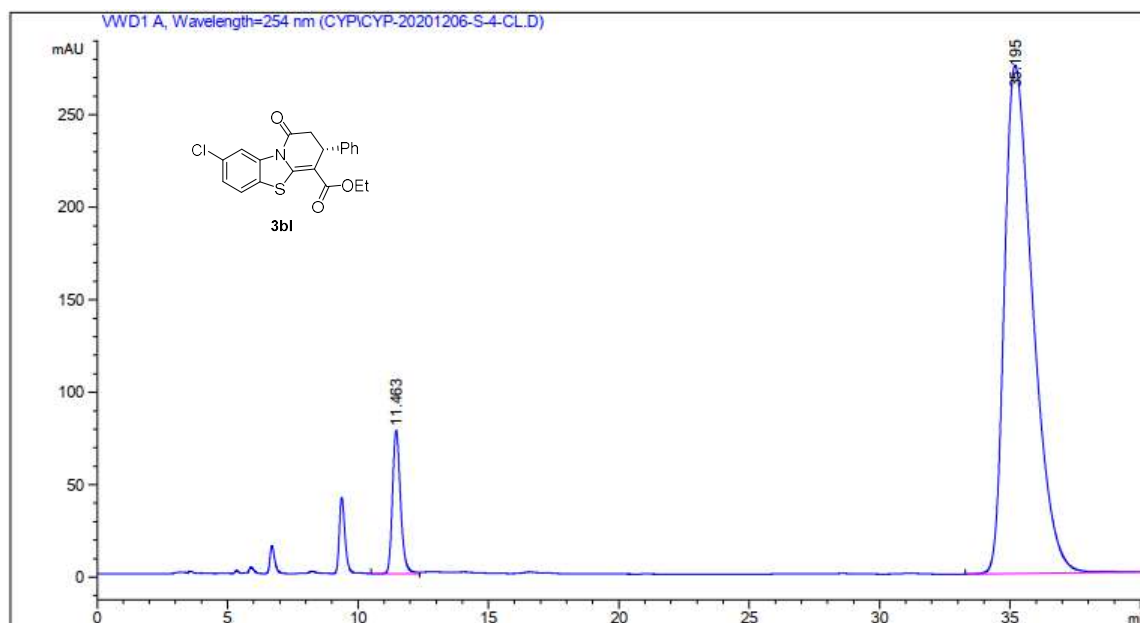

| Peak | Processed channel | Retention time (min) | Peak area (mAU*s) | Peak height (mAU) | Peak area (%) |
|------|-------------------|----------------------|-------------------|-------------------|---------------|
| 1    | PDA 254 nm        | 11.463               | 1663.94128        | 77.39524          | 7.4279        |
| 2    | PDA 254 nm        | 35.195               | 2.07372e4         | 274.77917         | 92.5721       |

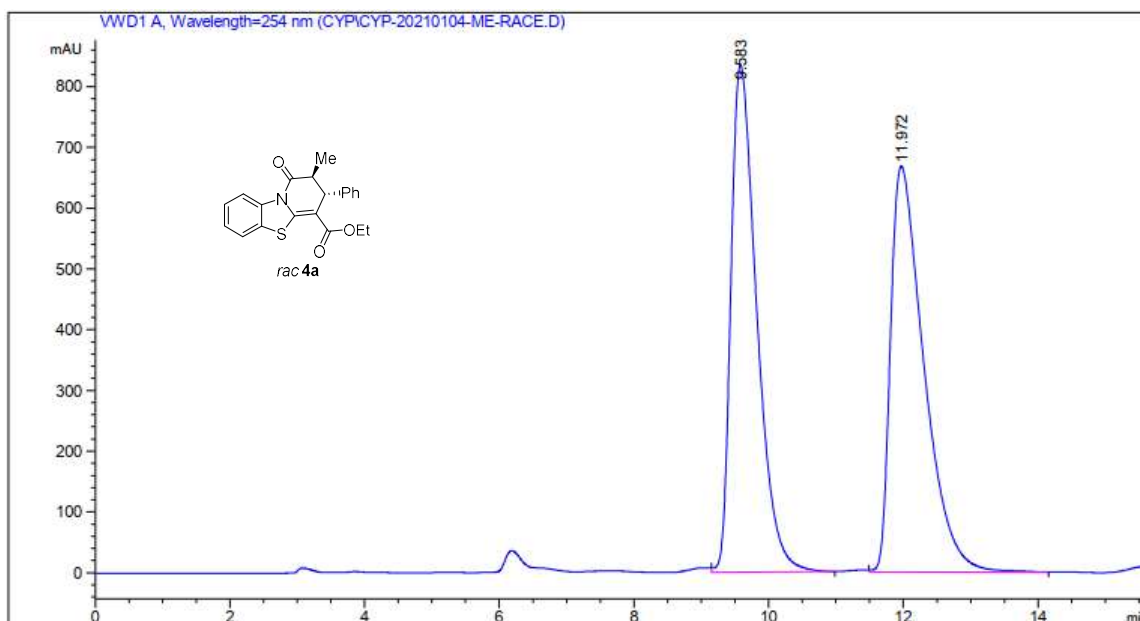

| Peak | Processed channel | Retention time (min) | Peak area (mAU*s) | Peak height (mAU) | Peak area (%) |
|------|-------------------|----------------------|-------------------|-------------------|---------------|
| 1    | PDA 254 nm        | 9.583                | 2.21963e4         | 834.30603         | 49.1560       |
| 2    | PDA 254 nm        | 11.972               | 2.29585e4         | 667.63513         | 50.8440       |

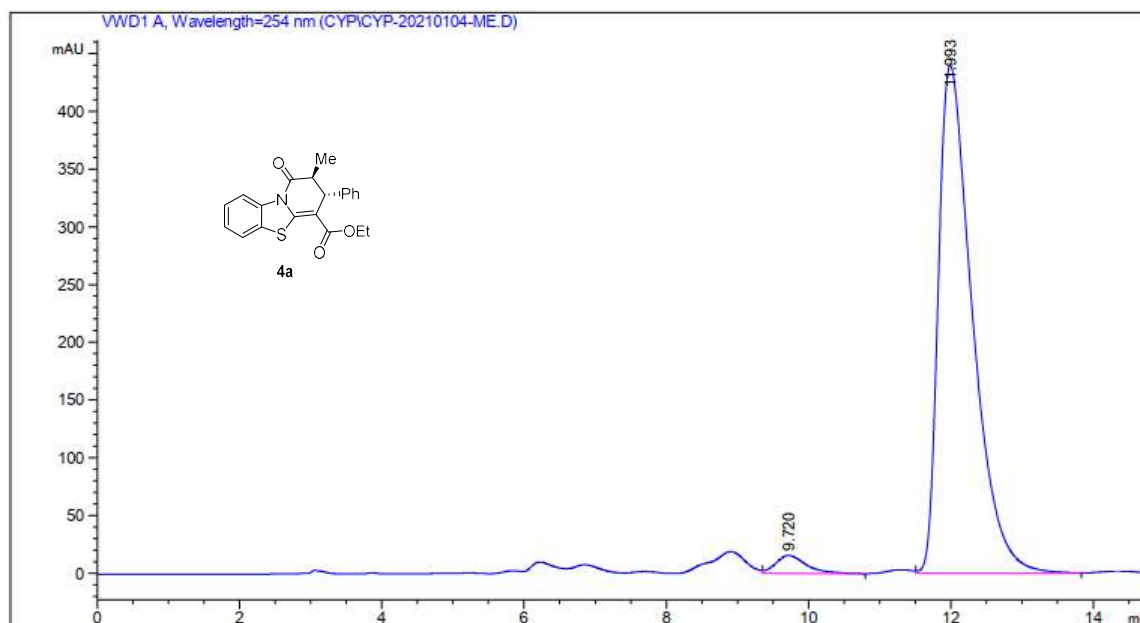

| Peak | Processed channel | Retention time (min) | Peak area (mAU*s) | Peak height (mAU) | Peak area (%) |
|------|-------------------|----------------------|-------------------|-------------------|---------------|
| 1    | PDA 254 nm        | 9.720                | 469.93253         | 15.74345          | 3.1142        |
| 2    | PDA 254 nm        | 11.993               | 1.46198e4         | 440.11160         | 96.8858       |
